# 1 Cortical responses to vagus nerve 2 stimulation are modulated by ongoing 3 oscillatory activity associated with 4 different brain states in non-human 5 primates 6

7 Running title: Vagal evoked potentials are modulated by brain state

8

9 Irene Rembado<sup>1</sup>, David K. Su<sup>2</sup>, Ariel Levari<sup>1</sup>, Larry E. Shupe<sup>1</sup>, Steve Perlmutter<sup>1</sup>, Eberhard Fetz<sup>1</sup>, Stavros  
10 Zanos<sup>3</sup>

11

12 <sup>1</sup>Department of Physiology & Biophysics, University of Washington, 1705 NE Pacific St, Seattle, WA  
13 98195, USA

14 <sup>2</sup>Department of Neurological Surgery, University of Washington, 1959 NE Pacific St, Seattle, WA  
15 98195, USA

16 <sup>3</sup>Institute of Bioelectronic Medicine, Feinstein Institutes for Medical Research, 350 Community Drive,  
17 Manhasset NY 11030, USA

18

19 Corresponding authors: Irene Rembado: [irene.rembado@gmail.com](mailto:irene.rembado@gmail.com), Stavros Zanos:  
20 [szanos@northwell.edu](mailto:szanos@northwell.edu)

## 21 Abstract

22 Vagus nerve stimulation (VNS) is tested as therapy for several brain disorders and as a means to modulate  
23 brain plasticity. Cortical effects of VNS, manifesting as vagal-evoked potentials (VEPs), are thought to  
24 arise from activation of ascending cholinergic and noradrenergic systems. However, it is unknown  
25 whether those effects are dependent on oscillatory brain activity underlying different brain states. In 2  
26 freely behaving macaque monkeys, we delivered trains of left cervical VNS, at different pulsing  
27 frequencies (5-300 Hz), while recording local field potentials (LFP) from sites in contralateral prefrontal,  
28 sensorimotor and parietal cortical areas, continuously over 11-16 hours. Different brain states were

29 inferred from oscillatory components of LFPs and the presence of overt movement: active awake, resting  
30 awake, REM sleep and NREM sleep. VNS elicited VEPs comprising early (<70 ms), intermediate (70-  
31 250 ms) and late (>250 ms) components in all sampled cortical areas. The magnitude of only the  
32 intermediate and late components was modulated by brain state and pulsing frequency. These findings  
33 have implications for the role of ongoing brain activity in shaping cortical responses to peripheral stimuli,  
34 for the modulation of vagal interoceptive signaling by cortical states, and for the calibration of VNS  
35 therapies.

### 36 **Key Words**

37 brain states, non-human primates, VNS

38

### 39 **Introduction**

40 Vagus nerve stimulation (VNS) is a non-pharmacological, FDA-approved treatment for epilepsy and  
41 depression and has been tested as a possible therapy for headache, sleep disorders and neurorehabilitation  
42 after stroke (Elger et al., 2000; George et al., 2002; Henry, 2002; Dawson et al., 2016). VNS has  
43 beneficial effects on cognition and behavior, as it enhances cognitive abilities in Alzheimer's patients  
44 (Sjogren et al., 2002), and facilitates decision-making in animals (Cao et al., 2016). The afferent vagus  
45 projects directly or indirectly to several brainstem and forebrain nuclei including the nucleus of solitary  
46 tract, the locus coeruleus and the nucleus basalis (Henry, 2002; Hassert et al., 2004; Cheyuo et al., 2011)  
47 and from there to numerous subcortical and cortical areas (Pritchard et al., 2000; Henry, 2002), releasing  
48 mostly norepinephrine and acetylcholine. VNS suppresses cortical excitability (Zagon and Kemeny,  
49 2000; Di Lazzaro et al., 2004; Nichols et al., 2011) and enhances plasticity by facilitating reorganization  
50 of cortical maps (Porter et al., 2012; Shetake et al., 2012; Engineer et al., 2015). Moreover, due to the  
51 precise control of the timing of its delivery, VNS is a candidate for delivering temporary precise, closed-  
52 loop neuromodulation to the brain (Zanos, 2019), to treat neurological disorders and augment learning  
53 (Engineer et al., 2011; Hays et al., 2016; Pruitt et al., 2016).

54 Afferent volleys elicited by VNS give rise to vagal evoked potentials (VEPs) at different levels, including  
55 brainstem, hippocampus, thalamus and cerebral cortex (Car et al., 1975; Hammond et al., 1992a, b; Ito  
56 and Craig, 2005). Cortical VEPs in humans are widespread and bilateral and comprise a component  
57 within the first 10-20 ms post-stimulus (Hammond et al., 1992a) and additional components with longer  
58 latencies (Upton et al., 1991). There are well-documented differences, with regards to features of VEPs,  
59 between healthy subjects of different ages (Fallgatter et al., 2005), between healthy subjects and patients  
60 (Polak et al., 2007), and within populations of patients with cognitive impairment (Metzger et al., 2012).  
61 Cortical responses to VNS may be used to screen subjects for neurodegenerative diseases, to assist the  
62 diagnosis and to track disease progression. Furthermore, EEG markers, like VEPs, could be used to  
63 predict effectiveness of VNS therapy (Ravan et al., 2017).

64 Such uses for VEPs are confounded by factors like stimulus intensity, pulse width and pulsing frequency  
65 (Polak et al., 2009; Hagen et al., 2014). In addition, since VEPs are elicited by subcortical projections to  
66 the cortex and generated by stimulus-evoked cortical activity, ongoing brain activity, both cortical and  
67 subcortical, at the time of stimulation, may affect VEPs. Brain-wide oscillatory cortical activity changes  
68 between behavioral states, in both natural conditions (e.g. wakefulness and sleep cycles) and in  
69 pathological conditions (Steriade et al., 1993a; Steriade, 1997; Destexhe et al., 1999; Vesuna et al., 2020).  
70 Profound changes in cortical responsiveness to sensory stimuli have been documented in association with  
71 different patterns of ongoing cortical activity (Livingstone and Hubel, 1981; Massimini et al., 2005;  
72 Hennevin et al., 2007), including awake and sleep states. Likewise, cortical potentials evoked by  
73 electrical stimulation of somatic peripheral nerves have been shown to be modulated by brain states  
74 (Shaw et al., 2006). However, it is unknown whether VEPs are also modulated by brain states. Given the  
75 widespread afferent vagal projections to many subcortical and cortical sites, such modulation could offer  
76 insights into the central processing and integration of “interoceptive” signals conveyed to the brain by the  
77 vagus (Paciorek and Skora, 2020). In turn, it could have implications for how vagal interoceptive signals  
78 are modulated by ongoing brain activity in processes like emotion (Critchley and Garfinkel, 2017),

79 cognition (Tsakiris and Critchley, 2016), decision making (Seth, 2013) and action (Marshall et al., 2018),  
80 and in mental diseases in which interoception has been implicated (Khalsa et al., 2018).

81 To investigate whether and how VEPs are modulated by ongoing cortical activity associated with  
82 different brain states, we used an autonomous portable computer, the Neurochip (Zanos et al., 2011), to  
83 deliver thousands of short VNS trains in 2 freely behaving monkeys, over 11-16 hours, while recording  
84 intracortical LFPs across sites in prefrontal, sensorimotor and parietal areas. We identified epochs in  
85 which LFP activity in wide-spread cortical areas was dominated by high frequency oscillations (8-55 Hz),  
86 with and without overt movement, indicative of wakefulness, by theta oscillations (4-8 Hz), indicative of  
87 rapid-eye-movement (REM) sleep and by delta oscillations (1-4 Hz), indicative of non-REM (NREM)  
88 sleep. We compiled VEPs in each cortical site, separately for each of those states. We also documented  
89 the effects of pulsing frequency (5-300 Hz) on cortical responses. We found that VNS elicited VEPs in  
90 all sampled cortical areas. Most VEPs comprised 3 main components, with short (<70 ms), intermediate  
91 (70-250 ms) and long latencies (>250 ms). The magnitude of the early component was not affected by  
92 ongoing cortical activity, while that of intermediate and late components was significantly larger during  
93 epochs of slow frequency oscillations. At the same time, pulsing frequency of VNS significantly affected  
94 the amplitude of VEPs. These effects were sizable, as VEPs elicited from 300-Hz VNS during epochs of  
95 slow frequency dominance had intermediate and late components that were 300-500% larger than those  
96 during awake conditions.

## 97 **Methods**

### 98 **Subjects**

99 Experiments were performed with two male macaque nemestrina monkeys aged 5 and 6 years old and  
100 weighing 10.4 and 10.9 kg, respectively. The experiments were approved by the Institutional Animal Care  
101 and Use Committee (IACUC) at the University of Washington and all procedures conformed to the  
102 National Institutes of Health Guide for the Care and Use of Laboratory Animals.



### 103 Cortical implant

104 During sterile surgery, each monkey was anesthetized with sevoflurane gas. A midline scalp incision was  
105 made and the scalp was resected. The intracortical electrodes were implanted through individual 0.5mm  
106 burr holes drilled with a stereotaxic guide. A total of 32 electrodes were placed in two hemispheres. On  
107 each hemisphere, the electrodes were located over the prefrontal, sensorimotor and parietal cortical areas.  
108 M1 received also two penetrating electrodes targeting the thalamus (one for each hemisphere).

109 The intracortical electrodes were made in house with 3mm cut length of platinum rod (AM Systems  
110 #711000, 0.254 mm diameter) insulated with heat-shrink Pebax (Small Parts #B0013HMWJQ). Pebax  
111 was cut so that the diameter of the exposed tip was ~0.5 mm, corresponding to an exposed surface area of  
112 ~0.06 mm<sup>2</sup>. Impedances ranged between 10 and 50 KOhms (at 1000 Hz). Skull screws used as ground  
113 and reference leads were placed on the occipital or the temporal bone, depending on skull exposure  
114 during surgery and the availability of space after the electrode implantation. The implant and the  
115 connectors were secured to the skull with acrylic cement and enclosed in titanium casing that was also  
116 attached to the skull with cement and skull screws.

### 117 Vagus nerve implant

118 In a separate procedure the monkeys received the stimulating cuff on the left cervical VN. Under general  
119 anesthesia with sevoflurane gas each animal was positioned supine. A horizontal cervical incision was  
120 made above the left clavicle, medial to the sternocleidomastoid muscle. The skin was retracted to obtain a  
121 vertical exposure of the carotid sheath. The sheath was then opened, and the VN was exposed for a length  
122 of ~3-4 cm between the jugular vein and the carotid artery. A rubber loop was passed behind the nerve to  
123 help with the manipulation and the VN electrode was placed around the VN trunk. We then secured the  
124 proximal end of the electrode leads with sutures at the subcutaneous tissue close to the implant to provide  
125 support for the placement of the nerve cuff on the nerve trunk. The distal end of the leads was routed  
126 subcutaneously all the way up to a skin opening at the back of the head, very close to the edge of the head  
127 chamber that has been installed previously during the cortical procedure (see skull surgery and cortical  
128 implant). The leads immediately entered the chamber and they were secured to the base using acrylic. A

129 two-channel connector was used to electrically connect the cuff leads with a stimulator. The head and the  
130 neck incisions were then sutured. The monkey was treated with post-surgery analgesics and antibiotics for  
131 a 10-day recovery period.

132 A bipolar nerve cuff (Cyberonics, LivaNova Inc.) comprised two platinum-iridium filament bands each of  
133 them embodied in a flexible, silicone-base, helical loop. A third helical loop was included to stabilize the  
134 array around the nerve. The total length of the cuff (3 helical loops) measured 3cm with an internal  
135 diameter of 2mm.

### 136 Overnight recording and stimulation

137 We used an updated version of Neurochip2 (Zanos et al., 2011), the Neurochip3, to record cortical  
138 activity and motor movements while simultaneously stimulating the vagus nerve, for a total period of 10-  
139 13 hours. Signals from 16 cortical sites (maximum number of Neurochip3 recording channels) from the  
140 right hemisphere, contralateral to the implanted nerve cuff, were recorded single-ended, with a skull  
141 screw as tissue ground, at 16-bit resolution, sampled at 5 KHz, and a low-frequency cutoff of 0.01Hz. The  
142 choice of recording neural signals only from contralateral sites was dictated by our earlier observation  
143 that VEPs in the contralateral hemisphere were overall larger than those in the ipsilateral hemisphere  
144 (Zanos, 2016). Gross motor movements (head and whole-body movements) were quantified by a 3-axis  
145 accelerometer powered by a 3 V lithium coin cell fixed in the titanium casing. The three analog outputs of  
146 the accelerometer were passed through a sum-of-absolute circuit and the magnitude of its signal output  
147 was sampled at 5 KHz.

148 Neurochip3 also delivered trains of stimulus pulses in current mode through a bipolar stimulation channel  
149 connected to the nerve cuff leads (see next paragraph for details). Stimulus timestamps were stored in the  
150 same time-base as the neural recordings.

151 Each recording began with the animal seated in a primate chair in the lab. Neurochip3 was then  
152 programmed by entering the desired settings into a Matlab GUI and uploading them via IR connection.  
153 The animal was then returned to its cage where it moved freely until the following day. Recorded data

154 were stored on a removable flash memory card with 32-GB capacity and later imported to Matlab. For  
155 each session we took notes of the time of day when the Neurochip started to record.

### 156 **Vagus nerve stimulation**

157 The Neurochip was programmed to deliver trains of 200  $\mu$ s biphasic, symmetric, current pulses at 1250  
158  $\mu$ A. Each train consisted of 5 pulses with 10-sec interval between consecutive trains. Neurochip3 cycled  
159 through 4 different pulsing frequencies during each session. The tested frequencies were arranged in two  
160 sets. The first set was defined as [5Hz, 30Hz, 100Hz, 300Hz], while the second set contained [50Hz,  
161 80Hz, 150Hz, 200Hz] as frequency values. The two frequency sets together resulted in a total of 8  
162 stimulation protocols, tested in multiple sessions of 4 stimulation protocols per each session. In each  
163 session the same stimulation protocol was delivered for 20 or 10 minutes, in M1 and M2, respectively,  
164 before switching to the next protocol. The 4 stimulation protocols kept cycling until the batteries  
165 completely discharged (approximately 12 hours). We completed 4 sessions with M2, with the 8  
166 stimulation protocols tested twice, and 2 sessions with M1 resulting in a total number of 7 stimulation  
167 protocols tested once (the 30Hz stimulation was not delivered, data without stimulation was retained  
168 instead).

### 169 **Brain state classification**

170 Data analysis was performed offline in Matlab (MathWorks, Inc.) through customized scripts. The  
171 identification of brain states was performed by evaluating the contribution of different frequency bands on  
172 the power spectrum of the ECoG signal for each cortical site and by estimating the amount of movement  
173 assessed through the acceleration signal.

174 Brain state classification was performed on 6-sec artifact-free epochs, and four different states were  
175 identified (Figure 1A, 2): active-wake (AW); resting-wake (RW); non-rapid eye movement sleep  
176 (NREM); and rapid eye movement sleep (REM). Because of the absence of electromyographic (EMG)  
177 activity and electroculogram (EOG) activity we could not validate our brain state classification by the  
178 standard criteria defined by Rechtschaffen and Kales (Rechtschaffen, 1968). However, several studies in

179 different species characterized the different vigilance and sleep states in term of power spectrum of  
180 cortical signal (Armitage, 1995; Rachalski et al., 2014; Panagiotou et al., 2017). Therefore, our  
181 classification technique is based on the assumption that different brain states can be inferred from the  
182 EEG relative power in five frequency bands plus the accelerometer signal, which can be considered a  
183 gross indication of EMG activity. This assumption is supported by studies which have shown that the  
184 most relevant feature for sleep/wake states classification is the set expressing the EEG relative power in  
185 different frequency bands, which alone is able to reach a classification accuracy above 70% (Zoubek L.,  
186 2007; Charbonnier et al., 2011; Krakovska and Mezeiova, 2011). The accuracy increases even more when  
187 the EMG activity is taken into account (Zoubek L., 2007).

188 In this study, AW state was attributed to epochs with acceleration above zero for a sustained period of  
189 time (>60% of the duration of the epoch). RW epochs were characterized by neural signal with a  
190 predominant contribution of alpha (8 – 14 Hz), beta (14 – 35 Hz), and gamma (35 – 55 Hz) activity.  
191 Epochs showing high delta activity (1 – 4 Hz) in the EEG were scored as NREM, while the REM state  
192 was associated to a predominant theta activity (4 – 8 Hz). All these three latter states were accompanied  
193 with acceleration kept below the threshold used to assess the AW state. Our classification criteria also  
194 took into account the time of day, by assigning the two sleep stages (NREM and REM) only to epochs  
195 between 6 pm and 7 am, times when the room light went off and on respectively. This last criterion was  
196 included only to refine the classification algorithm and did not compromise the final outcome. This is  
197 demonstrated by the comparison based on the number of classified epochs for each recording site and  
198 each brain state between the classifier which included the time of day as a classification criterion and the  
199 classifier which did not include it as a criterion. Both classifiers returned a similar number of epochs  
200 (Figure S1, <https://doi.org/10.6084/m9.figshare.12724739.v2>).

## 201 Power analysis

202 Neural recordings from each cortical site were segmented into 6 second-long epochs, taken before the  
203 onset of each stimulus train. For each epoch we calculated the power density spectrum using the

204 multitaper method (Babadi and Brown, 2014). From the power spectrum we estimated the absolute power  
205 in the following frequency bands: delta 1 – 4 Hz, theta 4 – 8 Hz, alpha 8 – 14 Hz, beta 14 – 35 Hz,  
206 gamma 35 – 55 Hz, as the integral of the absolute power density ( $\mu\text{V}^2/\text{Hz}$ ) within its frequency range  
207 (Figure 1A, 1B). We then derived the relative power in each band by dividing the absolute power in each  
208 frequency band by the absolute power summed over all 5 frequency bands. For each channel, we obtained  
209 5 distributions of relative power values, with the same number of samples (i.e. the total number of epochs  
210 during the duration of each free behavior experiment). The distributions of relative power values were  
211 then log-transformed ( $\log(x/1-x)$ ), to convert them to Gaussian (Gasser et al., 1982) (Figure 1D).  
212 We then estimated the variable  $z$  by normalizing the Gaussian relative power distribution using  $z$ -score  
213 normalization:

214  $z = \frac{x-\mu}{\alpha}$ , where  $\mu$  is the recording mean of the transformed variable  $x$  and  $\alpha$  is its standard deviation

215 (Figure 1D).

## 216 Detection of movements

217 The acceleration signal went through a moving average filter with a sliding window of 10 msec. A  
218 positive threshold was applied to the resulting signal in order to assess when the monkey was moving. To  
219 be considered a movement, the filtered signal had to stay above the threshold for at least 300 ms and if the  
220 time lag between two consecutive movements was less than 3 sec they were merged together and treated  
221 as a single movement. The outcome was a binary vector of the same size as the original acceleration  
222 signal with 1 meaning “animal moving” and 0 meaning “animal resting”. For each 6-sec epoch prior to  
223 stimulation onset, we assessed the amount of movement by calculating the percent of time the animal was  
224 moving during each epoch. Consequently, we assigned a number ranging from 0 to 100 which expressed  
225 the amount of movement for each epoch (e.g. 60 means that the animal moved for 60 percent of the total  
226 epoch duration).

## 227 Classification of brain states

228 For each electrode signal we obtained a set of 7 features characterizing the 6-sec epochs throughout the  
229 recording:

- 230 1. Amount of movement (assessed by the acceleration signal)
- 231 2. Room light ON and OFF (assessed by the time of the epoch, i.e. light OFF between 6pm and  
232 7am)
- 233 3. Z-scored distribution of relative power in delta band (delta-power)
- 234 4. Z-scored distribution of relative power in theta band (theta-power)
- 235 5. Z-scored distribution of relative power in alpha band (alpha-power)
- 236 6. Z-scored distribution of relative power in beta band (beta-power)
- 237 7. Z-scored distribution of relative power in gamma band (gamma-power)

238 The algorithm for classification of brain states relied on the presence of movement and the contribution of  
239 different power bands to the cortical signal relative to a threshold value, which defined what was  
240 considered “high” or “low” power in all bands. Each epoch belonged to one of the following brain states  
241 when the following conditions were met:

- 242 - Active-wake (AW): presence of movement during more than 60% of the duration of an epoch
- 243 - Resting-wake (RW): presence of movement during less than 60% of epoch duration, high alpha-  
244 power (i.e. greater than threshold value), high beta-power, high gamma-power, low relative theta  
245 power (i.e. smaller than threshold value), low delta-power
- 246 - REM sleep: Light off, movement less than 60% of epoch duration, high theta-power, low delta-  
247 power
- 248 - NREM sleep: Light off, movement less than 60% of epoch duration, high delta-power

249 Because we applied the Z-score transformation, the relative-power in all different bands was scaled such  
250 that the weighting of any relative power feature did not play a more important role than any other. In this  
251 way we could define a unique threshold power value for all the frequency bands. This method ensured

252 that multiple states were not assigned to the same epoch; at the same time, if one of the conditions was  
253 not met, the epoch was considered unclassified. In order to find the best threshold value to discriminate  
254 the four brain states we calculated the number of unclassified epochs for each recording site as a function  
255 of different threshold values ranging from -3 to 3 in steps of 0.1 (Figure 1C). We then used the threshold  
256 value which minimized the number of unclassified epochs (Figure 1C).

257 The choice of 60% of epoch duration in order to assess AW epochs was dictated by a combination of  
258 observations. To assess when the animal was moving we used the acceleration signal and we merged  
259 together consecutive movements when the time lag between the two was less than 3 seconds. The 40 % of  
260 6 seconds (100%-60%) corresponds to a time period of 2.4 sec, which is below the 3 sec lag time. As a  
261 consequence the movement threshold of 60% was chosen because it corresponded to a reasonable time  
262 period consistent with the criteria used to analyze the acceleration signal. Moreover, for animal M2 a  
263 movement threshold of 60% returned a balanced number of AW epochs versus RW epochs, as shown in  
264 supplementary Figure S2 (<https://doi.org/10.6084/m9.figshare.12724739.v2>). For animal M1 the  
265 threshold which returned the same number of AW and RW epochs was at 85%. However the morphology  
266 of the classified VEPs did not show any drastic differences when the movement threshold was set at 85%  
267 (Figure S2, <https://doi.org/10.6084/m9.figshare.12724739.v2>).

## 268 **Compilation of vagal-evoked potentials**

269 Stimulus-triggered averages of ECoG activity in all recording sites were compiled to produce vagal-  
270 evoked potentials (VEPs). The stimulation artifact was suppressed by linear interpolation between single  
271 voltage samples 0.2 ms before and 2 ms after the onset of each pulse in a VNS train. In order to assess  
272 how the brain state modulated VEPs, neural recording traces around the stimulation onset (between 100  
273 ms before and 900 ms after the first stimulus in a train) were assigned to the brain state classified from the  
274 6-sec epoch that immediately preceded the onset of a stimulus train. VEPs associated with a given state  
275 were then compiled by averaging all the single traces assigned to that state. Since there were multiple

276 sleep cycles during a given 10-13 hour-long experiment, single traces assigned to a given state were not  
277 necessarily recorded during the same cycle.

278 For each recording site, classified VEPs were characterized by quantifying the amplitude of the biggest  
279 deflection (either positive or negative) of each of 3 VEP components. Each VEP component was defined  
280 by a latency window, measured from the first pulse in the stimulation train: an early component between  
281 5ms and 70ms, an intermediate component between 70ms and 250ms, and a late component between  
282 250ms and 600ms. The 3 latency windows were defined empirically and with practical considerations in  
283 mind, as the variability of the VEP shapes across animals, brain states and cortical sites made it  
284 impossible to quantify each VEP deflection on its own and still organize the results in a sufficiently  
285 compact manner. The criteria for defining the 3 latency windows were:

286 a) Short latency window: we defined this window to capture the early VEP portion that remained  
287 relatively invariant with respect to brain state. Typically, this was a single, monophasic or biphasic  
288 component.

289 b) Intermediate latency window: VEP deflections in the range 70-250 ms were quite variable  
290 between brain states and animals. Subdividing this window into more than one smaller window did not  
291 offer any more insights into the modulation of VEPs by brain state: quantifying the amplitude of  
292 individual deflections in this range provided several VEP measures that had little consistency between  
293 animals and brain states. The neurophysiological mechanisms underlying each of those deflections was  
294 also unclear. For these reasons, we decided to treat VEP deflections between the short- and long-latency  
295 windows together, in a single window. The downside of this approach is that the amplitude measurement  
296 in this window is sensitive to relative changes in the amplitude of individual waves, which may explain  
297 some of the polarity changes we observed.

298 c) Long latency window: the portion of the VEP with long latencies, typically >250-600 ms, was  
299 almost always a single, slow negative deflection, large in amplitude, modulated strongly by brain state.



300 Beside amplitude we also evaluated additional VEP measurements, such as the peak-to-trough and the  
301 root-mean-square (RMS) of each component. The RMS is an approximation of the area under the curve  
302 and is affected by the amplitude (maximum deflection) but also by the duration of the non-zero  
303 components of the VEP. All these measurements returned comparable results with respect to brain state  
304 modulation.

305 In order to quantify the variability of the individual evoked responses for a given brain state, we estimated  
306 the single-trace amplitude by taking the inner product of each classified tracing with the normalized VEP  
307 associated with that brain state. More specifically, the VEP associated with a certain brain state  $S$  was  
308 defined as:

$$309 \quad VEP_s = \frac{1}{n} \sum_{i=1}^n u_{is}$$

310 where  $u_{is}$  ( $i=1,2,\dots,n$ ) were all the single tracings belonging to the brain state  $S$ . By normalizing the  $VEP_s$   
311 by the square-root of the average power we obtained the “template waveform” for brain state  $S$ :

$$312 \quad \underline{v}_s = \frac{1}{b} VEP_s$$

313

314 Where:

$$315 \quad b = \sqrt{\frac{1}{n} \sum_{k=1}^n u_{is}^2}$$

316 This in turn was used to calculate the single-trial amplitude  $A_{is}$ , taken as the inner product between a  
317 single trial trace belonging to brain state  $S$  and the template waveform for that brain state:

$$318 \quad A_{is} = u_{is} \cdot \underline{v}_s$$

319 This approach takes the shape and the size of the entire waveform into account, rather than using just a  
320 few points from each waveform. Thus, not only the larger deflection from zero, but also a greater  
321 similarity to the average waveform led to a larger single trial amplitude. This measurement provided a  
322 direct comparison of the single trial variability among brain states.

### 323 Statistical analysis

324 To assess whether the brain state modulation was independent of the VNS parameters we compiled  
325 separately the VEPs for each stimulation protocol. The three-way analysis of variance (ANOVA) was  
326 used in order to test for statistically significant differences in the VEP components magnitude across brain  
327 states, across VNS protocols and across cortical areas. We also performed a pairwise comparison test of  
328 means, with Bonferroni correction, between brain states.

## 329 Results

### 330 Classification of brain states

331 The classification algorithm based on the power spectrum of the cortical signal, the accelerometer signal  
332 and the time of day, discriminated four different brain states: activity indicative of active wake (AW),  
333 activity indicative of resting wake (RW), activity indicative of REM sleep and activity indicative of  
334 NREM sleep (Figure 2). The AW state, defined as acceleration value above zero for most of the duration  
335 of the 6 seconds epoch, occurred predominant during day time with some brief periods during nighttime  
336 (Figure 2C); the associated cortical signal was characterized by more power in beta and gamma  
337 frequencies compared to the other three states (Figure 2A, 3A). RW, REM and NREM were defined by  
338 relative contributions of five frequency bands to the total cortical power in the frequencies between [1-55]  
339 Hz. REM sleep was characterized by more power in theta band than in any other frequency band, while  
340 NREM sleep was characterized by high amplitude oscillations in delta band (Figure 2A, 3A). RW showed  
341 higher contribution of alpha frequency band which is typically associated to a resting state (Pfurtscheller  
342 et al., 1996) (Figure 2A, 3A). The percent of time spent in NREM sleep decreased as the night progressed  
343 for both animals in all recordings (Figure 2C, Figure S3,  
344 <https://doi.org/10.6084/m9.figshare.12724739.v2>), which is typical for non-human primates (Daley et

345 al., 2006; Rachalski et al., 2014). Although we assigned brain states at much finer timescale than what has  
346 been previously used in sleep staging studies in monkeys (Hsieh et al., 2008) (10 s-long epochs vs. 10-30  
347 min-long epochs), we observed similar overall patterns: REM episodes clustered in time and were  
348 generally brief (3-10 min in duration), whereas NREM episodes were longer (20-40 min long) (Figure  
349 2D, Figure 3B). For simplicity, we chose to follow the standard terminology (i.e. awake, REM sleep,  
350 NREM sleep), although our brain states classification strategy differs in several ways from the standard  
351 methodology. Even though our brain state classification was performed for each cortical site  
352 independently, most cortical sites “reported” the same brain state at each epoch (Figure 3B). Interestingly,  
353 for a given epoch, requiring that all cortical sites report the same brain state in order for that epoch to be  
354 assigned to that brain state, had little effect on the sequence of epochs assigned to awake states, moderate  
355 effect on that of NREM sleep states and significant effect on the that of REM sleep states (Figure S3B,  
356 <https://doi.org/10.6084/m9.figshare.12724739.v2>). Delivery of VNS did not affect the structure of brain  
357 states as the global number of transitions between states was not altered by the presence of stimulation  
358 itself nor by any specific VNS protocol (Figure S4, <https://doi.org/10.6084/m9.figshare.12724739.v2>).

### 359 Effect of brain state on VEP responses

360 Cortical VEPs elicited by delivering trains of electrical stimuli to the vagus nerve were characterized by  
361 three main components, early, intermediate and late, whose polarity and magnitude were dependent on  
362 cortical area and brain state (Figure 4); there were also differences between the two subjects. Nonetheless,  
363 in both animals, only specific components of the VEP were modulated by brain state. Specifically, the 2  
364 later VEP components were strongly modulated by brain state, especially at higher frequencies in both  
365 animals ( $p < 0.001$  for both components and both animals in 3-way ANOVA for max deflection magnitude  
366 and RMS) (Figure 5, 6). The early component did not show significant dependence on brain state, with  
367 regards to both maximum deflection amplitude ( $p = 0.47$  for M1,  $p = 0.58$  for M2 in 3-way ANOVA) and  
368 RMS value ( $p = 0.2$  for M1,  $p = 0.17$  for M2). In contrast, the intermediate and late components of the  
369 VEPs had larger magnitudes during sleep than during wakefulness. Both components were larger during

370 REM sleep compared to either of the two awake states, although the difference was significant for both  
371 components only for M1 ( $p < 0.001$  pairwise comparisons Bonferroni corrected, for both max deflection  
372 magnitude and RMS). M2, instead, showed a significant difference in both magnitude and RMS during  
373 REM sleep compared to both awake states for the late component ( $p < 0.001$ , Bonferroni corrected), while  
374 the intermediate component was significantly different between the two awake states ( $p < 0.05$  for max  
375 deflection magnitude,  $p < 0.001$  for RMS), but not between resting state and REM sleep ( $p = 0.6$  for max  
376 deflection magnitude,  $p = 1$  for RMS, pairwise comparison Bonferroni corrected). The difference in the  
377 late component between the two awake states was not significant for both animals ( $p > 0.05$  for both max  
378 deflection amplitude and RMS). The 2 later components had the largest magnitude during NREM sleep  
379 (Figure 5, 6, 7): at 300Hz pulsing frequency, the intermediate component was 452% and 189% larger and  
380 the late component was 566% and 409% larger during NREM than awake in M1 and M2, respectively.

381 The same dependency of VEP magnitude on brain state was found when we considered the peak-to-  
382 trough measure for each of the three VEP components. This was expected given the strong linear  
383 correlation between the amplitude of maximum deflection and the peak-to-trough magnitude (Pearson  
384 correlation coefficient  $R = 0.94$ ,  $p < 0.001$  for M1 and  $R = 0.89$ ,  $p < 0.001$  for M2) (Figure 7D).

385 To quantify the variability in the shape of individual VEP responses across brain states, we first estimated  
386 the degree of similarity of individual stimulus-elicited cortical responses to the average VEP, by  
387 calculating the inner product of individual stimulus-elicited sweeps with the normalized average  
388 waveform for each brain state. The smallest variability, which correspond to larger IP values, in VEP  
389 shape occurred under NREM sleep for both animals, in all cortical sites (Figure 7C). The prefrontal sites  
390 of animal M2, but not M1, had small VEP variability also during REM sleep compared to awake states  
391 (Figure 7C).

### 392 Effect of pulsing frequency on VEP responses

393 VEP responses were significantly modulated by pulsing frequency ( $p < 0.001$  for peak deflection and RMS  
394 for all three components in both monkeys, 3-way ANOVA). Higher stimulation frequencies elicited larger

395 VEP responses in both monkeys, especially with regards to the intermediate and late components (Figure  
396 5). While the early component was less consistent, the intermediate and late components consistently had  
397 larger responses for higher pulsing frequencies (Figure 6). Higher pulsing frequencies also evoked VEPs  
398 which had a stronger modulation by brain state (Figure 6). Pulsing frequencies of at least 80Hz for M1  
399 and 30Hz for M2 were necessary in order to evoke responses that varied with brain states (Figure 6).  
400 In a separate analysis, we considered VEP responses elicited by trains with a pulsing frequency of 5 Hz  
401 (Figures 5, 8). This low pulsing frequency was not sufficient to evoke VEPs with 3 identifiable  
402 components (Figure 8). In some cases, each pulse in the train elicited a VEP with both early and  
403 intermediate components, and in other cases only the early component was evoked (Figure 8). Overall,  
404 the VEPs looked different from the VEPs evoked by higher frequencies and only some of the cortical  
405 sites showed brain state modulation (Figure 8, Figure S5,  
406 <https://doi.org/10.6084/m9.figshare.12724739.v2>).

#### 407 VEP responses in different cortical areas

408 In order to establish the dependency of VEP responses on cortical area, we compared the magnitude,  
409 polarity and latency of the main deflection of each VEP component elicited by 300Hz VNS across groups  
410 of cortical sites (prefrontal, sensorimotor, parietal and thalamic) for each brain state (Figure 7).  
411 In animal M1, the early component had small amplitude and high variability, in both magnitude and  
412 latency, at the frontal and sensorimotor sites, while the responses at the parietal and thalamic sites were  
413 positive and consistently larger (Figure 7A, 7B). In animal M2 the early component was positive at the  
414 prefrontal and sensorimotor sites and negative at the parietal sites (Figure 7A). The prefrontal sites  
415 showed a consistently larger early component compared to other cortical areas for M2 (Figure 7A). Both  
416 animals had smaller early component magnitudes for sensorimotor sites compared to other cortical areas  
417 (Figure 7A). No obvious brain-state modulation of either magnitude or latency was observed for the early  
418 component.

419 In M1, the intermediate component was positive for all areas and brain states except at prefrontal sites,  
420 which showed a polarity switch from negative, during AW, RW and REM, to positive during NREM  
421 sleep (Figure 7A). The intermediate component for M2 was more variable across cortical areas. It was  
422 large and always positive in prefrontal sites, while in sensorimotor sites its magnitude was smaller and it  
423 switched polarity from negative during wake states to positive during sleep states (Figure 7A). The same  
424 component in parietal sites showed a polarity switch from negative during AW, RW and REM to positive  
425 during NREM sleep (Figure 7A). The peak latency for both animals did not show strong dependence on  
426 brain state (Figure 7B).

427 In M1 the late component was negative with relatively consistent latencies across all cortical sites and  
428 brain states (Figure 7A, 7B). In M2 the magnitude of the late component was almost absent during awake  
429 states in all cortical areas, while during sleep states it was large, negative and with consistent latency  
430 (Figure 7A, 7B). The prefrontal sites in M2 showed larger magnitude compared to other cortical areas. In  
431 both animals the peak latency of this component was similar across cortical areas and was not modulated  
432 by brain state (Figure 7B).

## 433 Discussion

### 434 Brain-state modulation of VEPs and its origins

435 In this study we investigated the modulation by ongoing cortical activity of the cortical responses evoked  
436 by cervical VNS in 2 freely behaving monkeys. To our knowledge, this is the first study to systematically  
437 document VEPs in nonhuman primates. The VEP responses were not identical between the 2 animals,  
438 even though the cortical areas sampled were the same. That difference could be attributed to differences  
439 in the way the cortical electrodes were fabricated and inserted into the brain, as well as in the exact  
440 location of the cortical electrodes, which was determined using non-subject-specific stereotaxic  
441 coordinates. It could also be related to the different implant age between the 2 subjects at the time of  
442 conducting these experiments (M1 had older implant than M2).

443 Four states of cortical activity were distinguished based on the power of different frequency ranges in the  
444 local field potentials (LFP) and the presence of movement: activity indicative of wakefulness in the  
445 presence of overt movement, activity indicative of wakefulness in the absence of movement, activity  
446 indicative of REM sleep and activity indicative of NREM sleep. Even though LFP power correlates with  
447 brain states, those are usually defined with more comprehensive measures including electromyography,  
448 instead of head acceleration used in our study, and electro-oculography, which provides information on  
449 eye movements (Rechtschaffen, 1968). In that sense, we cannot claim that “brain states” in our definition  
450 are necessarily the same as stages of sleep and wakefulness, only that they are indicative of them, as they  
451 share the same LFP criteria.

452 Moreover, in the originally defined standard criteria of sleep stage classification (Rechtschaffen, 1968)  
453 one electrode of the EEG montage, usually C3 or C4 in the international 10-20 system, is used to infer  
454 sleep stage. Instead of using a single cortical site to assess the power contribution in different frequency  
455 bands, we treat the ECoG sites as independent from each other allowing the classification to be free from  
456 the assumption that all sites are in the same state at the same time. For example, the phenomenon of local  
457 sleep has been described in aquatic mammals, birds, and humans (Mascetti, 2016). Therefore, an  
458 approach free from the assumption that all parts of the brain are in the same state at the same time may  
459 more representative of the ongoing neurophysiology during sleep. We found that the requirement that all  
460 cortical sites reported the same brain state before being assigned to that brain state, had minimal effect on  
461 the sequence of epochs with awake states, moderate effect on the sequence of epochs indicative of NREM  
462 sleep and significant effect on the sequence of epochs indicative of REM sleep (Figure S3B,  
463 <https://doi.org/10.6084/m9.figshare.12724739.v2>). Therefore, we find limited support for the  
464 assumption that when a “standard” EEG site (e.g. C3 or C4) reports a state, that state is representative of  
465 the states of the rest of cortical sites. This strategy allowed us to directly assess how LFP oscillatory  
466 dynamics at cortical sites, which correlates with brain states, modulated vagal evoked potentials at those  
467 sites.

468 VEPs were characterized by the latency and magnitude of 3 components: early (<70 ms post-stimulus),  
469 intermediate (70-250 ms) and late (>250 ms). We found that brain state affected the magnitude of VEPs,  
470 especially of the 2 later components. Those 2 VEP components showed a progressive increase in  
471 magnitude from epochs indicative of wakefulness to those indicative of sleep, reaching maximum  
472 magnitude during delta dominant activity (NREM sleep) (Figure 6). It is unclear what cortical  
473 mechanisms are responsible for the generation of different components of VEPs, in sleep or awake states.  
474 Using transcranial magnetic stimulation (TMS) Massimini et al. (Massimini et al., 2007) triggered  
475 cortical responses in the form of slow oscillations (SOs) in sleeping humans. Slow oscillations (SOs)  
476 during NREM sleep represent the synchronous alternation between depolarized (“up-state”) and  
477 hyperpolarized (“down-state”) membrane potential of cortical neurons (Steriade et al., 1993b;  
478 McCormick and Bal, 1997; Destexhe et al., 1999). In our study, the 2 later VEP components during sleep  
479 lasted approximately 500 ms, similar to the TMS-evoked responses in Massimini et al. (Massimini et al.,  
480 2007) (Figure 4, 5). In both our and their (Massimini et al., 2007) studies, evoked responses were state-,  
481 dose- and cortical site-dependent (Figure 5, 6, 7). The prefrontal sites showed larger VEPs for M2 (Figure  
482 7) and for M1 the magnitude of the 2 later components increased monotonically with pulsing frequency  
483 (Figure 6). These results suggest that VNS during NREM sleep evokes dose-dependent, SO-like  
484 responses in the cortex.

485 Importantly, the number of transitions between brain states was not altered by the presence of stimulation  
486 nor by the dose of stimulation (Figure S4, <https://doi.org/10.6084/m9.figshare.12724739.v2>), at least  
487 with the relatively short VNS train tested in our study. Among other sleep parameters, changes in the  
488 duration of REM and slow-wave sleep cycles have been described in association with clinical VNS,  
489 typically delivered in 30 s-ON/5 min-OFF periods (Romero-Osorio et al., 2018). Our results suggest that  
490 shorter ON periods may be less prone to affecting sleep cycles.

491 In contrast to the 2 later components, the early VEP component did not change between awake and sleep  
492 states (Figure 6). This difference could be explained by activation of two different circuits by VNS. The



493 early VEP component, possibly myogenic in origin (Hammond et al., 1992a), could represent the  
494 activation of a relatively direct anatomical pathway involving the nucleus of the solitary tract and possibly  
495 other first or second-order nuclei that project to the thalamus and cortex (Berthoud and Neuhuber, 2000;  
496 Gamboa-Esteves et al., 2001). In addition to motor innervation of laryngeal and pharyngeal muscles, the  
497 vagus also provides afferent innervation to other structures of the larynx, including somatosensory  
498 innervation of laryngeal and pharyngeal mucosa and proprioceptive innervation of laryngeal muscles and  
499 joints (Puizillout, 2005). Stimulus-elicited contraction of laryngeal muscles could activate those afferents,  
500 thereby producing afferent volleys that manifest as stimulus-evoked potentials in sensorimotor cortical  
501 areas (Sasaki et al., 2017). This would explain the disappearance of VEPs when muscle contraction was  
502 blocked (Hammond et al., 1992a). Another part of the short-latency response could be due to activation of  
503 large, afferent somatic afferents.

504 The later VEP components, on the other hand, could reflect activation of longer polysynaptic pathways,  
505 mediated by relays in the brainstem, midbrain, hypothalamus, hippocampus, thalamus and cortex (Henry,  
506 2002). In contrast to the early component, later components of the VEPs showed dose-dependence,  
507 suggesting more significant temporal synaptic summation, consistent with a polysynaptic pathway.  
508 Although the cervical vagus involves sensory fiber populations with different sizes, myelination  
509 properties and conduction velocities (Agostoni et al., 1957), it is unlikely that activation of faster or  
510 slower fibers alone can account for the different VEP components, since the different conduction  
511 velocities give rise to latency differences that are at least one order of magnitude smaller than the  
512 latencies seen in the VEPs. Even though there were instances of polarity reversal across brain states, those  
513 were limited to the intermediate-latency VEP component; in those cases, those components were  
514 relatively small in amplitude (<50uV peak amplitude) (e.g. Figure 7A, middle panel, for both subjects).  
515 This likely reflects the heterogeneity and variability of the waves included in the intermediate-latency  
516 component and the fact that only one of them (the largest in each VEP) contributed to the reported

517 measurement: sometimes a positive wave was the largest, whereas in other instances the negative was the  
518 largest.

519 Brainstem and midbrain areas that receive afferent inputs from the NTS, largely project to the cortex via  
520 the thalamus (Berthoud and Neuhuber, 2000; Henry, 2002). Therefore the large-scale changes in thalamo-  
521 cortical circuits occurring during sleep (McCormick and Bal, 1997) could play a role in modulating the  
522 cortical responses elicited by VNS. The thalamus is a major gateway into the cerebral cortex and the first  
523 station at which incoming signals can be blocked by synaptic inhibition during sleep. Thalamo-cortical  
524 and cortico-cortical interactions contribute to the changes that brain activity undergoes during the switch  
525 from an aroused state, more receptive to “external” signals, to a more isolated sleep state, which is driven  
526 by “internal”, oscillatory activity (McCormick and Bal, 1997; Sanchez-Vives and McCormick, 2000;  
527 Steriade, 2004). The brain state dependence of VEPs suggests that the effect of ascending volleys  
528 generated by VNS on cortical activity is shaped by the state of ongoing thalamo-cortical and cortico-  
529 cortical interactions, much like other sensory evoked potentials. During NREM sleep K-complexes and  
530 vertex sharp waves can be evoked by auditory or other sensory stimuli (Colrain et al., 1999; Colrain et al.,  
531 2000a; Colrain et al., 2000b). Likewise, cortical TMS pulses delivered during sleep trigger the generation  
532 of delta waves (Massimini et al., 2007). Therefore, during sleep, slow oscillations, K-complexes and  
533 vertex sharp waves, could all contribute to the responses evoked by stimulation, manifesting as larger  
534 intermediate- and long-latency VEPs. The fact that the relatively long latency, slower components of the  
535 VEPs were the ones mostly augmented during NREM sleep, agrees with the shift to slower spontaneous  
536 EEG components in that sleep stage, such as delta waves and K-complexes. The shift to larger in  
537 amplitude and slower in time-course stimulus-evoked and spontaneous signatures of cortical activity  
538 during NREM may reflect neuronal synchronization across larger cortical and subcortical neuronal  
539 populations, which has been demonstrated in that sleep stage (Scammell et al., 2017).

540 Interestingly, several studies demonstrated that the balance between parasympathetic and sympathetic  
541 activity changes during sleep. Spectral analysis of heart rate variability, a measure of autonomic activity,

542 showed an increase of parasympathetic tone during NREM sleep (Berlad et al., 1993; Trinder et al., 2001;  
543 Mendez et al., 2006; Cabiddu et al., 2012). Increased vagal tone could be mediated by increased efferent  
544 vagal activity, but also by increased responsiveness of the afferent vagus to peripheral stimuli (Laborde et  
545 al., 2018). Thus, increased vagal tone during sleep might contribute to a larger VEP compared to evoked  
546 responses elicited by the same stimuli during waking.

#### 547 Effect of pulsing frequency on cortical responses to VNS

548 In this study we delivered trains of pulses at pulsing frequencies ranging from 5 Hz to 300 Hz. For all  
549 brain states, VEPs recorded from different cortical areas had higher amplitudes at the highest pulsing  
550 frequency (300 Hz) than at the lowest pulsing frequency (5 Hz) (Figure 5). Monkey M1, in particular,  
551 showed a monotonic increase in the magnitude of the 2 later components with increasing pulsing  
552 frequency (Figure 6). Such monotonic relationship is different from the inverted-U-shaped relationship to  
553 a number of brain function readouts described previously. For example, a pulsing frequency around 30Hz  
554 resulted in an increased cortical map plasticity, whereas higher or lower VNS frequencies failed to induce  
555 plasticity effects (Buell et al., 2018; Buell et al., 2019). The reasons for this discrepancy are not clear. It  
556 could be due to the differences in number of VNS pulses delivered, but it could also be that the read-out  
557 of VNS in our study, evoked cortical activity, correlates poorly with VNS outcomes used in other studies,  
558 like cortical map plasticity or behavioral recovery. Our results could in principle be explained by temporal  
559 summation of synaptic responses to VNS. For example, temporal summation could happen at the level of  
560 NTS; in monosynaptically-driven NTS, excitatory post-synaptic potentials last for 10-20 ms, and  
561 therefore temporal summation would occur at frequencies above 50-100 Hz (Austgen et al., 2011).  
562 Similarly, studies have found a monotonic relationship between pulsing frequency and neuronal firing in  
563 locus coeruleus, also suggesting a potential temporal summation mechanism for frequency dependency  
564 (Hulseley et al., 2017). Given the breadth and heterogeneity of brain networks activated by VNS, it is likely  
565 that the dependence of brain effects on pulsing frequency arises from complex interactions between  
566 temporal summation at some synapses, the firing properties of activated neurons at different brain sites  
567 and the conduction delays of different pathways engaged by VNS.

## 568 VNS and targeted neuroplasticity

569 Studies in animal models have shown that electrically stimulating the vagus nerve leads to a release of  
570 plasticity-related neuromodulators in the brain, including acetylcholine and norepinephrine (Nichols et al.,  
571 2011). Those neuromodulators regulate plasticity by acting as ‘on-off switches’ which enable plastic  
572 changes to occur by engaging synaptic processes (Kilgard and Merzenich, 1998; Sara, 2009; Sara and  
573 Bouret, 2012). Sleep has been shown to play a crucial role for skill learning and memory consolidation  
574 (Huber et al., 2004; Rasch and Born, 2013; Gulati et al., 2014) and direct manipulation of brain activity  
575 during sleep can result in changes in task performance (Gulati et al., 2017; Rembado et al., 2017; Ketz et  
576 al., 2018; Kim et al., 2019). Although the mechanisms underlying off-line learning are not entirely  
577 understood, one possibility involves the autonomic nervous system (ANS) (Whitehurst et al., 2016). In  
578 particular, Whitehurst et al. (Whitehurst et al., 2016) showed that improvements in tests of associative  
579 memory were associated with ANS activity mediated by the vagus nerve during REM sleep. It has been  
580 shown that stimulation of the vagus nerve affects task performance when it is paired with active training  
581 (Pruitt et al., 2016), but it is unknown whether VNS could have different cognitive effects when delivered  
582 during different brain states, including sleep. Our findings argue that this could be a possibility. If true,  
583 this would have significant implications in the use of VNS, and other methods of neuromodulation, to  
584 enhance neuroplasticity in healthy subjects and in patients with neurological disease.

## 585 VNS and interoception

586 The vagus is the main conduit for interoceptive sensory signals, supporting conscious and unconscious  
587 perception of bodily events and states (Paciorek and Skora, 2020). Afferent visceral signals related to  
588 physiological events, like heart rhythm and breathing, are conveyed by the vagus and elicit event-related  
589 potentials that are measurable with intracranial EEG. Examples are the heartbeat-evoked cortical potential  
590 (Park et al., 2018) and cortical activity related to breathing (Herrero et al., 2018). Such cortical signatures  
591 of visceral physiology reflect population-level aspects of processes by which the brain integrates and  
592 interprets interoceptive information (Paciorek and Skora, 2020). It is unknown how these signatures are  
593 modulated by ongoing cortical activity and our study offers some insight. The fact that the same vagal

594 afferent volley leads to different cortical responses depending on brain state (e.g. smaller response during  
595 wakefulness than during NREM sleep) indicates that vagal interoceptive information conveyed at  
596 different times of day and during different mental and behavioral states may shape how the continuous  
597 stream of visceral signals affects motivational states, adaptive behavior and emotion (Critchley and  
598 Harrison, 2013).

599

#### 600 **Conflict of interest statement**

601 The authors declare no competing financial interest.

#### 602 **Acknowledgments**

603 This work was supported by NIH grants RO1 NS12542 and RR00166 to E.F.

604 Current affiliation for Irene Rembado: Allen Institute for Brain Science, 615 Westlake Ave N., Seattle,  
605 WA 98103

606 Current affiliation for David K. Su: Providence Regional Medical Center Cranial Joint and Spine Clinic,  
607 Everett, WA 98201

608

609 Corresponding authors: Irene Rembado: irene.rembado@gmail.com, Stavros Zanos:  
610 szanos@northwell.edu

611

#### 612 **Author contributions**

613 I.R. analyzed data, interpreted results, wrote the paper

614 D.S. performed surgeries for vagus nerve implant

615 A.L. collected data

616 L.S. hardware and software development of Neurochip

617 E.F., S.P. interpreted results

618 S.Z. performed surgeries for cortical implant, designed experiments, interpreted results, wrote the paper

#### 619 **References**

620 Agostoni E, Chinnock JE, De Daly MB, Murray JG (1957) Functional and histological studies of the vagus  
621 nerve and its branches to the heart, lungs and abdominal viscera in the cat. J Physiol 135:182-  
622 205.

623 Armitage R (1995) The distribution of EEG frequencies in REM and NREM sleep stages in healthy young  
624 adults. Sleep 18:334-341.

- 625 Austgen JR, Hermann GE, Dantzer HA, Rogers RC, Kline DD (2011) Hydrogen sulfide augments synaptic  
626 neurotransmission in the nucleus of the solitary tract. *J Neurophysiol* 106:1822-1832.
- 627 Babadi B, Brown EN (2014) A review of multitaper spectral analysis. *IEEE Trans Biomed Eng* 61:1555-  
628 1564.
- 629 Berlad II, Shlitner A, Ben-Haim S, Lavie P (1993) Power spectrum analysis and heart rate variability in  
630 Stage 4 and REM sleep: evidence for state-specific changes in autonomic dominance. *J Sleep Res*  
631 2:88-90.
- 632 Berthoud HR, Neuhuber WL (2000) Functional and chemical anatomy of the afferent vagal system.  
633 *Auton Neurosci* 85:1-17.
- 634 Buell EP, Borland MS, Loerwald KW, Chandler C, Hays SA, Engineer CT, Kilgard MP (2019) Vagus Nerve  
635 Stimulation Rate and Duration Determine whether Sensory Pairing Produces Neural Plasticity.  
636 *Neuroscience* 406:290-299.
- 637 Buell EP, Loerwald KW, Engineer CT, Borland MS, Buell JM, Kelly CA, Khan, II, Hays SA, Kilgard MP (2018)  
638 Cortical map plasticity as a function of vagus nerve stimulation rate. *Brain Stimul* 11:1218-1224.
- 639 Cabiddu R, Cerutti S, Viardot G, Werner S, Bianchi AM (2012) Modulation of the Sympatho-Vagal Balance  
640 during Sleep: Frequency Domain Study of Heart Rate Variability and Respiration. *Front Physiol*  
641 3:45.
- 642 Cao B, Wang J, Shahed M, Jelfs B, Chan RH, Li Y (2016) Vagus Nerve Stimulation Alters Phase Synchrony  
643 of the Anterior Cingulate Cortex and Facilitates Decision Making in Rats. *Sci Rep* 6:35135.
- 644 Car A, Jean A, Roman C (1975) A pontine primary relay for ascending projections of the superior  
645 laryngeal nerve. *Exp Brain Res* 22:197-210.
- 646 Charbonnier S, Zoubek L, Lesecq S, Chapotot F (2011) Self-evaluated automatic classifier as a decision-  
647 support tool for sleep/wake staging. *Comput Biol Med* 41:380-389.
- 648 Cheyuo C, Jacob A, Wu R, Zhou M, Coppa GF, Wang P (2011) The parasympathetic nervous system in the  
649 quest for stroke therapeutics. *J Cereb Blood Flow Metab* 31:1187-1195.
- 650 Colrain IM, Webster KE, Hirst G (1999) The N550 component of the evoked K-complex: a modality non-  
651 specific response? *J Sleep Res* 8:273-280.
- 652 Colrain IM, Di Parsia P, Gora J (2000a) The impact of prestimulus EEG frequency on auditory evoked  
653 potentials during sleep onset. *Can J Exp Psychol* 54:243-254.
- 654 Colrain IM, Webster KE, Hirst G, Campbell KB (2000b) The roles of vertex sharp waves and K-complexes  
655 in the generation of N300 in auditory and respiratory-related evoked potentials during early  
656 stage 2 NREM sleep. *Sleep* 23:97-106.
- 657 Critchley HD, Harrison NA (2013) Visceral influences on brain and behavior. *Neuron* 77:624-638.
- 658 Critchley HD, Garfinkel SN (2017) Interoception and emotion. *Curr Opin Psychol* 17:7-14.
- 659 Daley JT, Turner RS, Freeman A, Bliwise DL, Rye DB (2006) Prolonged assessment of sleep and daytime  
660 sleepiness in unrestrained Macaca mulatta. *Sleep* 29:221-231.
- 661 Dawson J, Pierce D, Dixit A, Kimberley TJ, Robertson M, Tarver B, Hilmi O, McLean J, Forbes K, Kilgard  
662 MP, Rennaker RL, Cramer SC, Walters M, Engineer N (2016) Safety, Feasibility, and Efficacy of  
663 Vagus Nerve Stimulation Paired With Upper-Limb Rehabilitation After Ischemic Stroke. *Stroke*  
664 47:143-150.
- 665 Destexhe A, Contreras D, Steriade M (1999) Spatiotemporal analysis of local field potentials and unit  
666 discharges in cat cerebral cortex during natural wake and sleep states. *J Neurosci* 19:4595-4608.
- 667 Di Lazzaro V, Oliviero A, Pilato F, Saturno E, Dileone M, Meglio M, Colicchio G, Barba C, Papacci F, Tonali  
668 PA (2004) Effects of vagus nerve stimulation on cortical excitability in epileptic patients.  
669 *Neurology* 62:2310-2312.
- 670 Elger G, Hoppe C, Falkai P, Rush AJ, Elger CE (2000) Vagus nerve stimulation is associated with mood  
671 improvements in epilepsy patients. *Epilepsy Res* 42:203-210.



- 672 Engineer CT, Engineer ND, Riley JR, Seale JD, Kilgard MP (2015) Pairing Speech Sounds With Vagus Nerve  
673 Stimulation Drives Stimulus-specific Cortical Plasticity. *Brain Stimul* 8:637-644.
- 674 Engineer ND, Riley JR, Seale JD, Vrana WA, Shetake JA, Sudanagunta SP, Borland MS, Kilgard MP (2011)  
675 Reversing pathological neural activity using targeted plasticity. *Nature* 470:101-104.
- 676 Fallgatter AJ, Ehlis AC, Ringel TM, Herrmann MJ (2005) Age effect on far field potentials from the brain  
677 stem after transcutaneous vagus nerve stimulation. *Int J Psychophysiol* 56:37-43.
- 678 Gamboa-Esteves FO, Lima D, Batten TF (2001) Neurochemistry of superficial spinal neurones projecting  
679 to nucleus of the solitary tract that express c-fos on chemical somatic and visceral nociceptive  
680 input in the rat. *Metab Brain Dis* 16:151-164.
- 681 Gasser T, Bacher P, Mocks J (1982) Transformations towards the normal distribution of broad band  
682 spectral parameters of the EEG. *Electroencephalogr Clin Neurophysiol* 53:119-124.
- 683 George MS, Nahas Z, Bohning DE, Kozel FA, Anderson B, Chae JH, Lomarev M, Denslow S, Li X, Mu C  
684 (2002) Vagus nerve stimulation therapy: a research update. *Neurology* 59:S56-61.
- 685 Gulati T, Ramanathan DS, Wong CC, Ganguly K (2014) Reactivation of emergent task-related ensembles  
686 during slow-wave sleep after neuroprosthetic learning. *Nat Neurosci* 17:1107-1113.
- 687 Gulati T, Guo L, Ramanathan DS, Bodepudi A, Ganguly K (2017) Neural reactivations during sleep  
688 determine network credit assignment. *Nat Neurosci* 20:1277-1284.
- 689 Hagen K, Ehlis AC, Schneider S, Haeussinger FB, Fallgatter AJ, Metzger FG (2014) Influence of different  
690 stimulation parameters on the somatosensory evoked potentials of the nervus vagus--how  
691 varied stimulation parameters affect VSEP. *J Clin Neurophysiol* 31:143-148.
- 692 Hammond EJ, Uthman BM, Reid SA, Wilder BJ (1992a) Electrophysiologic studies of cervical vagus nerve  
693 stimulation in humans: II. Evoked potentials. *Epilepsia* 33:1021-1028.
- 694 Hammond EJ, Uthman BM, Reid SA, Wilder BJ (1992b) Electrophysiological studies of cervical vagus  
695 nerve stimulation in humans: I. EEG effects. *Epilepsia* 33:1013-1020.
- 696 Hassert DL, Miyashita T, Williams CL (2004) The effects of peripheral vagal nerve stimulation at a  
697 memory-modulating intensity on norepinephrine output in the basolateral amygdala. *Behav*  
698 *Neurosci* 118:79-88.
- 699 Hays SA, Ruiz A, Bethea T, Khodaparast N, Carmel JB, Rennaker RL, 2nd, Kilgard MP (2016) Vagus nerve  
700 stimulation during rehabilitative training enhances recovery of forelimb function after ischemic  
701 stroke in aged rats. *Neurobiol Aging* 43:111-118.
- 702 Hennevin E, Huetz C, Edeline JM (2007) Neural representations during sleep: from sensory processing to  
703 memory traces. *Neurobiol Learn Mem* 87:416-440.
- 704 Henry TR (2002) Therapeutic mechanisms of vagus nerve stimulation. *Neurology* 59:S3-14.
- 705 Herrero JL, Khuvis S, Yeagle E, Cerf M, Mehta AD (2018) Breathing above the brain stem: volitional  
706 control and attentional modulation in humans. *J Neurophysiol* 119:145-159.
- 707 Huber R, Ghilardi MF, Massimini M, Tononi G (2004) Local sleep and learning. *Nature* 430:78-81.
- 708 Hulsey DR, Riley JR, Loerwald KW, Rennaker RL, 2nd, Kilgard MP, Hays SA (2017) Parametric  
709 characterization of neural activity in the locus coeruleus in response to vagus nerve stimulation.  
710 *Exp Neurol* 289:21-30.
- 711 Ito S, Craig AD (2005) Vagal-evoked activity in the parafascicular nucleus of the primate thalamus. *J*  
712 *Neurophysiol* 94:2976-2982.
- 713 Ketz N, Jones AP, Bryant NB, Clark VP, Pilly PK (2018) Closed-Loop Slow-Wave tACS Improves Sleep-  
714 Dependent Long-Term Memory Generalization by Modulating Endogenous Oscillations. *J*  
715 *Neurosci* 38:7314-7326.
- 716 Khalsa SS et al. (2018) Interoception and Mental Health: A Roadmap. *Biol Psychiatry Cogn Neurosci*  
717 *Neuroimaging* 3:501-513.
- 718 Kilgard MP, Merzenich MM (1998) Cortical map reorganization enabled by nucleus basalis activity.  
719 *Science* 279:1714-1718.

- 720 Kim J, Gulati T, Ganguly K (2019) Competing Roles of Slow Oscillations and Delta Waves in Memory  
721 Consolidation versus Forgetting. *Cell* 179:514-526 e513.
- 722 Krakovska A, Mezeiova K (2011) Automatic sleep scoring: a search for an optimal combination of  
723 measures. *Artif Intell Med* 53:25-33.
- 724 Laborde S, Mosley E, Mertgen A (2018) Vagal Tank Theory: The Three Rs of Cardiac Vagal Control  
725 Functioning - Resting, Reactivity, and Recovery. *Front Neurosci* 12:458.
- 726 Livingstone MS, Hubel DH (1981) Effects of sleep and arousal on the processing of visual information in  
727 the cat. *Nature* 291:554-561.
- 728 Marshall AC, Gentsch A, Schutz-Bosbach S (2018) The Interaction between Interoceptive and Action  
729 States within a Framework of Predictive Coding. *Front Psychol* 9:180.
- 730 Massimini M, Ferrarelli F, Huber R, Esser SK, Singh H, Tononi G (2005) Breakdown of cortical effective  
731 connectivity during sleep. *Science* 309:2228-2232.
- 732 Massimini M, Ferrarelli F, Esser SK, Riedner BA, Huber R, Murphy M, Peterson MJ, Tononi G (2007)  
733 Triggering sleep slow waves by transcranial magnetic stimulation. *Proc Natl Acad Sci U S A*  
734 104:8496-8501.
- 735 McCormick DA, Bal T (1997) Sleep and arousal: thalamocortical mechanisms. *Annu Rev Neurosci* 20:185-  
736 215.
- 737 Mendez M, Bianchi AM, Villantieri O, Cerutti S (2006) Time-varying analysis of the heart rate variability  
738 during REM and non REM sleep stages. *Conf Proc IEEE Eng Med Biol Soc* 1:3576-3579.
- 739 Metzger FG, Polak T, Aghazadeh Y, Ehlis AC, Hagen K, Fallgatter AJ (2012) Vagus somatosensory evoked  
740 potentials--a possibility for diagnostic improvement in patients with mild cognitive impairment?  
741 *Dement Geriatr Cogn Disord* 33:289-296.
- 742 Nichols JA, Nichols AR, Smirnakis SM, Engineer ND, Kilgard MP, Atzori M (2011) Vagus nerve stimulation  
743 modulates cortical synchrony and excitability through the activation of muscarinic receptors.  
744 *Neuroscience* 189:207-214.
- 745 Paciorek A, Skora L (2020) Vagus Nerve Stimulation as a Gateway to Interoception. *Front Psychol*  
746 11:1659.
- 747 Panagiotou M, Vyazovskiy VV, Meijer JH, Deboer T (2017) Differences in electroencephalographic non-  
748 rapid-eye movement sleep slow-wave characteristics between young and old mice. *Sci Rep*  
749 7:43656.
- 750 Park HD, Bernasconi F, Salomon R, Tallon-Baudry C, Spinelli L, Seeck M, Schaller K, Blanke O (2018)  
751 Neural Sources and Underlying Mechanisms of Neural Responses to Heartbeats, and their Role  
752 in Bodily Self-consciousness: An Intracranial EEG Study. *Cereb Cortex* 28:2351-2364.
- 753 Pfurtscheller G, Stancak A, Jr., Neuper C (1996) Event-related synchronization (ERS) in the alpha band--  
754 an electrophysiological correlate of cortical idling: a review. *Int J Psychophysiol* 24:39-46.
- 755 Polak T, Markulin F, Ehlis AC, Langer JB, Ringel TM, Fallgatter AJ (2009) Far field potentials from brain  
756 stem after transcutaneous vagus nerve stimulation: optimization of stimulation and recording  
757 parameters. *J Neural Transm (Vienna)* 116:1237-1242.
- 758 Polak T, Ehlis AC, Langer JB, Plichta MM, Metzger F, Ringel TM, Fallgatter AJ (2007) Non-invasive  
759 measurement of vagus activity in the brainstem - a methodological progress towards earlier  
760 diagnosis of dementias? *J Neural Transm (Vienna)* 114:613-619.
- 761 Porter BA, Khodaparast N, Fayyaz T, Cheung RJ, Ahmed SS, Vrana WA, Rennaker RL, 2nd, Kilgard MP  
762 (2012) Repeatedly pairing vagus nerve stimulation with a movement reorganizes primary motor  
763 cortex. *Cereb Cortex* 22:2365-2374.
- 764 Pritchard TC, Hamilton RB, Norgren R (2000) Projections of the parabrachial nucleus in the old world  
765 monkey. *Exp Neurol* 165:101-117.



- 766 Pruitt DT, Schmid AN, Kim LJ, Abe CM, Trieu JL, Choua C, Hays SA, Kilgard MP, Rennaker RL (2016) Vagus  
767 Nerve Stimulation Delivered with Motor Training Enhances Recovery of Function after Traumatic  
768 Brain Injury. *J Neurotrauma* 33:871-879.
- 769 Puizillout J-J (2005) Central projections of vagal afferents: Publibook.
- 770 Rachalski A, Authier S, Bassett L, Pouliot M, Tremblay G, Mongrain V (2014) Sleep  
771 electroencephalographic characteristics of the Cynomolgus monkey measured by telemetry. *J*  
772 *Sleep Res* 23:619-627.
- 773 Rasch B, Born J (2013) About sleep's role in memory. *Physiol Rev* 93:681-766.
- 774 Ravan M, Sabesan S, D'Cruz O (2017) On Quantitative Biomarkers of VNS Therapy Using EEG and ECG  
775 Signals. *IEEE Trans Biomed Eng* 64:419-428.
- 776 Rechtschaffen A, Kales, A. (1968) A Manual of Standardized Terminology: Techniques and Scoring  
777 System for Sleep Stages of Human Subjects.
- 778 Rembado I, Zanos S, Fetz EE (2017) Cycle-Triggered Cortical Stimulation during Slow Wave Sleep  
779 Facilitates Learning a BMI Task: A Case Report in a Non-Human Primate. *Front Behav Neurosci*  
780 11:59.
- 781 Sanchez-Vives MV, McCormick DA (2000) Cellular and network mechanisms of rhythmic recurrent  
782 activity in neocortex. *Nat Neurosci* 3:1027-1034.
- 783 Sara SJ (2009) The locus coeruleus and noradrenergic modulation of cognition. *Nat Rev Neurosci* 10:211-  
784 223.
- 785 Sara SJ, Bouret S (2012) Orienting and reorienting: the locus coeruleus mediates cognition through  
786 arousal. *Neuron* 76:130-141.
- 787 Sasaki R, Kotan S, Nakagawa M, Miyaguchi S, Kojima S, Saito K, Inukai Y, Onishi H (2017) Presence and  
788 Absence of Muscle Contraction Elicited by Peripheral Nerve Electrical Stimulation Differentially  
789 Modulate Primary Motor Cortex Excitability. *Front Hum Neurosci* 11:146.
- 790 Scammell TE, Arrigoni E, Lipton JO (2017) Neural Circuitry of Wakefulness and Sleep. *Neuron* 93:747-  
791 765.
- 792 Seth AK (2013) Interoceptive inference, emotion, and the embodied self. *Trends Cogn Sci* 17:565-573.
- 793 Shaw FZ, Lee SY, Chiu TH (2006) Modulation of somatosensory evoked potentials during wake-sleep  
794 states and spike-wave discharges in the rat. *Sleep* 29:285-293.
- 795 Shetake JA, Engineer ND, Vrana WA, Wolf JT, Kilgard MP (2012) Pairing tone trains with vagus nerve  
796 stimulation induces temporal plasticity in auditory cortex. *Exp Neurol* 233:342-349.
- 797 Sjogren MJ, Hellstrom PT, Jonsson MA, Runnerstam M, Silander HC, Ben-Menachem E (2002) Cognition-  
798 enhancing effect of vagus nerve stimulation in patients with Alzheimer's disease: a pilot study. *J*  
799 *Clin Psychiatry* 63:972-980.
- 800 Steriade M (1997) Synchronized activities of coupled oscillators in the cerebral cortex and thalamus at  
801 different levels of vigilance. *Cereb Cortex* 7:583-604.
- 802 Steriade M (2004) Acetylcholine systems and rhythmic activities during the waking--sleep cycle. *Prog*  
803 *Brain Res* 145:179-196.
- 804 Steriade M, Nunez A, Amzica F (1993a) Intracellular analysis of relations between the slow (< 1 Hz)  
805 neocortical oscillation and other sleep rhythms of the electroencephalogram. *J Neurosci*  
806 13:3266-3283.
- 807 Steriade M, Nunez A, Amzica F (1993b) A novel slow (< 1 Hz) oscillation of neocortical neurons in vivo:  
808 depolarizing and hyperpolarizing components. *J Neurosci* 13:3252-3265.
- 809 Trinder J, Kleiman J, Carrington M, Smith S, Breen S, Tan N, Kim Y (2001) Autonomic activity during  
810 human sleep as a function of time and sleep stage. *J Sleep Res* 10:253-264.
- 811 Tsakiris M, Critchley H (2016) Interoception beyond homeostasis: affect, cognition and mental health.  
812 *Philos Trans R Soc Lond B Biol Sci* 371.

813 Upton AR, Tougas G, Talalla A, White A, Hudoba P, Fitzpatrick D, Clarke B, Hunt R (1991)  
814 Neurophysiological effects of left vagal stimulation in man. *Pacing Clin Electrophysiol* 14:70-76.  
815 Vesuna S, Kauvar IV, Richman E, Gore F, Oskotsky T, Sava-Segal C, Luo L, Malenka RC, Henderson JM,  
816 Nuyujukian P, Parvizi J, Deisseroth K (2020) Deep posteromedial cortical rhythm in dissociation.  
817 *Nature* 586:87-94.  
818 Whitehurst LN, Cellini N, McDevitt EA, Duggan KA, Mednick SC (2016) Autonomic activity during sleep  
819 predicts memory consolidation in humans. *Proc Natl Acad Sci U S A* 113:7272-7277.  
820 Zagon A, Kemeny AA (2000) Slow hyperpolarization in cortical neurons: a possible mechanism behind  
821 vagus nerve stimulation therapy for refractory epilepsy? *Epilepsia* 41:1382-1389.  
822 Zanos S (2019) Closed-Loop Neuromodulation in Physiological and Translational Research. *Cold Spring*  
823 *Harb Perspect Med* 9.  
824 Zanos S, Richardson AG, Shupe L, Miles FP, Fetz EE (2011) The Neurochip-2: an autonomous head-fixed  
825 computer for recording and stimulating in freely behaving monkeys. *IEEE Trans Neural Syst*  
826 *Rehabil Eng* 19:427-435.  
827 Zanos S, Moorjani S., Sabesan S., Fetz EE (2016) Effects of vagus nerve stimulation on cortical activity  
828 and excitability in the nonhuman primate. In: SfN Annual Meeting, San Diego CA.  
829 Zoubek L. CS, Lesecq S., Buguet A., Chapotot F. (2007) Feature selection for sleep/wake stages  
830 classification using data driven methods. *Biomedical Signal Processing and Control* 2:171-179.  
831

## 832 Figure legends

833 Figure 1: Epoch based processing of ECoG power for classification of brain states. A) 10 seconds of raw  
834 signal before VNS of one cortical site (on the left). The red vertical line indicates the end of stimulation  
835 (the black vertical lines are the stimulation artifacts). The two vertical dashed lines mark the 6-sec epoch  
836 used to generate the power spectrum density on the right. The blue dashed lines mark the limits of the  
837 frequency bands considered for the power analysis ( $\delta = 1-4$  Hz,  $\theta = 4-8$  Hz,  $\alpha = 8-14$ ,  $\beta = 14-35$  Hz,  $\gamma =$   
838  $35-55$  Hz). B) Example of power values for each frequency band calculated from the epoch displayed in  
839 A. From left to right: absolute power, relative power and transformed relative power. C) Number of  
840 unclassified epochs as a function of different power threshold values used to discriminate between brain  
841 states. The threshold which returned the minimum number of unclassified epochs was chosen for the  
842 classification procedure. D) Example of power distributions in delta and gamma bands generated by all  
843 epochs from one representative cortical site from one recording for three consecutive steps of the power  
844 processing. From left to right: distribution of relative power, transformed relative power and Z-scored

845 transformed relative power (see Methods). The green vertical line in the last subplot points to the  
846 threshold value used to classify the brain states (i.e. minimum value of the curve shown in C).

847 Figure 2: Different brain states using classification strategy based on the power in different frequency  
848 bands were successfully discriminated. Example recording from one representative cortical site from M2.  
849 Color legend: Red: active-wake; blue: resting-wake; green: REM, pink: NREM. A) Two seconds of raw  
850 signal for each classified state. B) Relative power in beta, delta and theta bands of classified epochs  
851 throughout the recording (in black are shown the unclassified epochs). C) Percentage of time per hour  
852 spent in each brain state as a function of time of day. The gray-shaded area indicates the time during  
853 which lights were off.

854 Figure 3: The classified brain states showed a characteristic power spectrum profile with a global trend  
855 across recording sites for both animals (M1, top rows; M2, bottom rows). A) Power spectrum profile of  
856 classified epochs over all cortical channels for each recording (thin traces). Thick traces show the average  
857 across the recordings. B) Classified epochs for each cortical site over two hours of one representative  
858 recording. The gray-shaded area indicates the time during which lights were off. The location of the  
859 recording sites is represented on the right. RPFC: right prefrontal cortical area; RSM: right sensorimotor  
860 cortical area; RPC: right parietal cortical area; RVL: right ventral lateral caudal nucleus (thalamus). Red:  
861 active-wake; blue: resting-wake; green: REM, pink: NREM. Unclassified epochs are represented in white.

862 Figure 4: Vagal evoked potentials (VEPs) elicited during different states for both animals. VEPs were  
863 evoked by trains of 5 pulses at 300 Hz. Some representative recording sites for each animal are shown in  
864 the larger plots on the sides. The colored shadow areas highlight the time range for each VEP component:  
865 early, 5-70ms (gray); intermediate, 70-250ms (orange); late, 250-600ms (light-blue). The detected  
866 components for each brain state are indicated by a colored \*. The X axis represents the time after the first  
867 pulse in the train. The colored traces represent different brain states: red, active-wake; blue, resting-wake;  
868 green, REM; pink, NREM.

869 Figure 5: Vagal evoked potentials (VEPs) elicited during different states recorded from three  
870 representative sites of three different cortical areas (from left to right: prefrontal, sensorimotor, parietal)  
871 of animal M2. Colored lines show VEPs evoked by trains of 5 pulses at different pulse frequencies. VNS  
872 pulse times are shown below. AW: active-wake; RW: resting-wake; REM: rapid eye movement sleep;  
873 NREM: non-rapid eye movement sleep.

874 Figure 6: Modulation of VEP components by brain state and stimulation frequency for both animals (M1,  
875 M2). Each group of bars represents the averaged absolute value of the maximum deflection of the VEP  
876 component over all channels (mean  $\pm$  SE) evoked by trains of 5 pulses delivered at different stimulation  
877 frequencies (color coded) as function of brain state (X axis). Each VEP component (from top to bottom:  
878 early, intermediate, and late) was defined in a specific time window from the first pulse of the stimulation  
879 train (5-70ms, 70-250ms and 250-600ms, respectively). Both animals returned significant differences in  
880 VEP peak amplitudes between brain states for both intermediate and late component (n-way ANOVA:  
881 Intermediate,  $p < 0.001$ ; Late,  $p < 0.001$ ). The early component showed no significant difference (n-way  
882 ANOVA: Early M1,  $p = 0.766$ ; Early M2,  $p = 0.848$ ). All three components showed significant  
883 differences across stimulation frequencies (n-way ANOVA,  $p < 0.001$ ).

884 Figure 7: Brain state modulation of VEPs responses and VEPs variability for each cortical area for both  
885 animals (M1, M2). PF: prefrontal (blue); SM: sensorimotor (pink); PC: parietal cortical area (green); VL:  
886 ventral lateral caudal nucleus (yellow). VEPs in these plots were evoked by VNS trains at a pulse  
887 frequency of 300 Hz. A) Classified VEP magnitude (grand mean  $\pm$  grand SE) for each component. B)  
888 Classified VEP latency (grand mean  $\pm$  grand SE) for each component. C) Inner product (IP) between each  
889 classified single VEP sweep and the corresponding averaged VEP calculated between 5msec and  
890 600msec from stimulation offset (grand mean  $\pm$  grand SE over all channels for different cortical areas).  
891 D) Scatter plot with the least-squares regression line for each animal representing the amplitude of the  
892 maximum deflection versus the peak-to-trough magnitude for all three components elicited by all tested  
893 VNS protocols. R is the correlation coefficient ( $p < 0.01$  for both animals).

894 Figure 8: Classified VEPs evoked by 5 pulses VNS train at 5Hz in both animals (M1, M2). A) Example  
895 of classified VEPs for three different channels. The colored traces represent different brain states: red,  
896 active-wake; blue, resting-wake; green, REM; pink, NREM. B) Quantification of the classified VEPs as  
897 average over all channels (mean  $\pm$  SE) of the responses' root-mean square (rms) calculated between 10ms  
898 and 1200ms from stimulation onset. The inset on top shows a graphic representation of the rms  
899 measurement indicated by the pink area under the black curve.

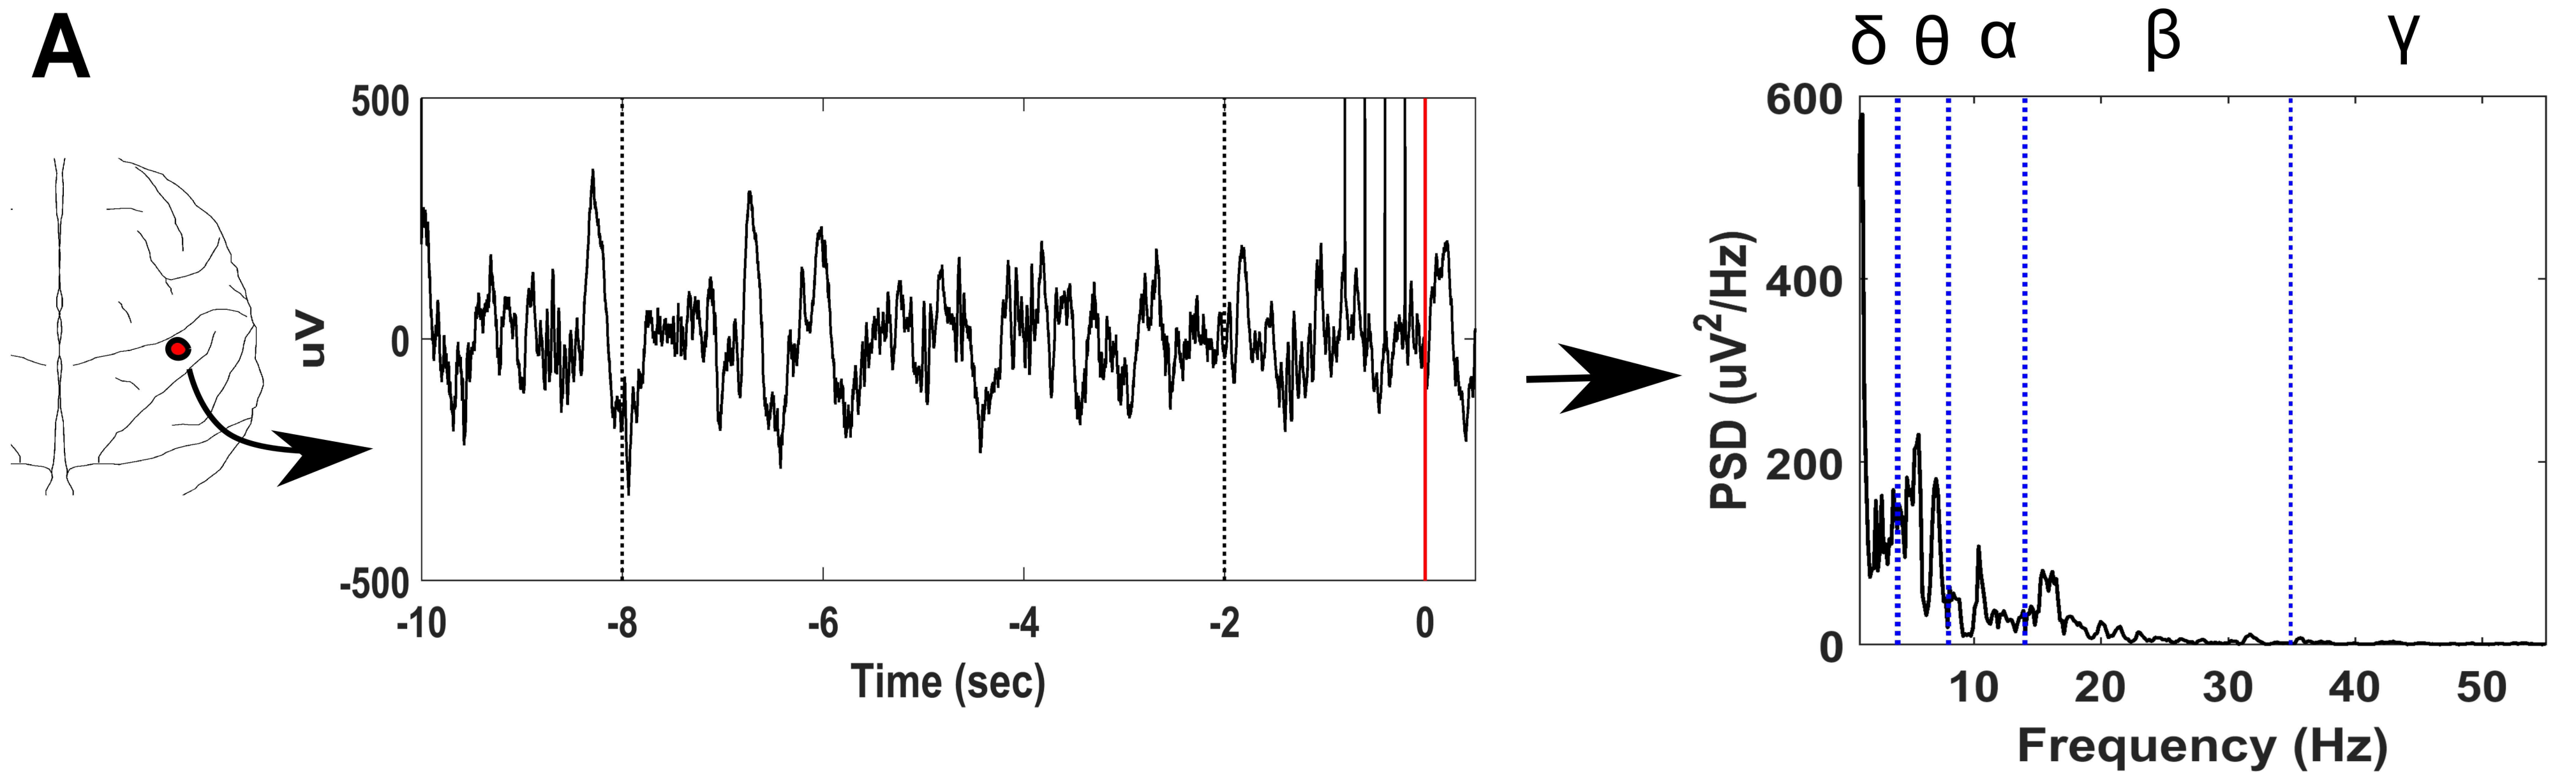

bioRxiv preprint doi: <https://doi.org/10.1101/2021.01.11.426280>; this version posted January 12, 2021. The copyright holder for this preprint (which was not certified by peer review) is the author/funder, who has granted bioRxiv a license to display the preprint in perpetuity. It is made available under aCC-BY-ND 4.0 International license.

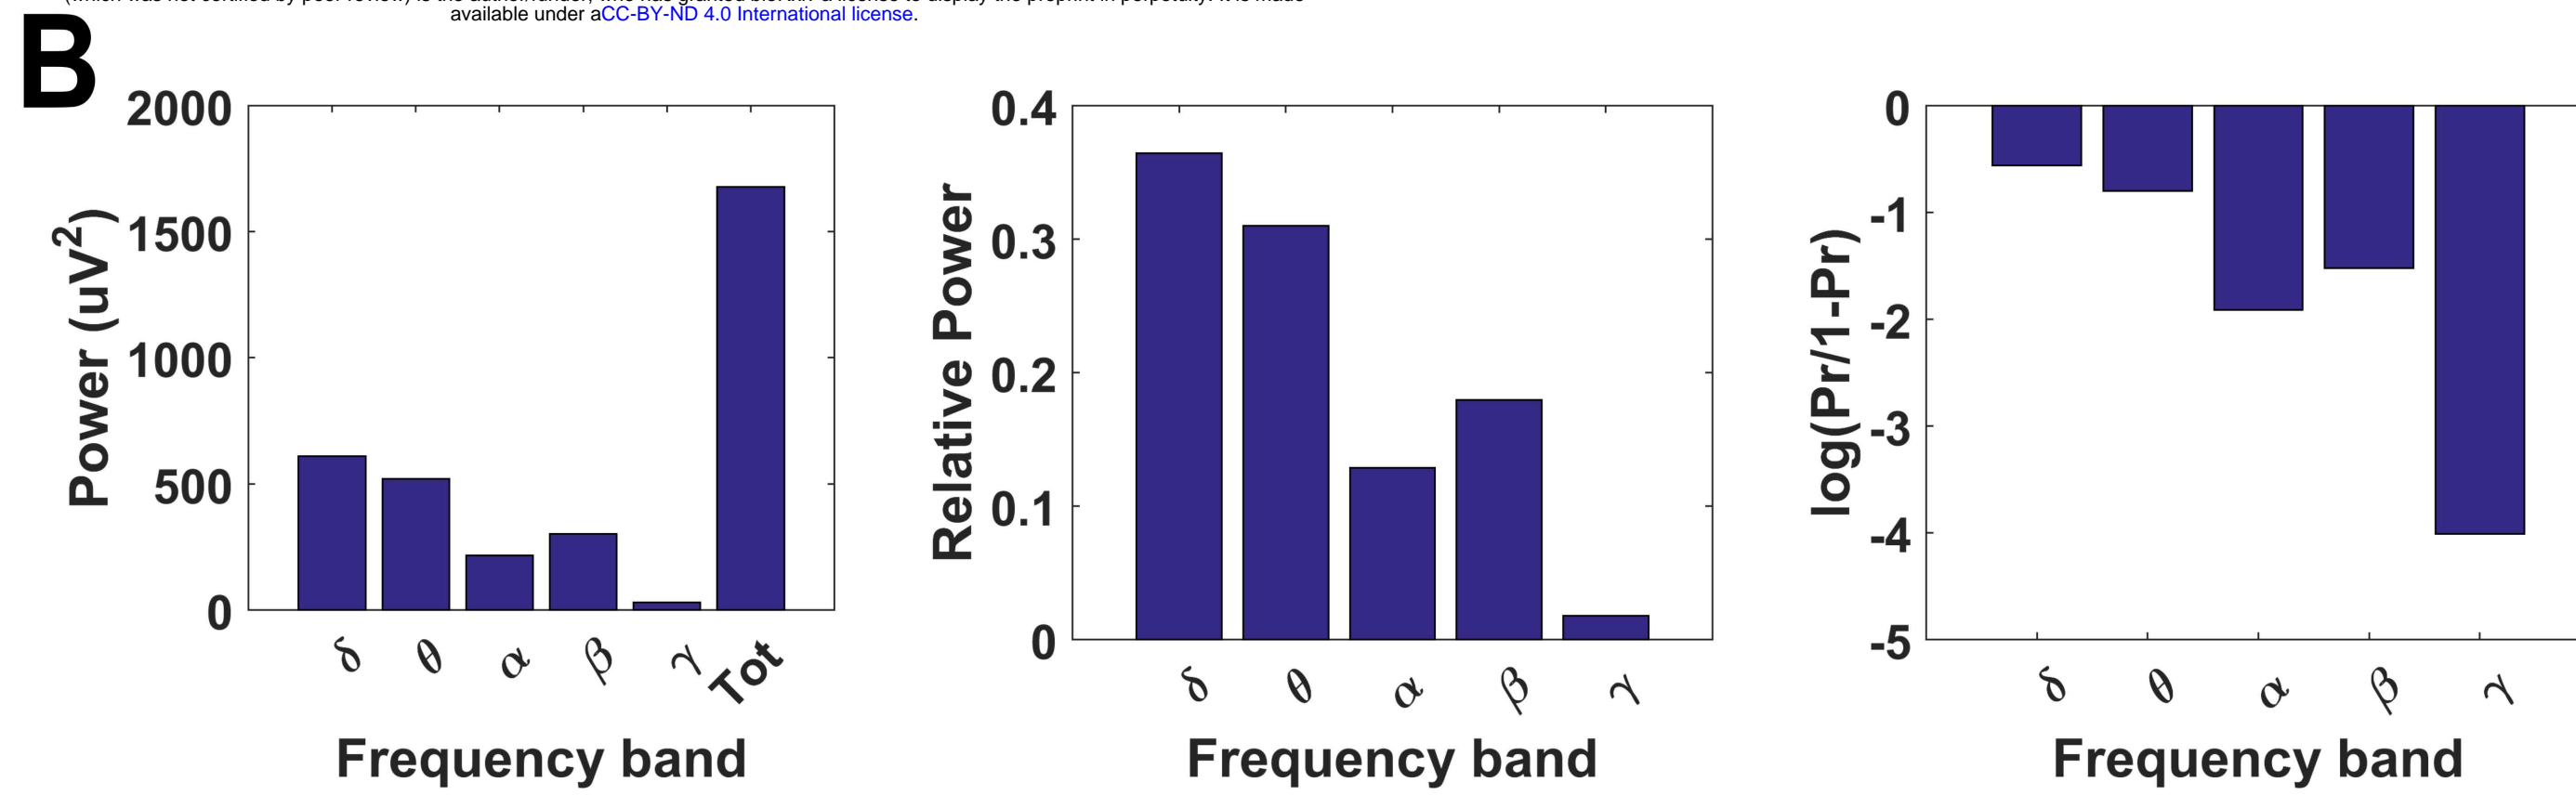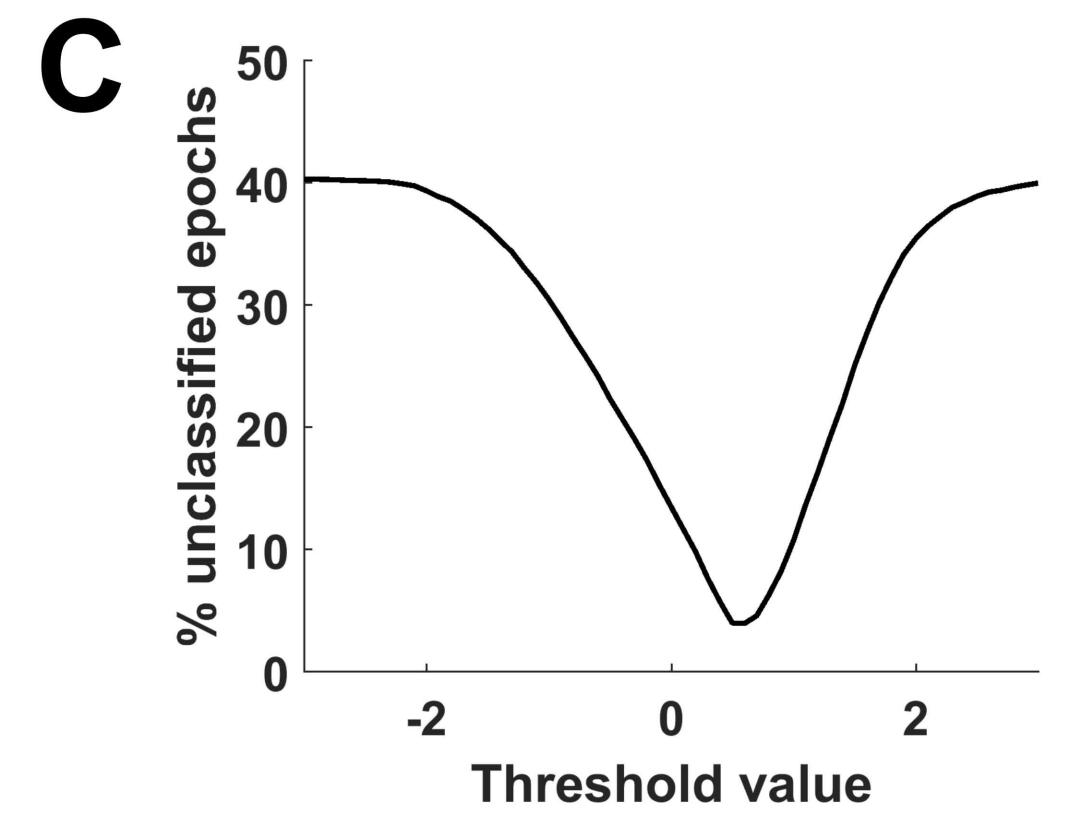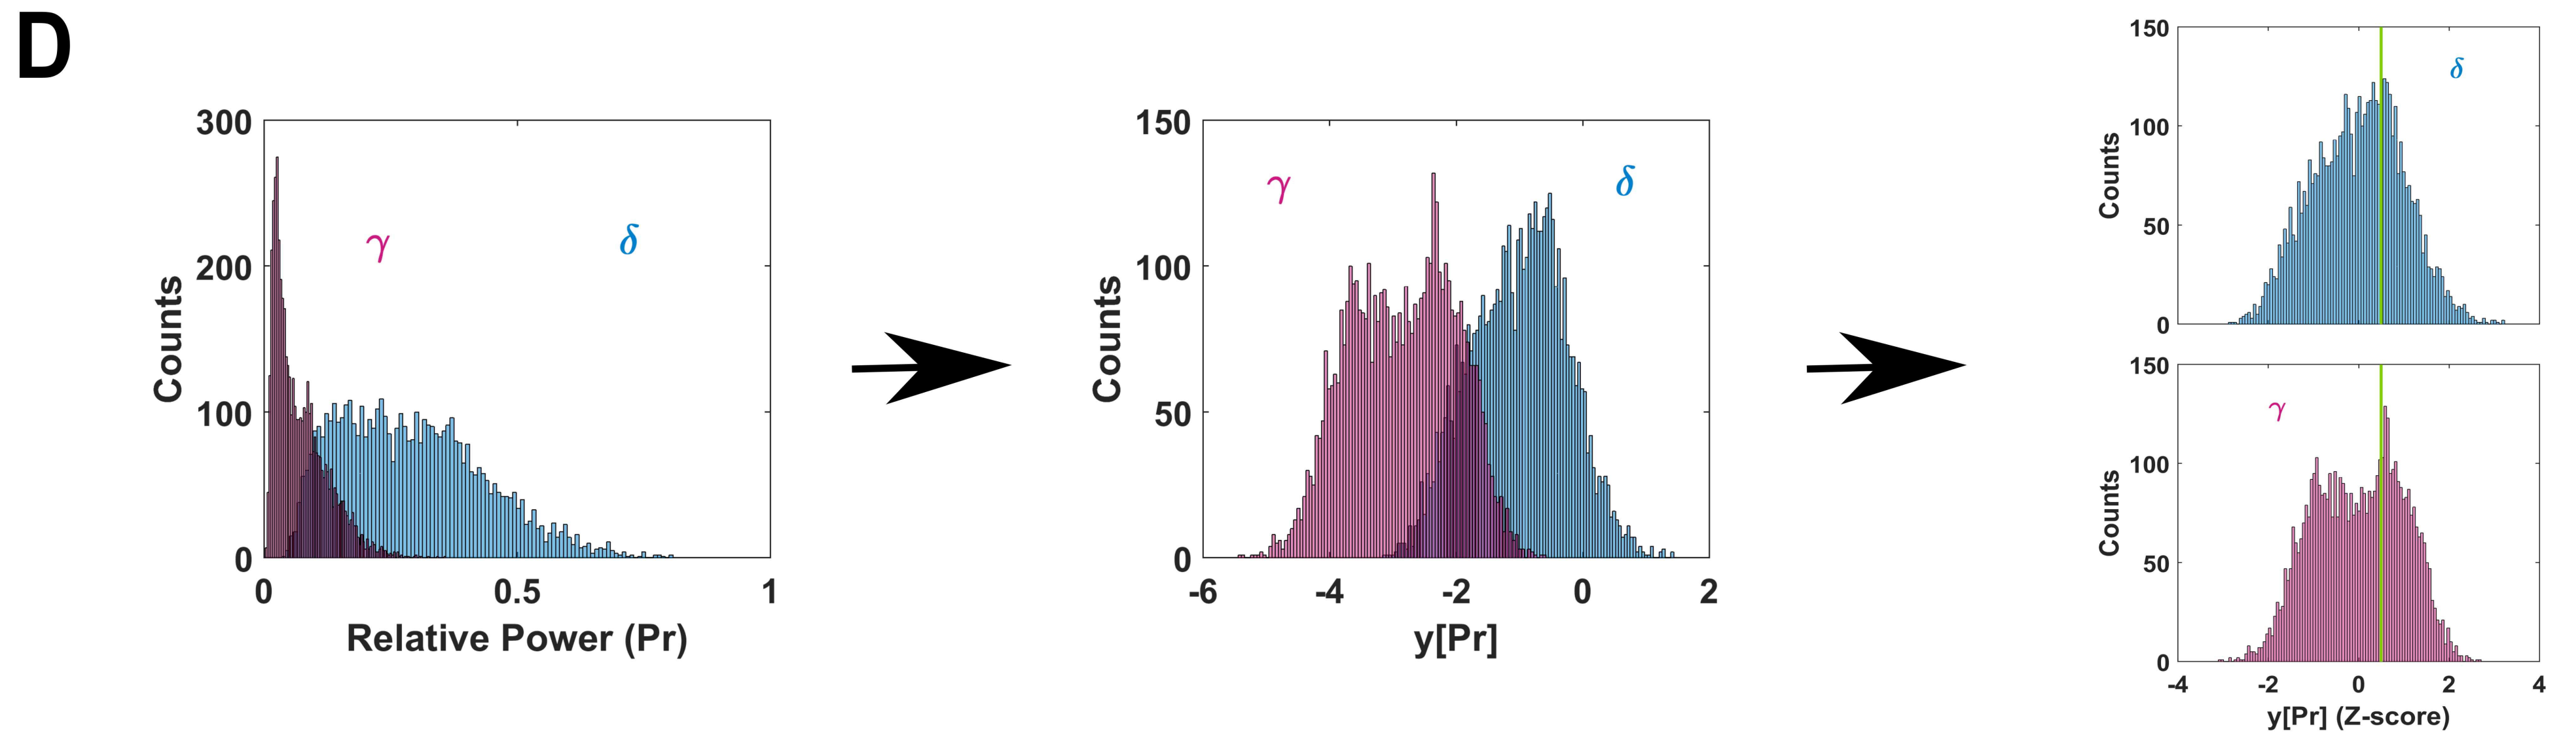



**A**

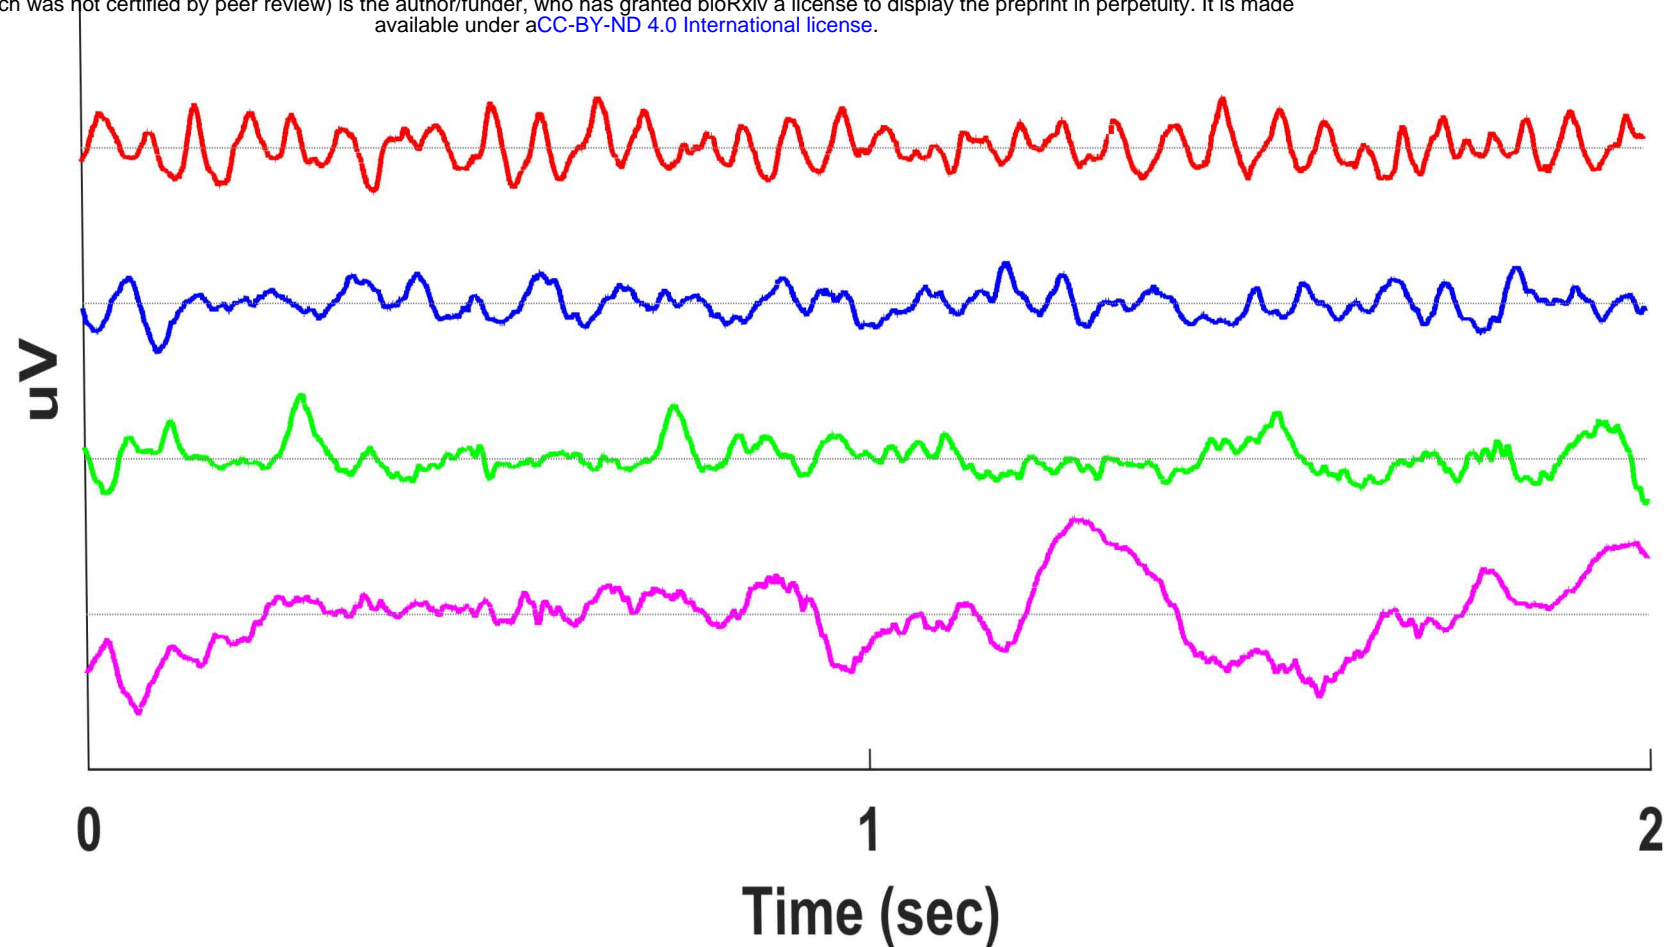

**B**

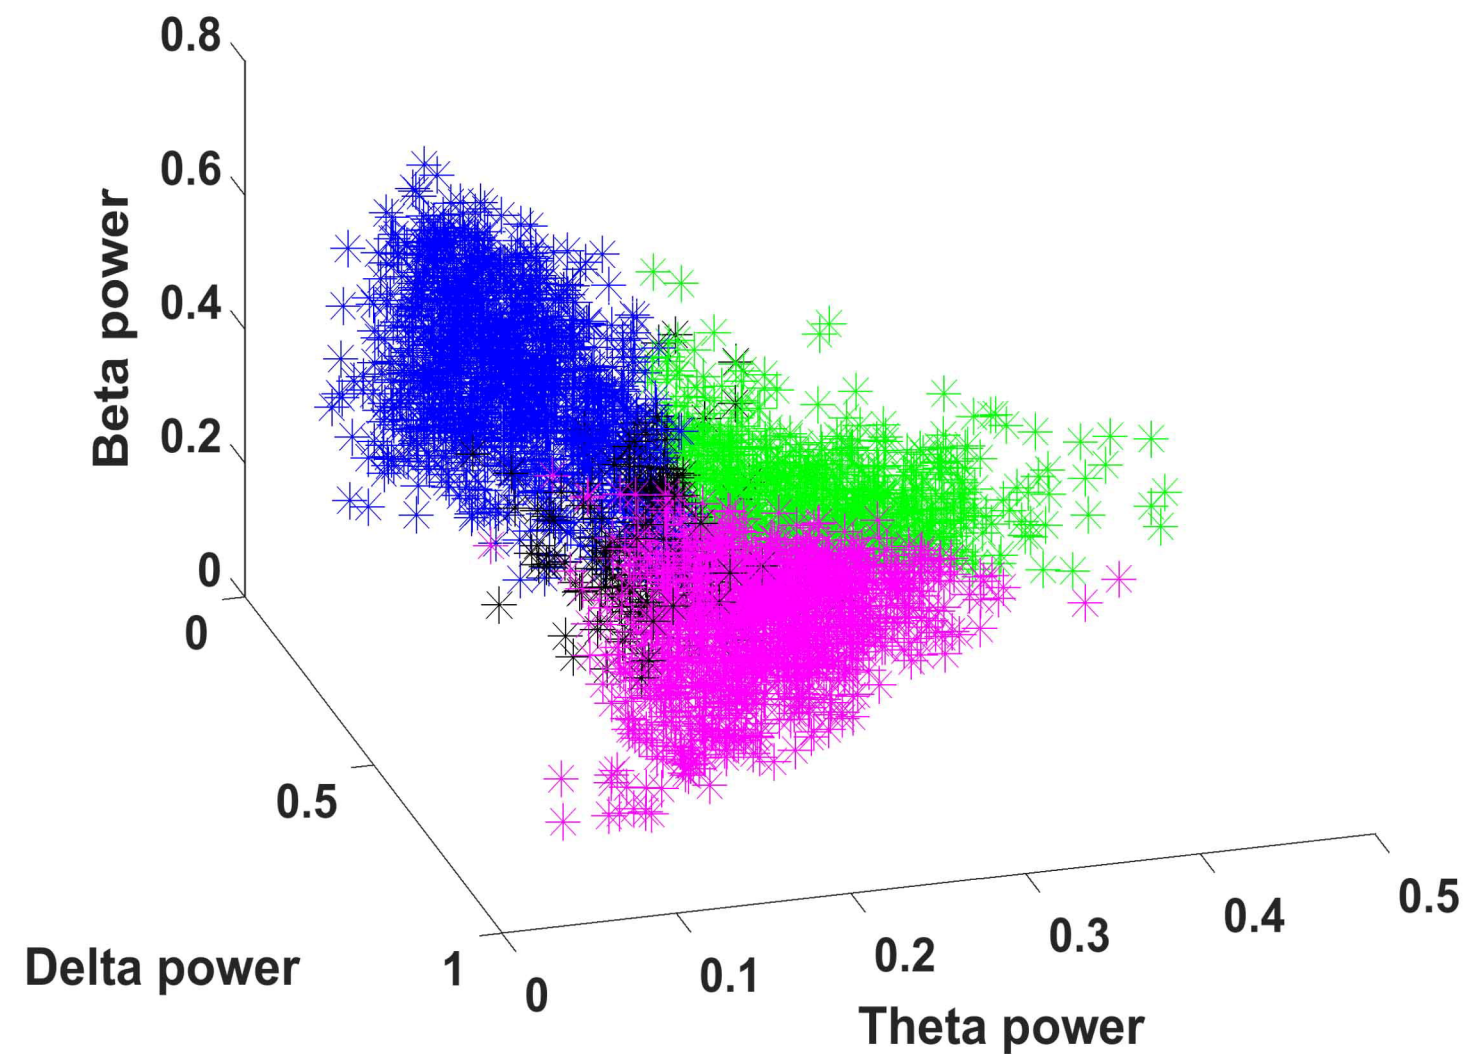

**C**

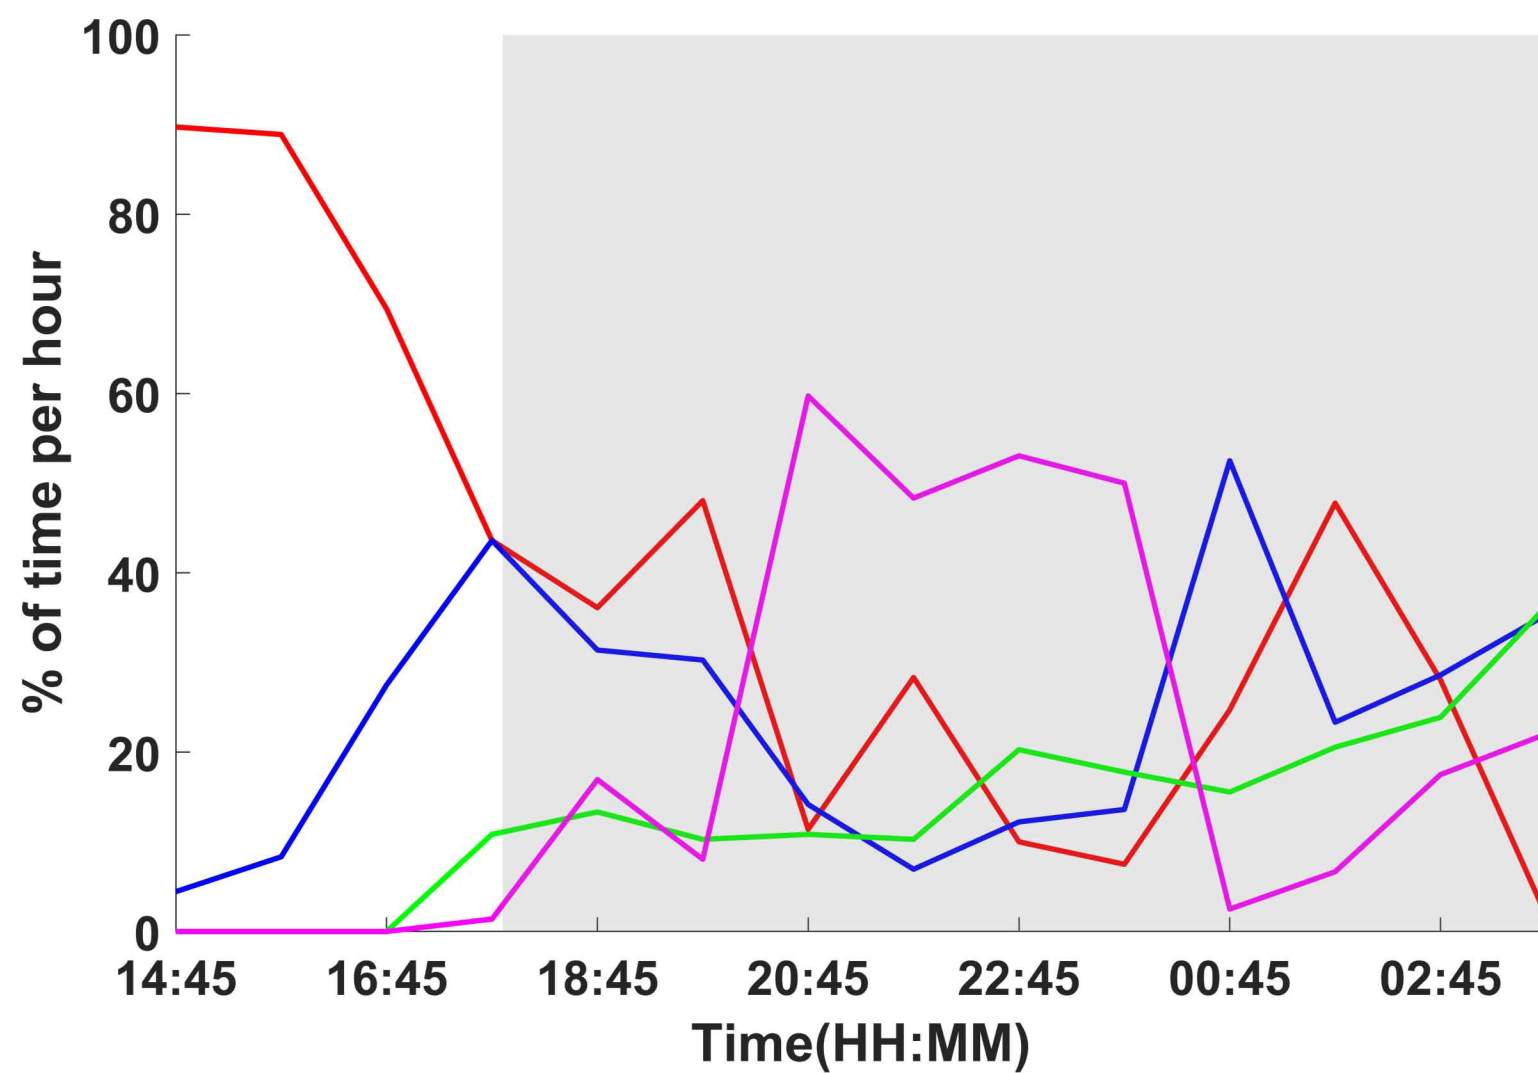

- Active Wake**
- Resting Wake**
- REM sleep**
- NREM sleep**



**A**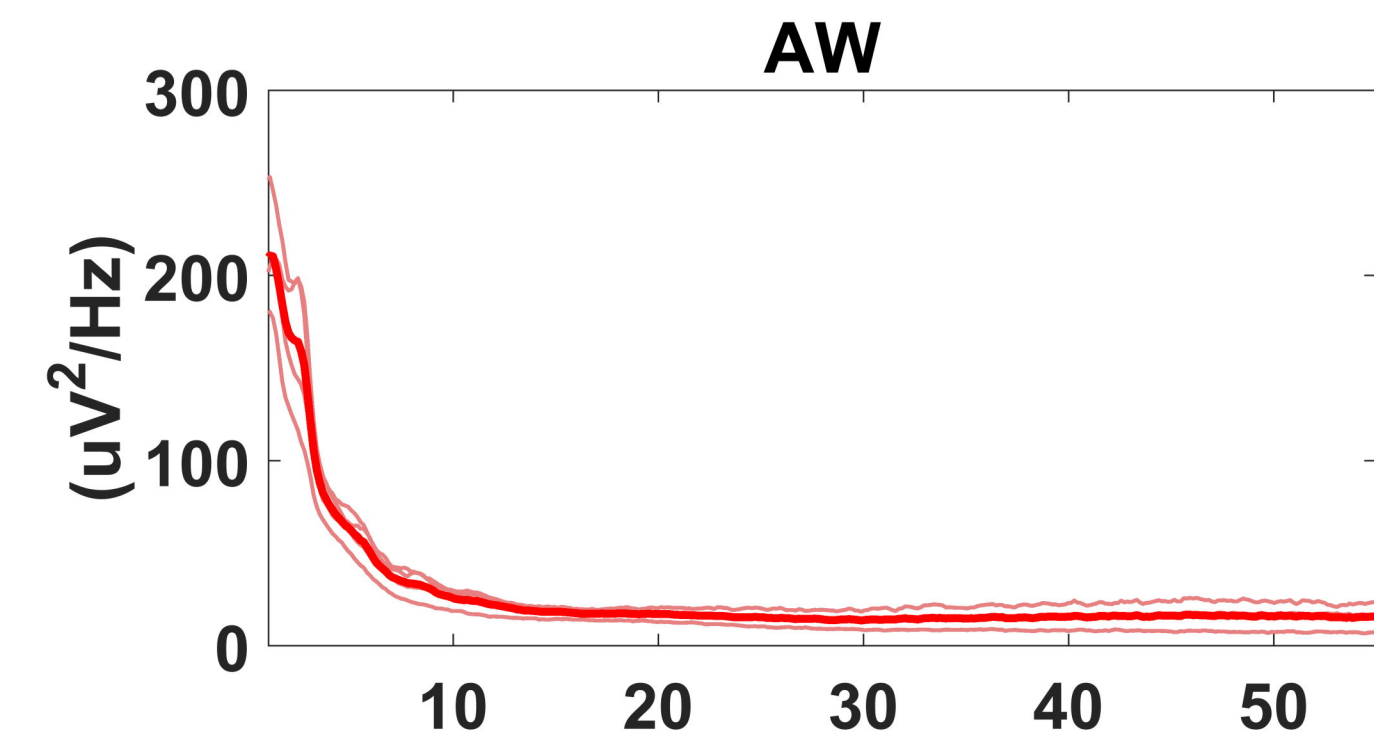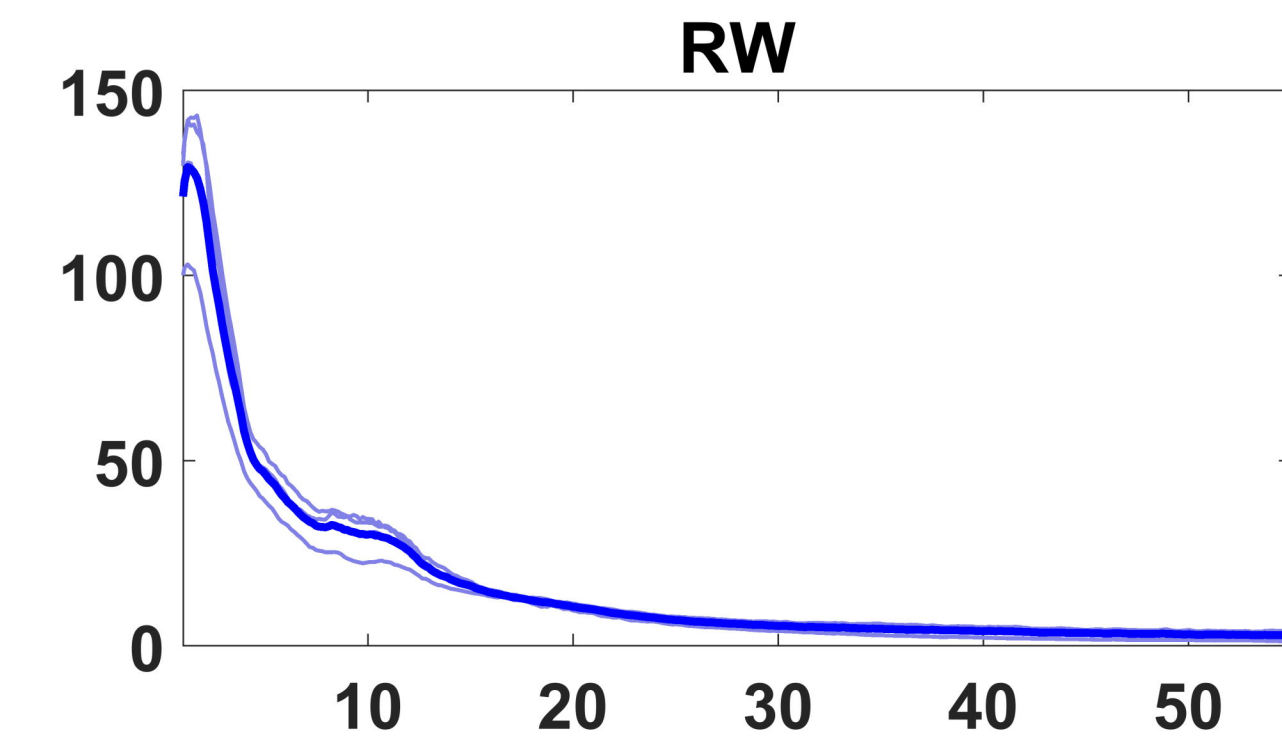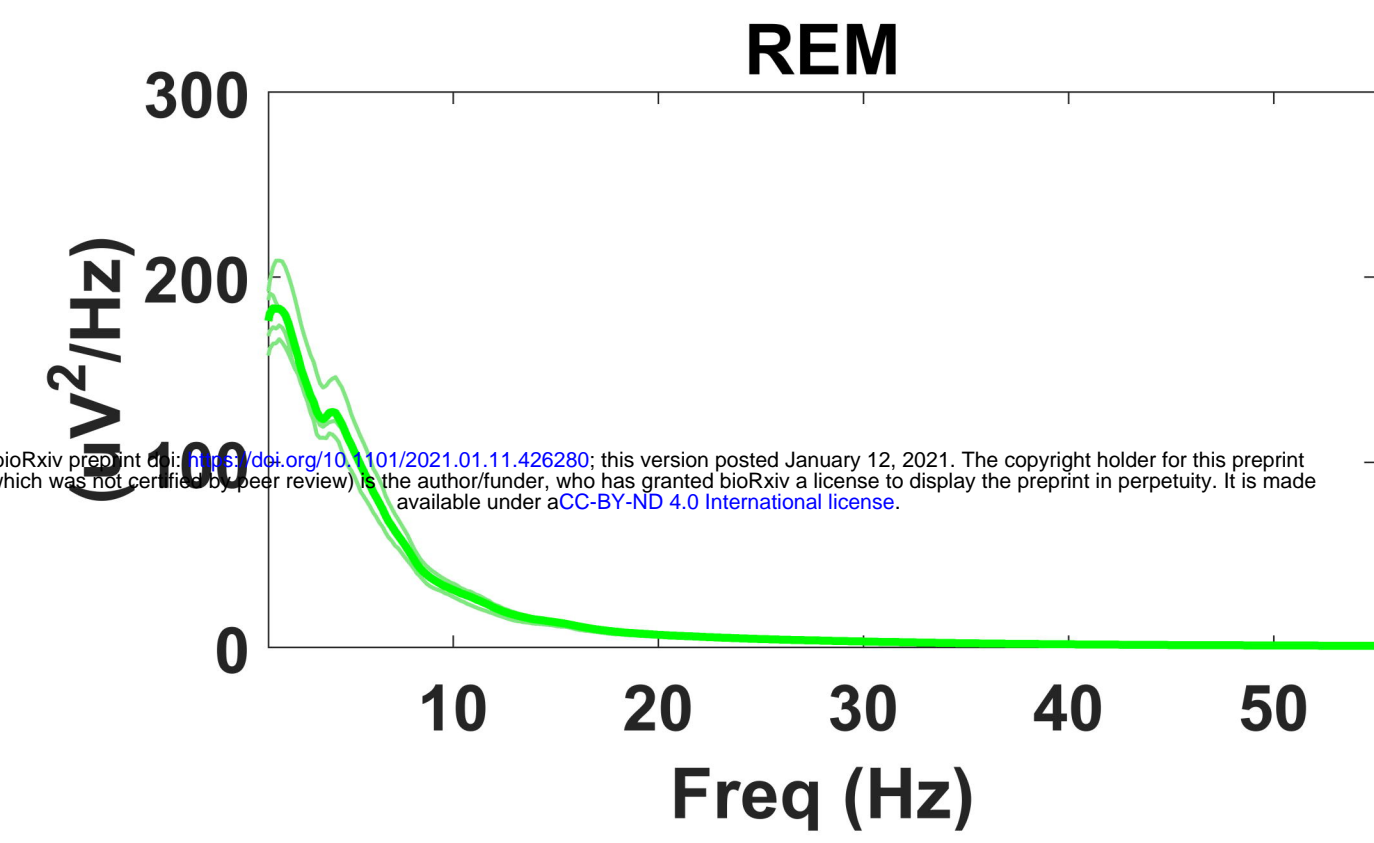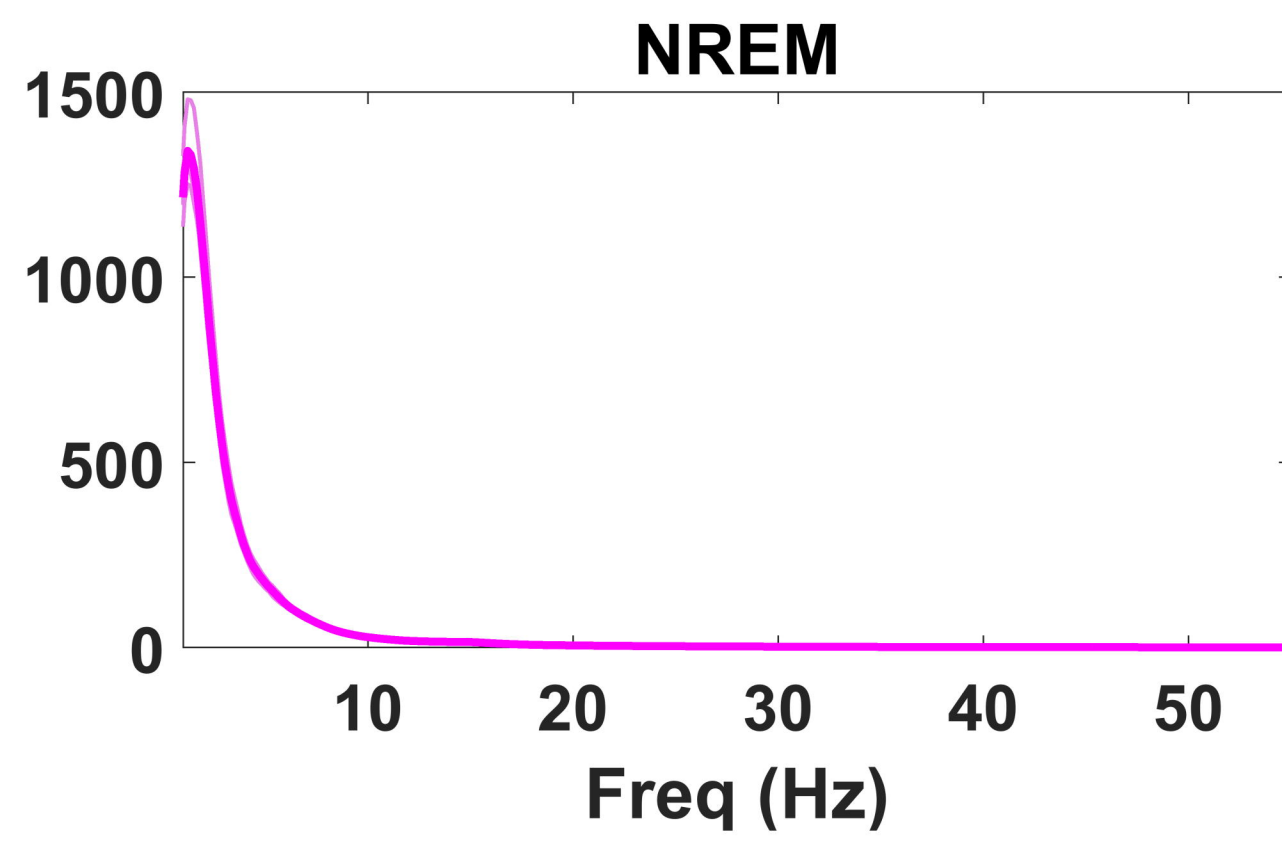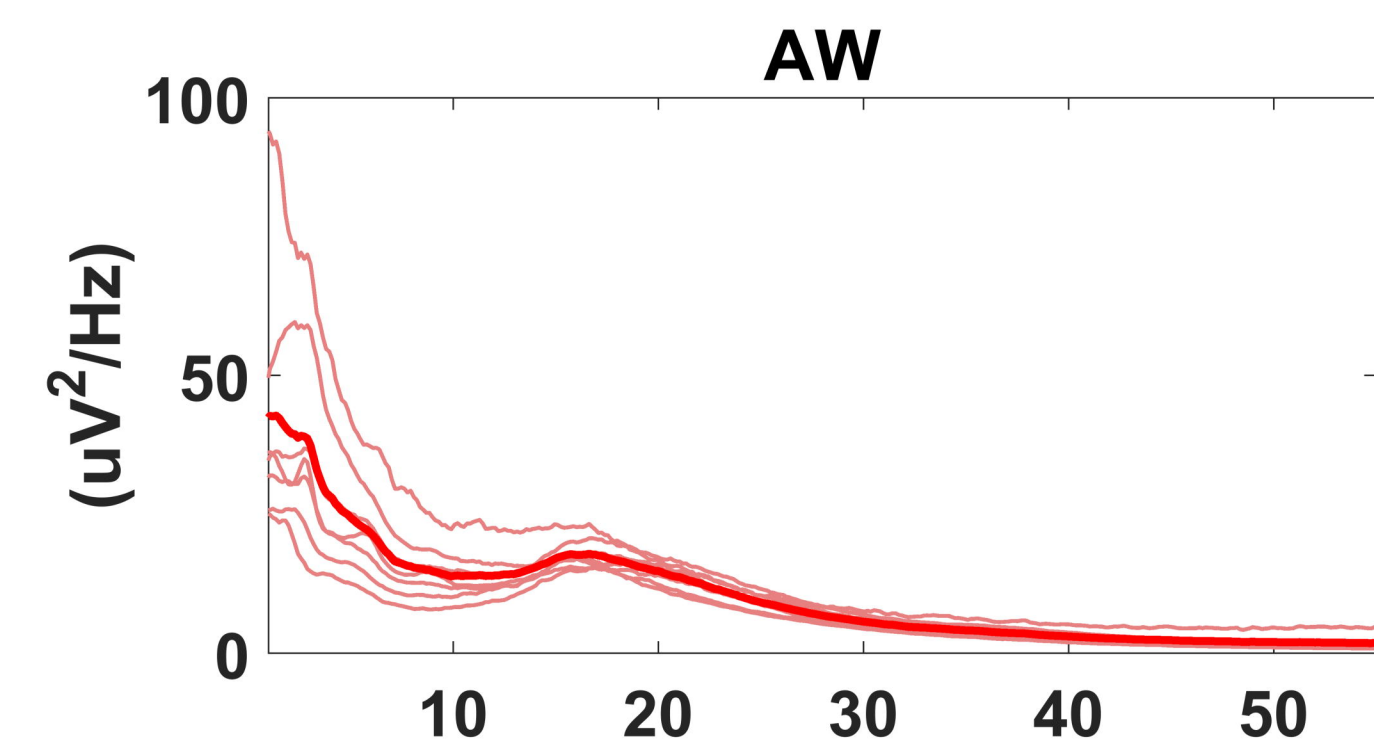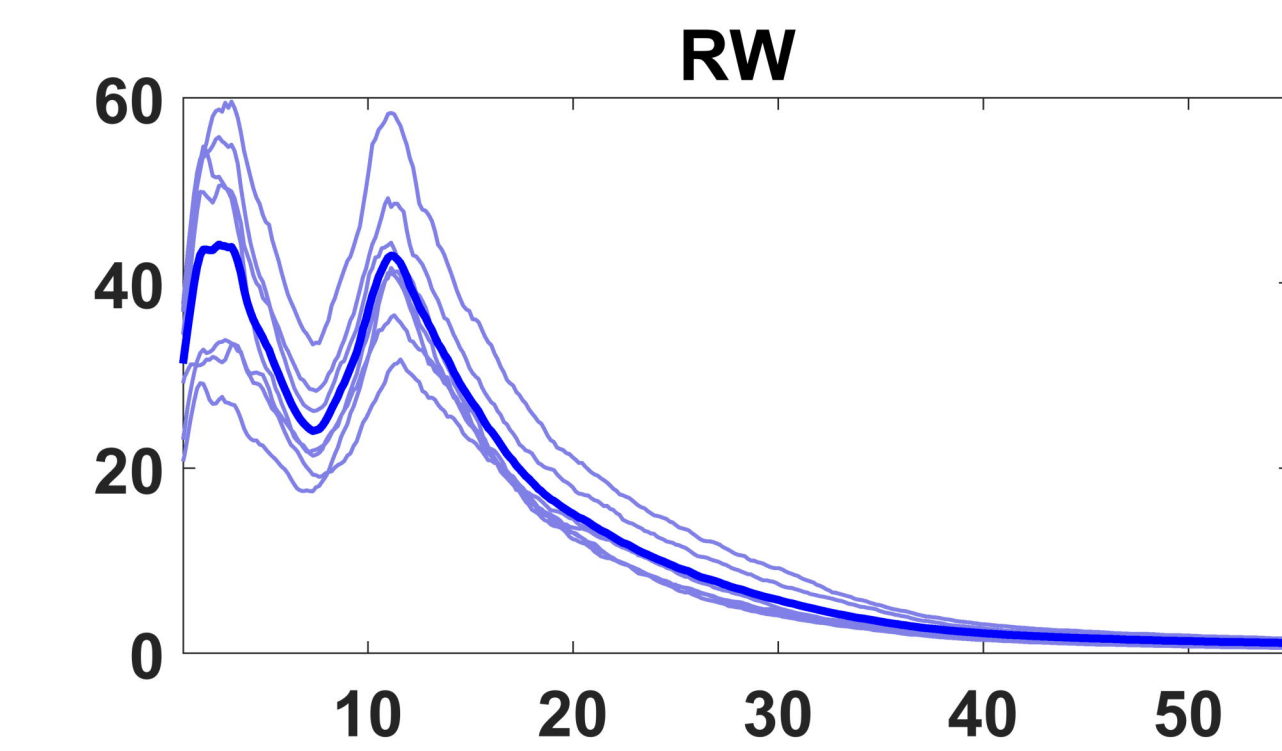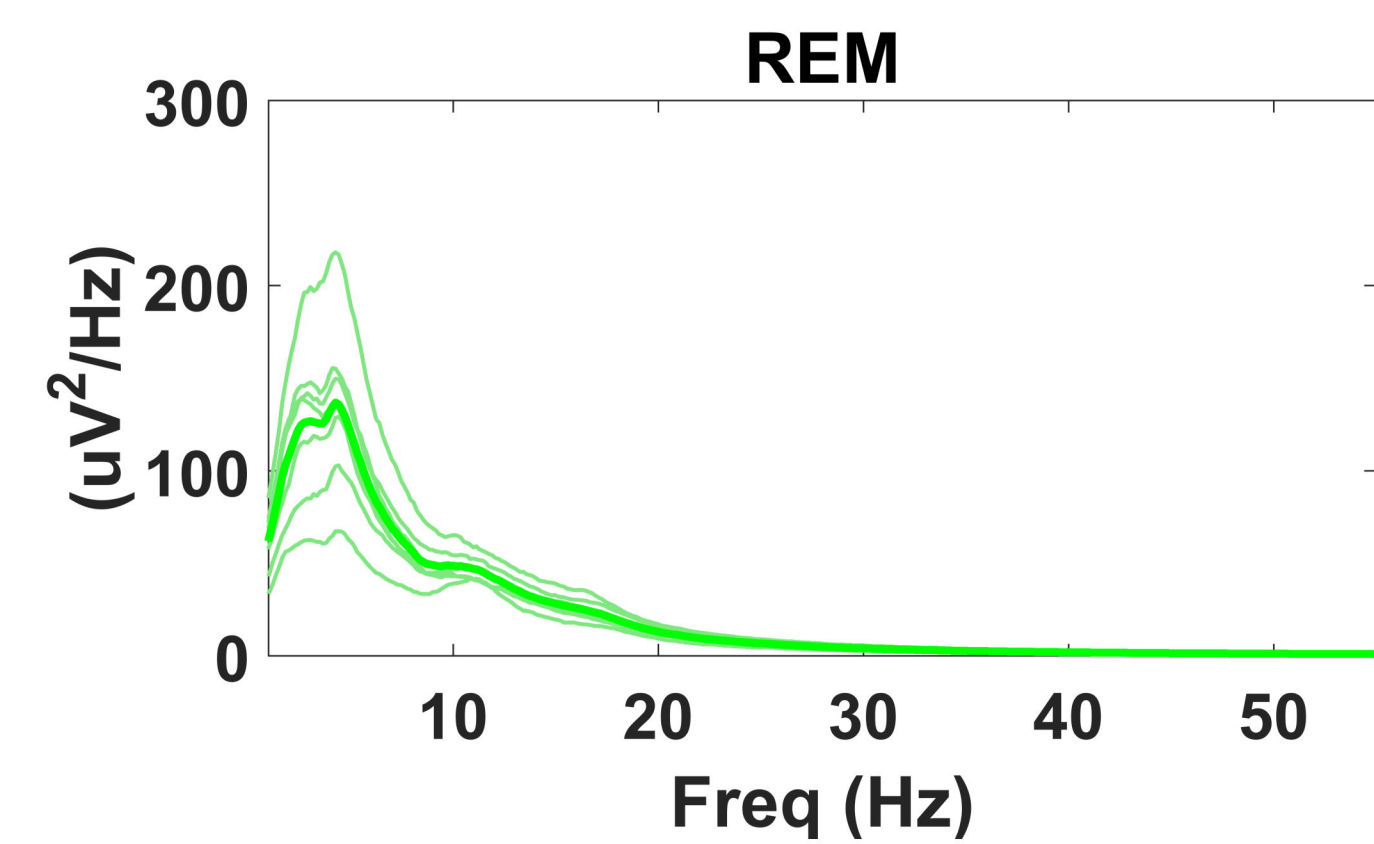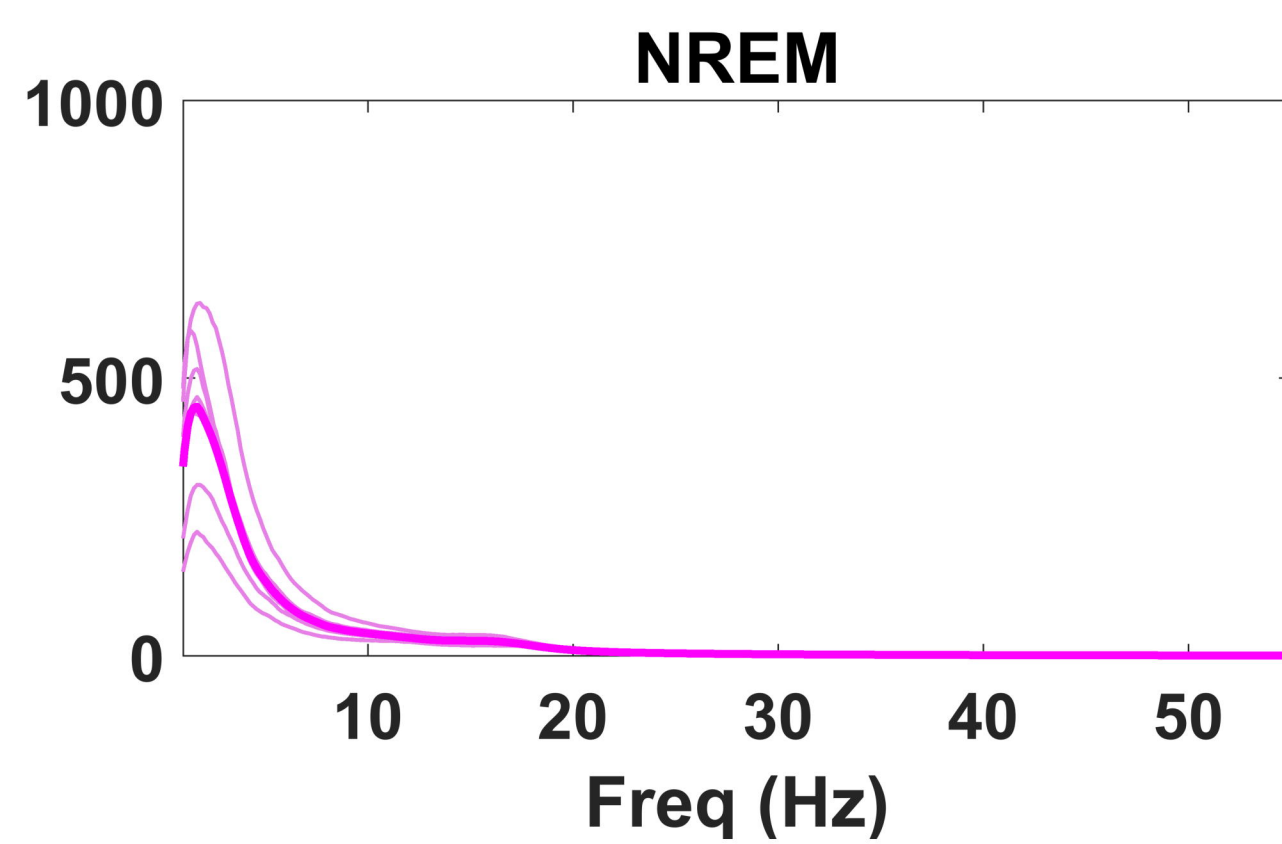**B**

RPFC1  
RPFC2  
RPFC3  
RPFC4  
RPFC5  
RPFC6  
RSM1  
RSM2  
RSM3  
RSM4  
RSM5  
RPC1  
RPC2  
RPC3  
RPC4  
RVL1

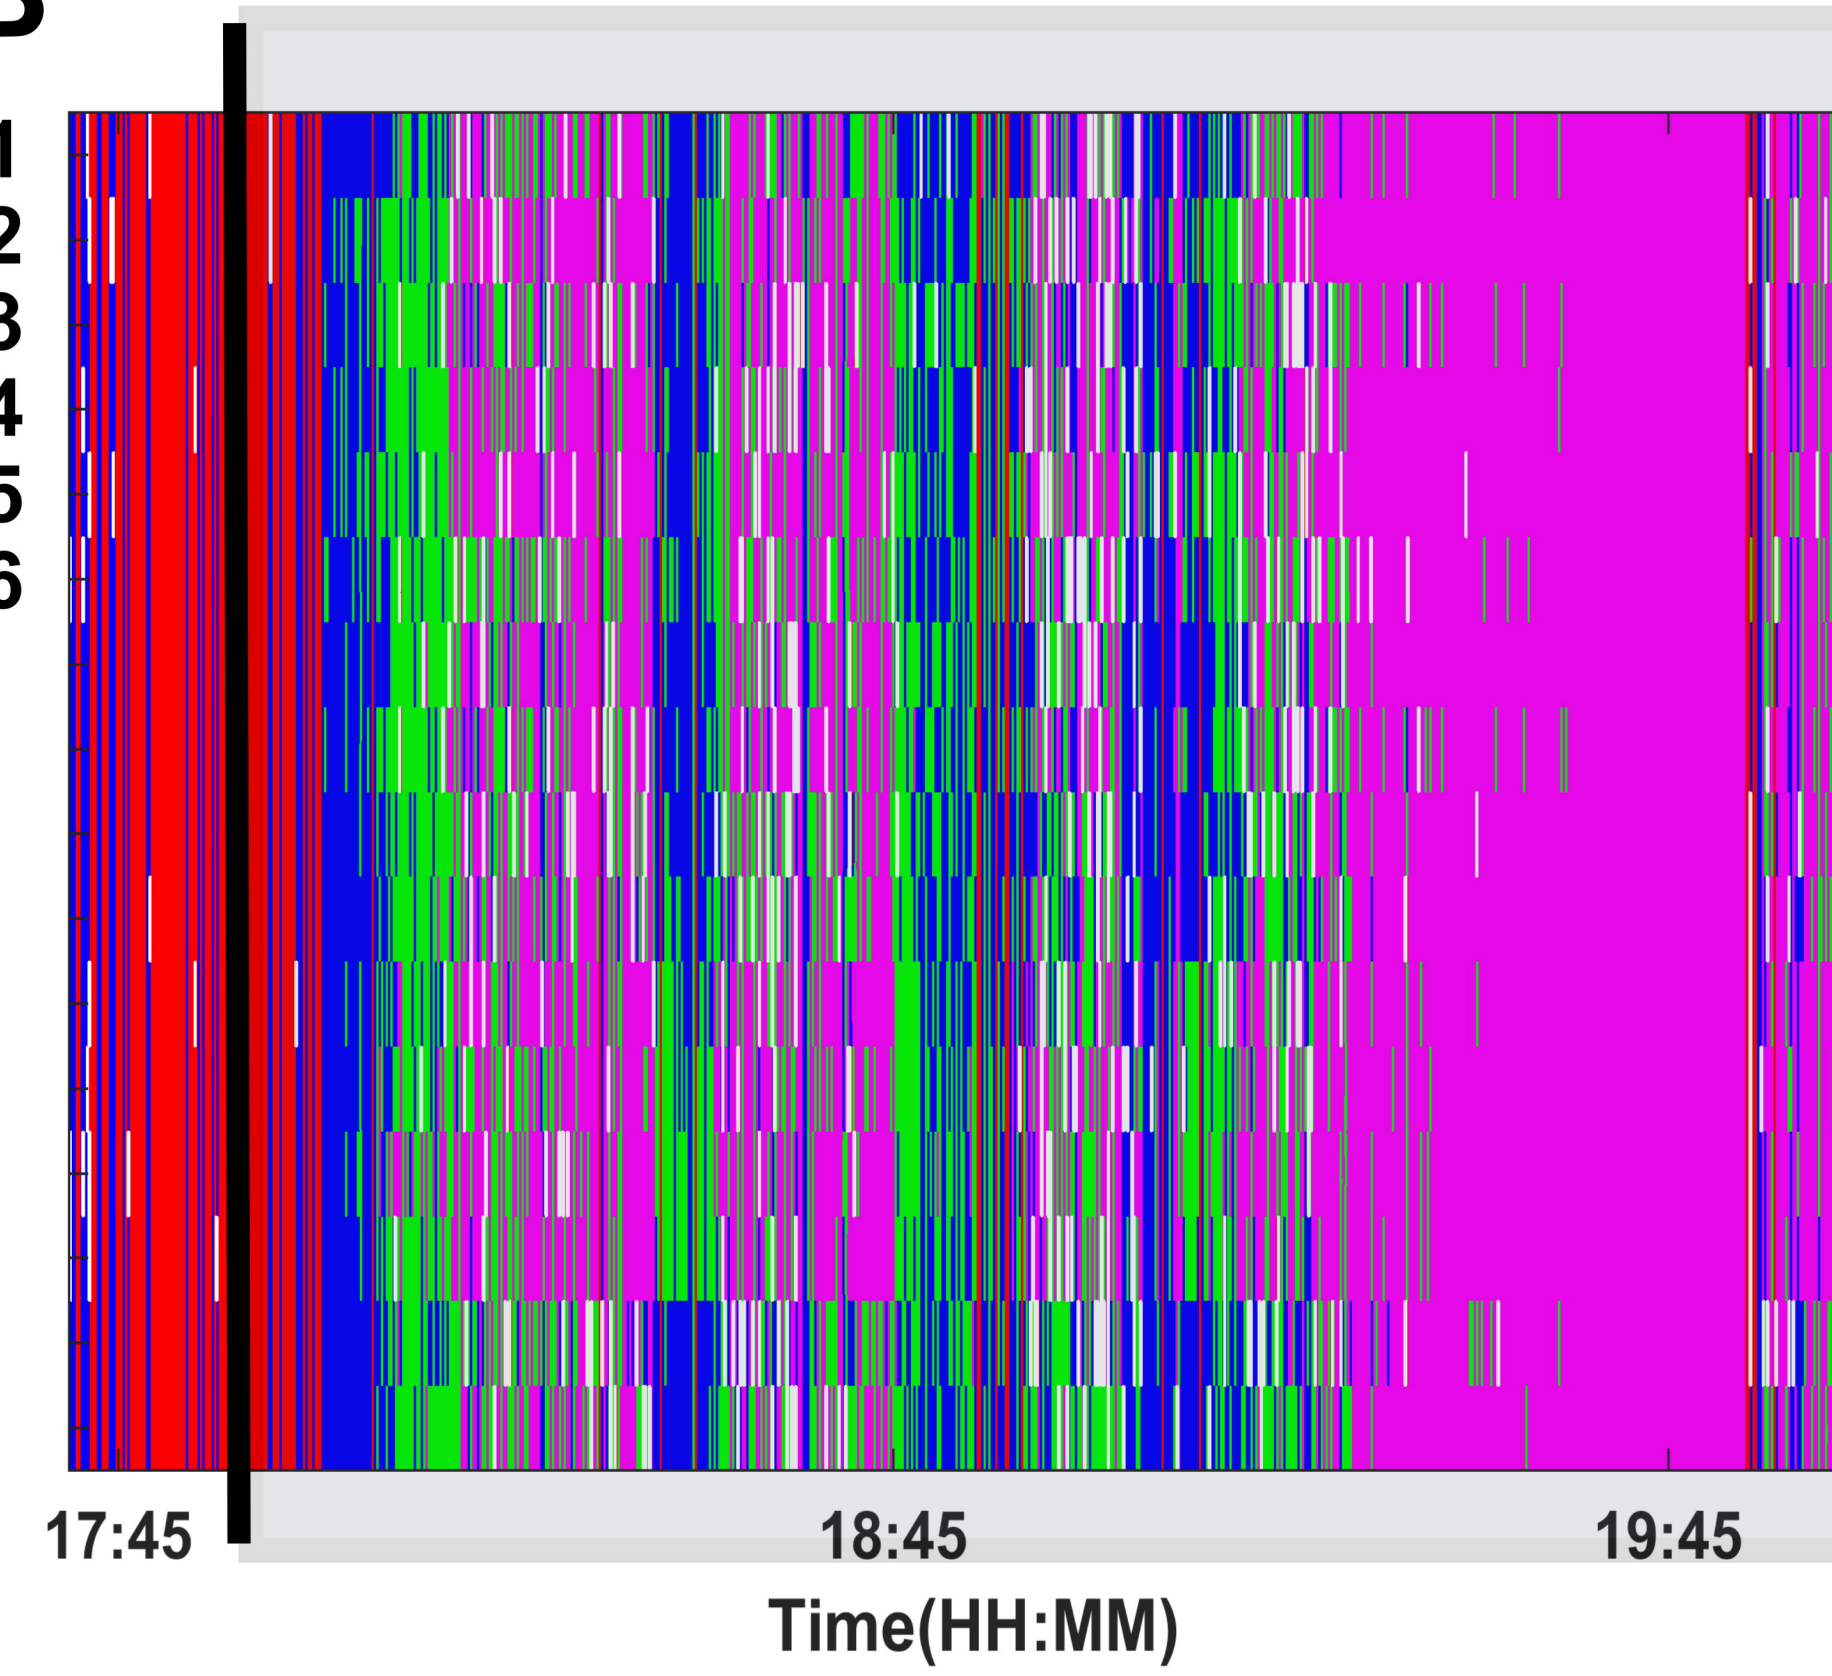

RSM1  
RSM2  
RSM3  
RSM4  
RSM5  
RPC1  
RPC2  
RPC3  
RPC4

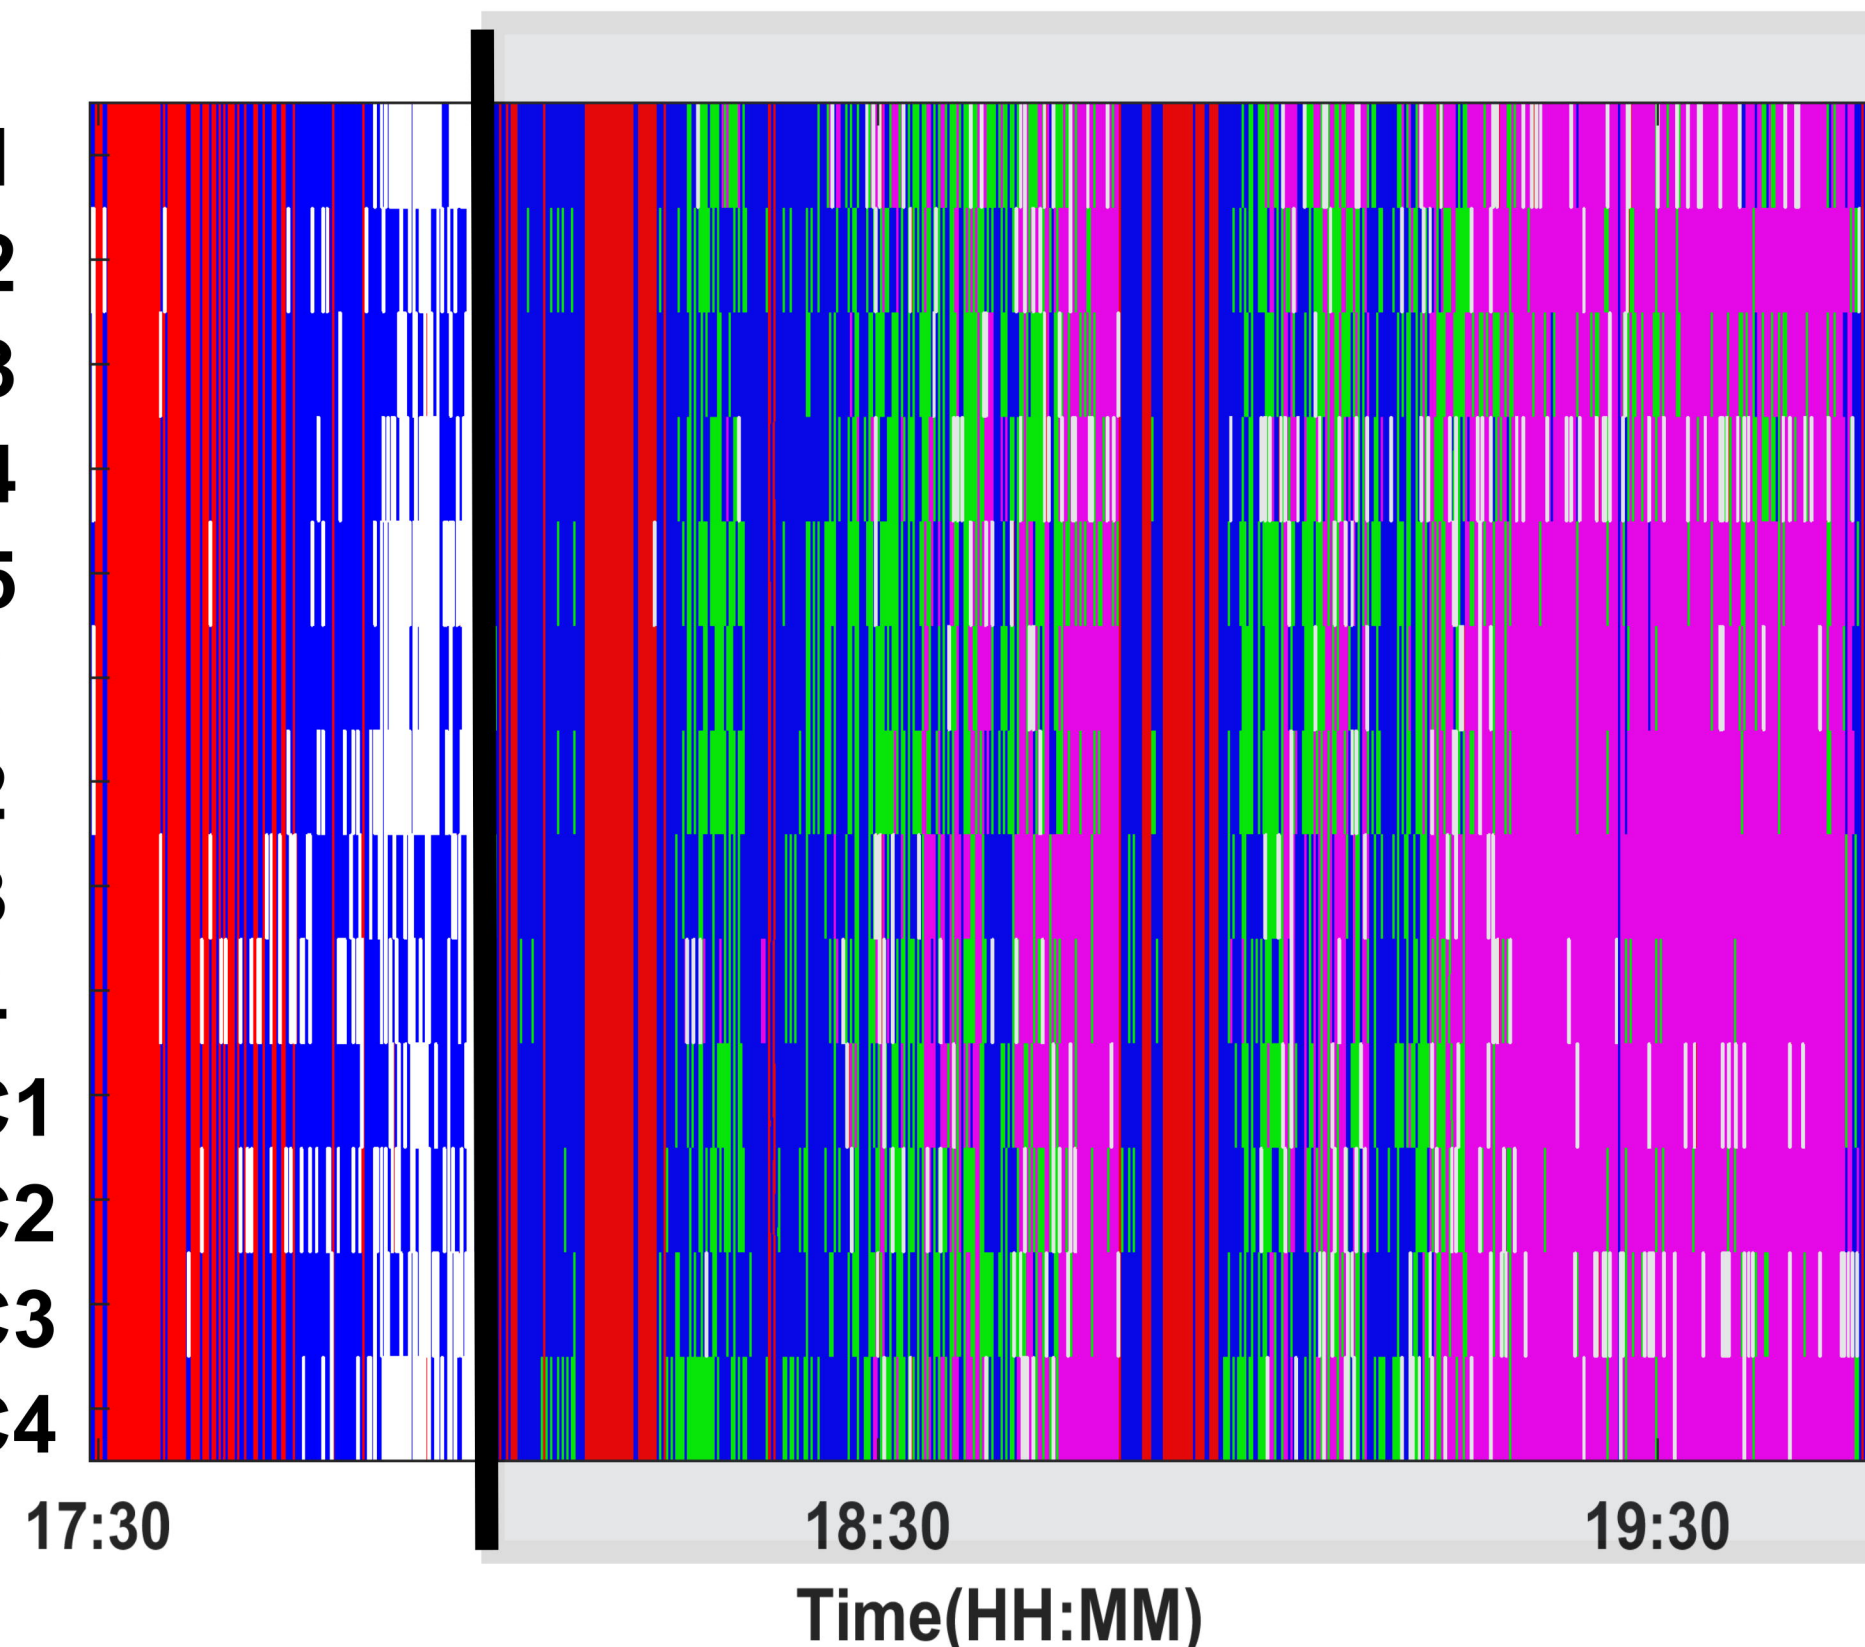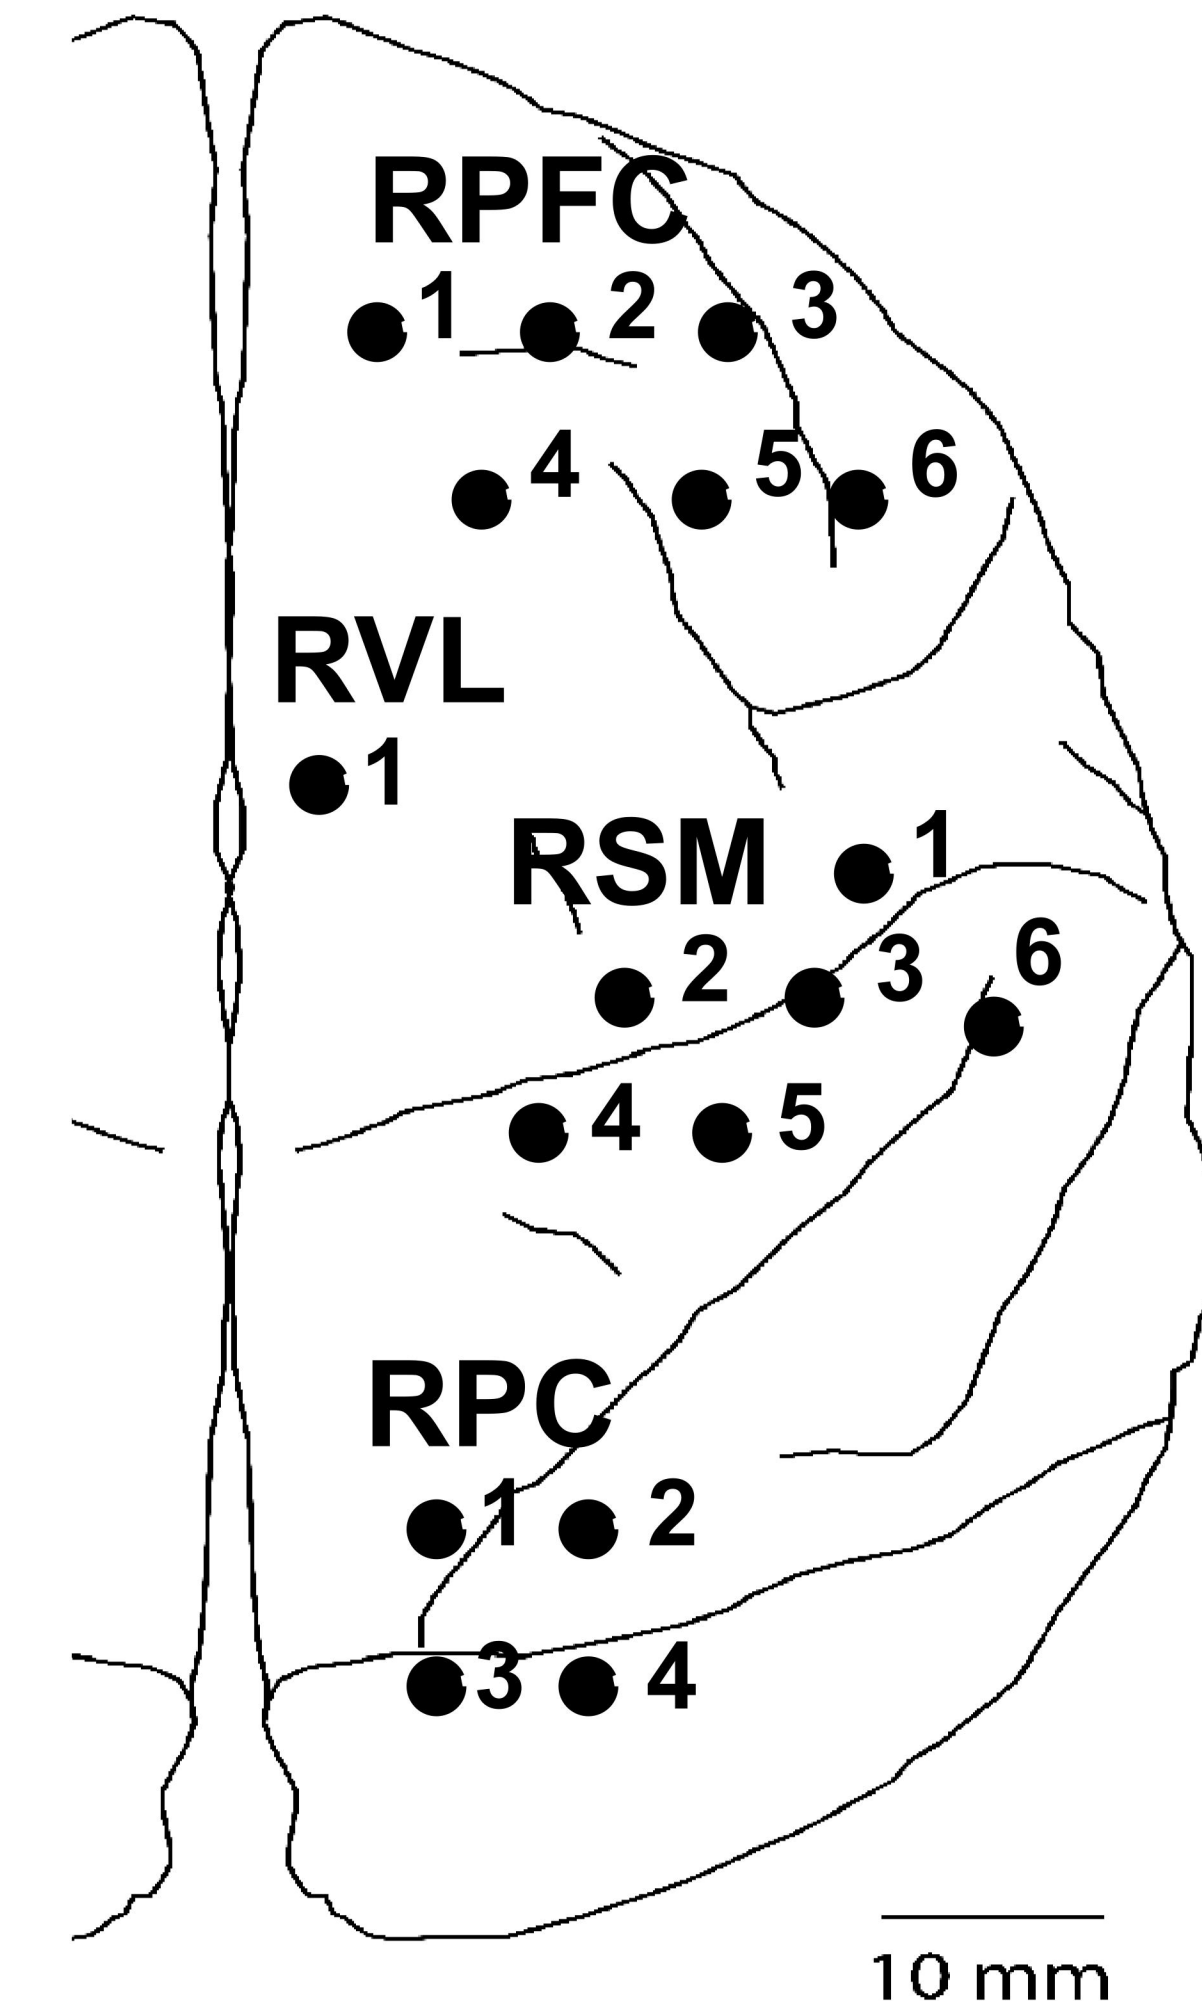

Active Wake  
Resting Wake  
REM sleep  
NREM sleep



**RPFC2**

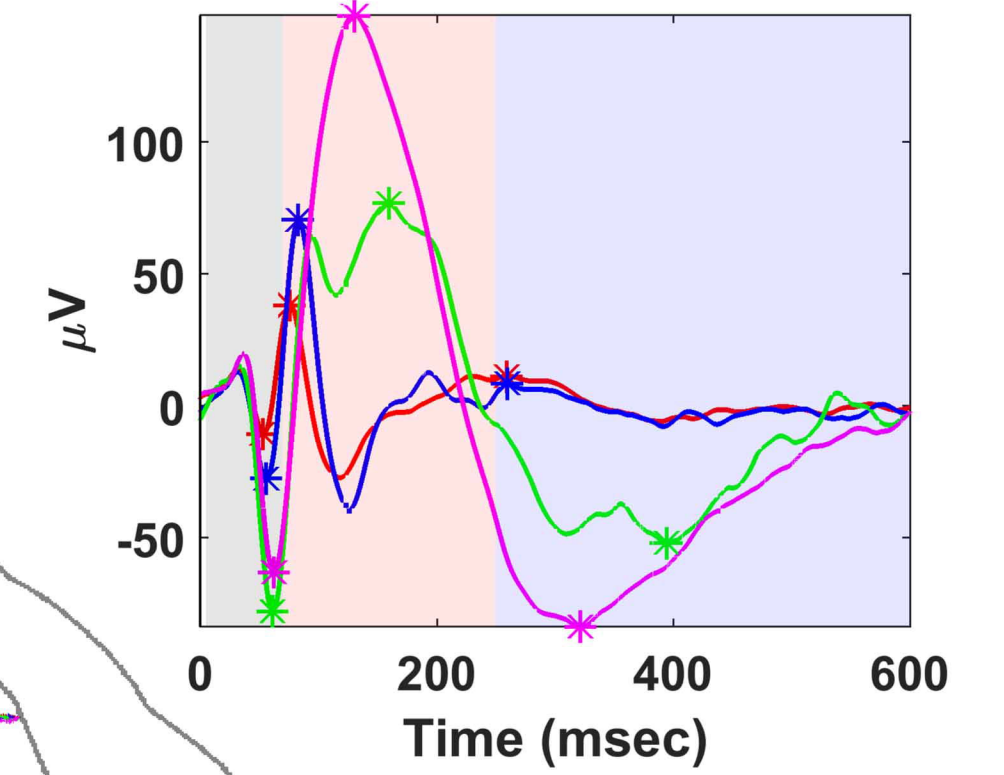

**RPFC2**

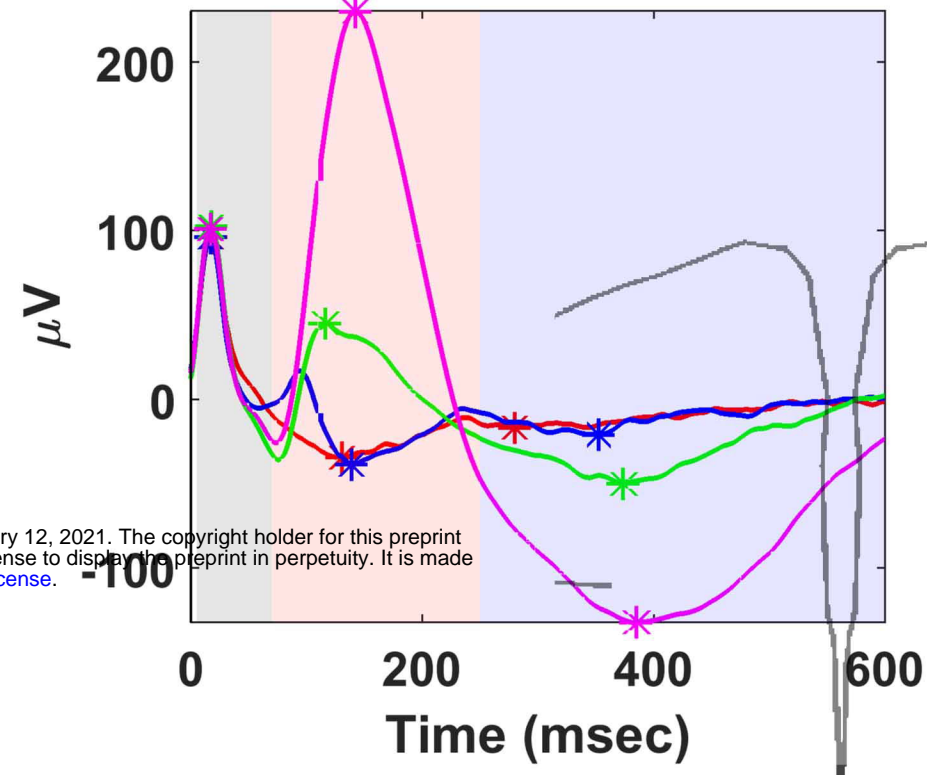

**RVL1**

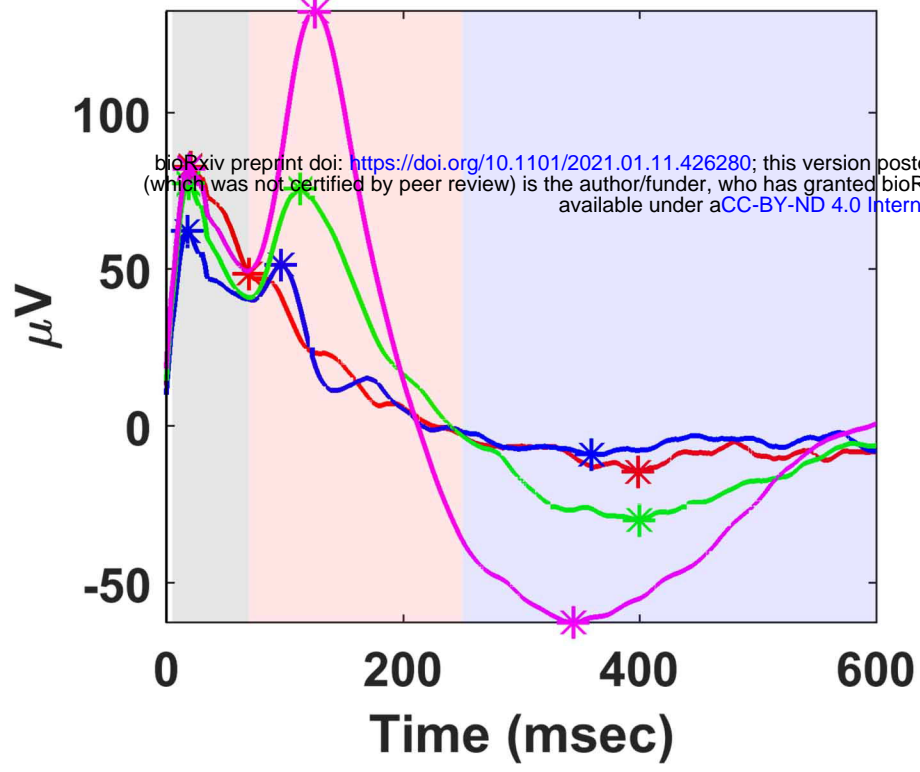

bioRxiv preprint doi: <https://doi.org/10.1101/2021.01.11.426280>; this version posted January 12, 2021. The copyright holder for this preprint (which was not certified by peer review) is the author/funder, who has granted bioRxiv a license to display the preprint in perpetuity. It is made available under aCC-BY-ND 4.0 International license.

**RSM3**

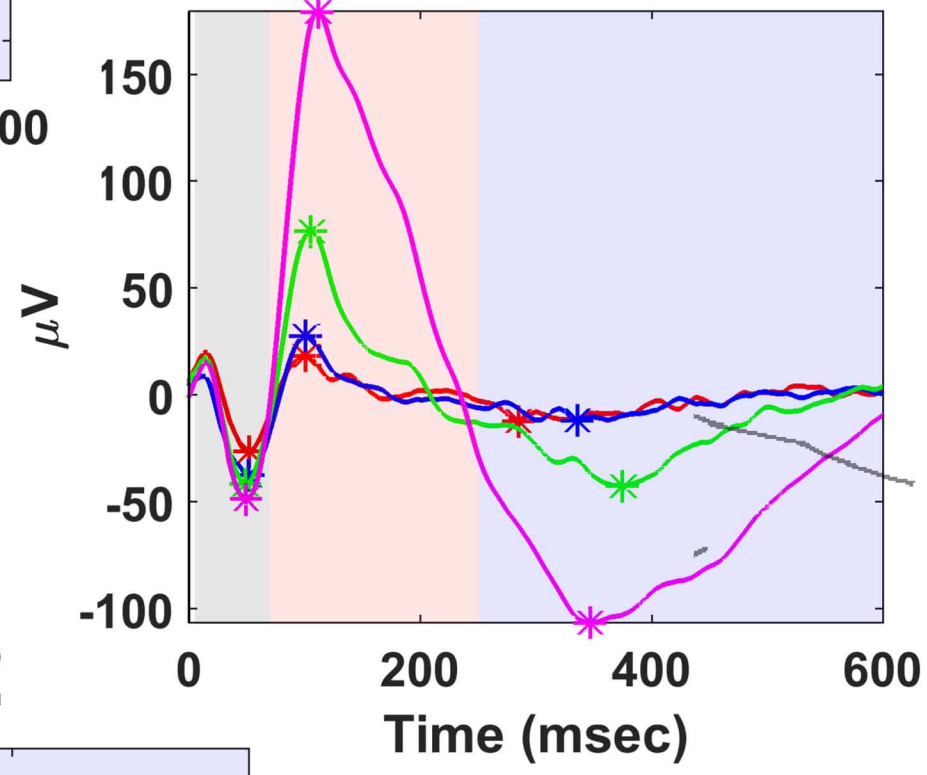

**M1**

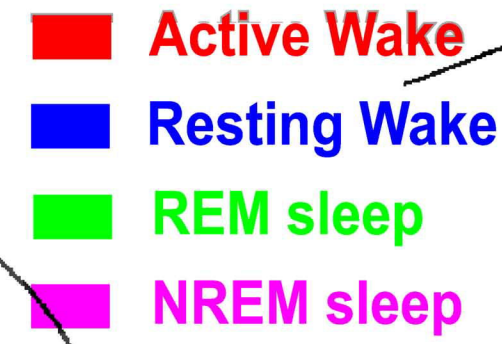

**M2**

**RPFC2**

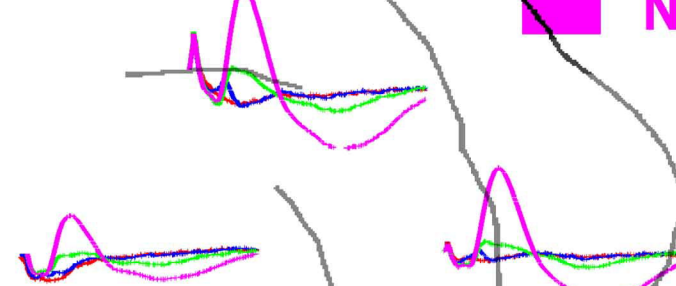

**RVL1**

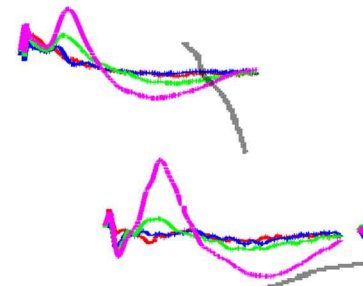

**RSM3**

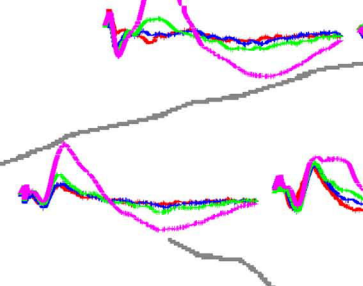

**RPC2**

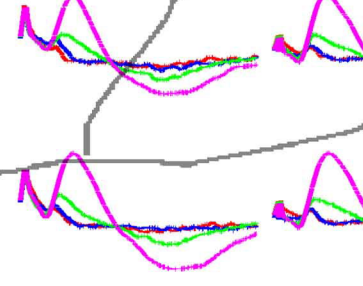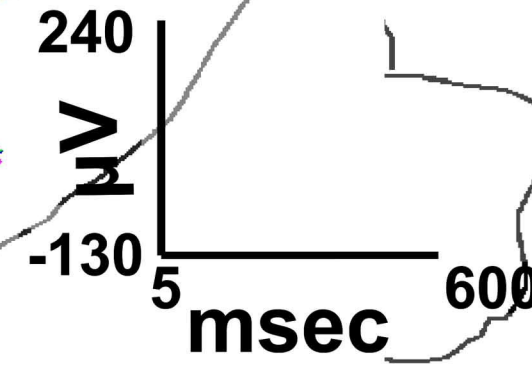

**RPFC2**

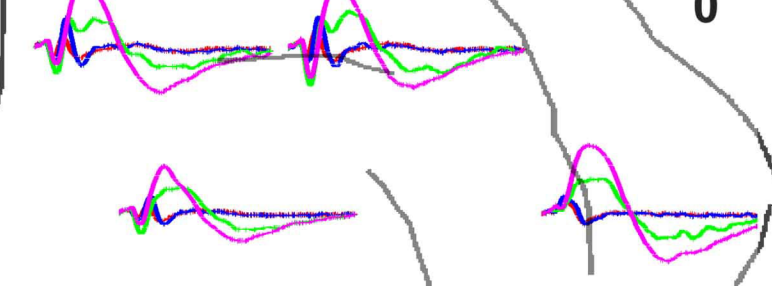

**RSM1**

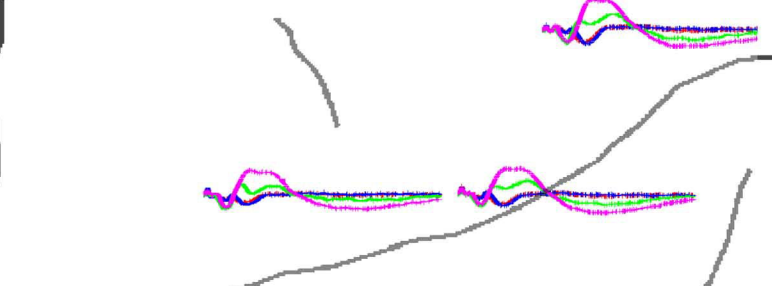

**RPC3**

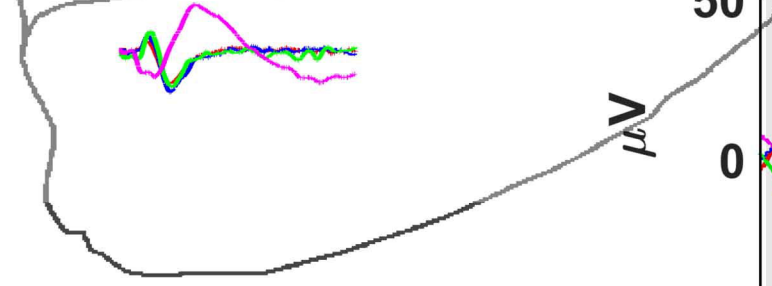

**RSM1**

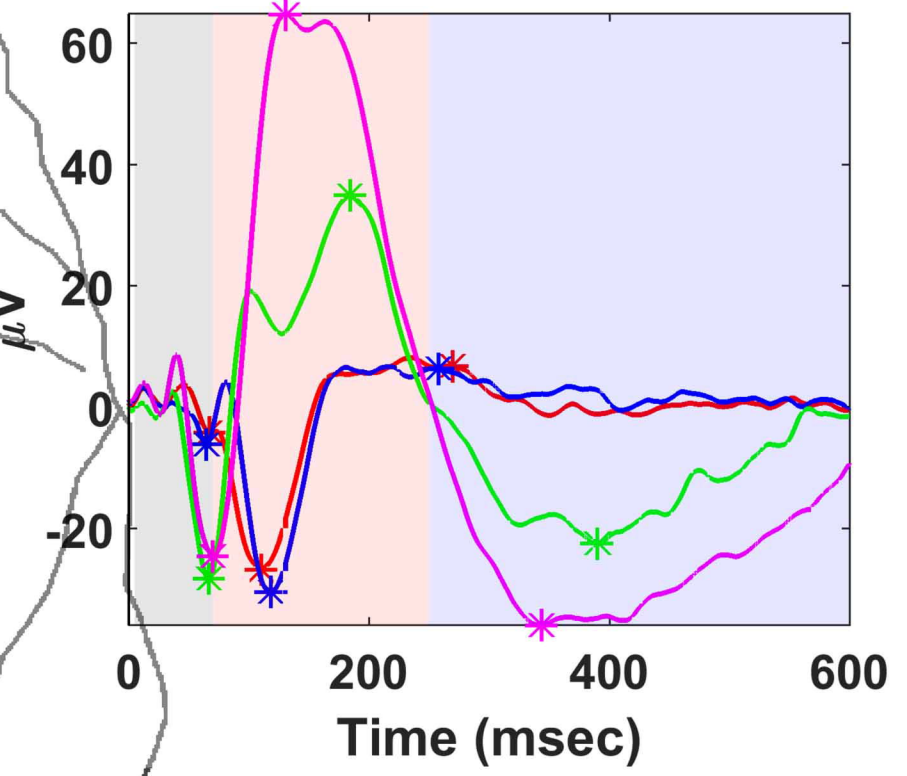

**RPC3**

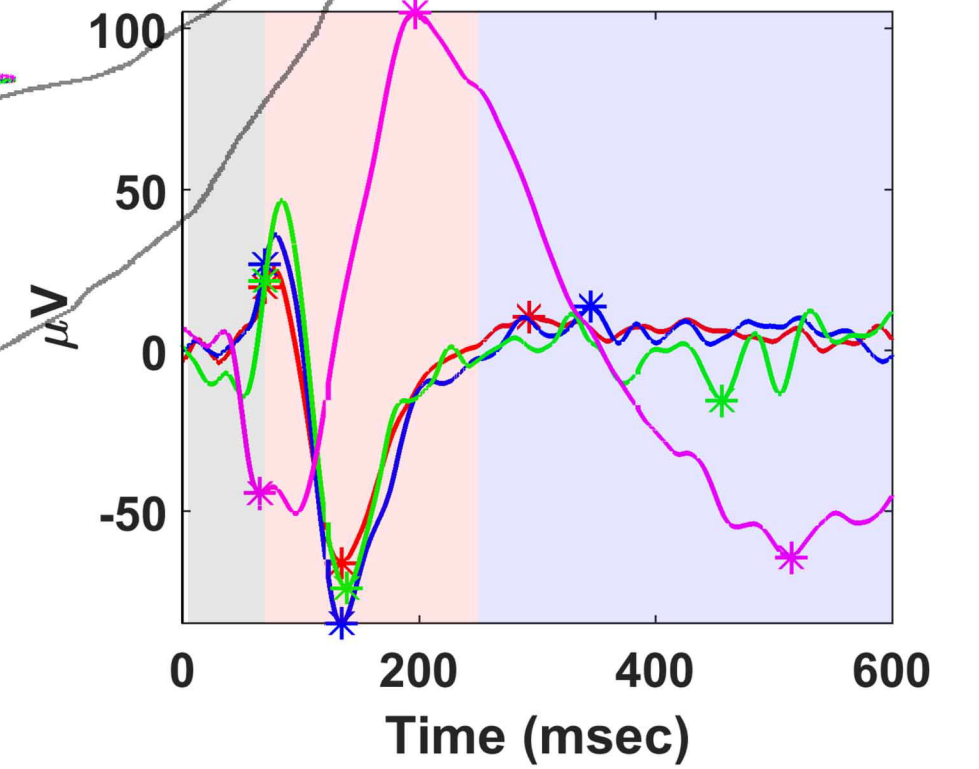



# RPFC2

# RSM2

# RPC2

AW

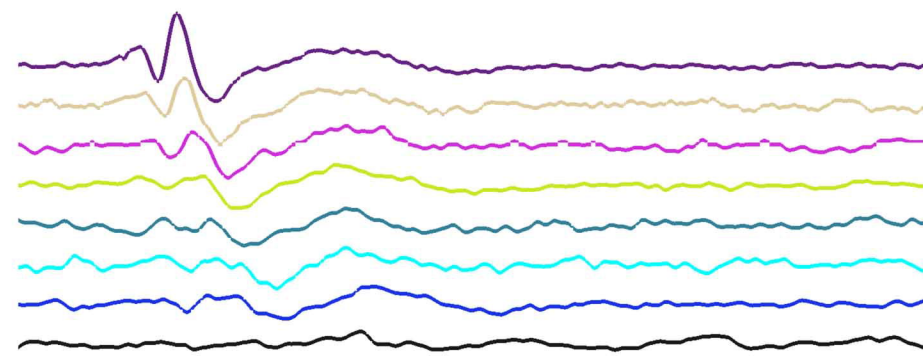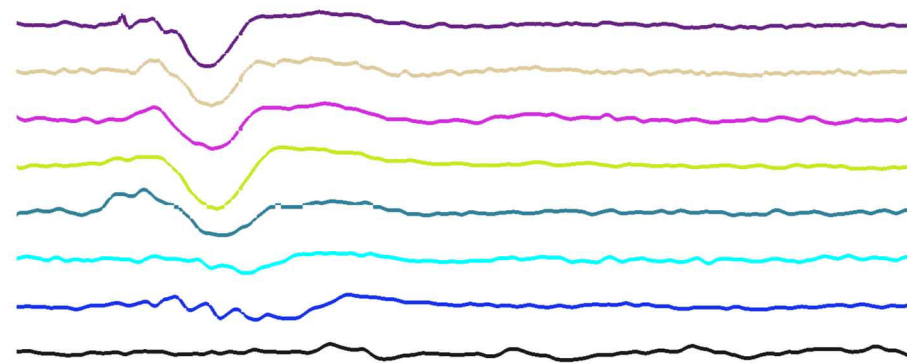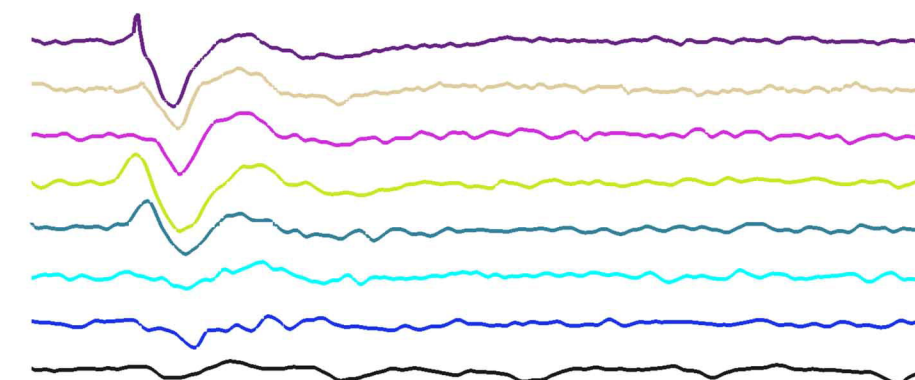

bioRxiv preprint doi: <https://doi.org/10.1101/2021.01.11.426280>; this version posted January 12, 2021. The copyright holder for this preprint (which was not certified by peer review) is the author/funder, who has granted bioRxiv a license to display the preprint in perpetuity. It is made available under aCC-BY-ND 4.0 International license.

RW

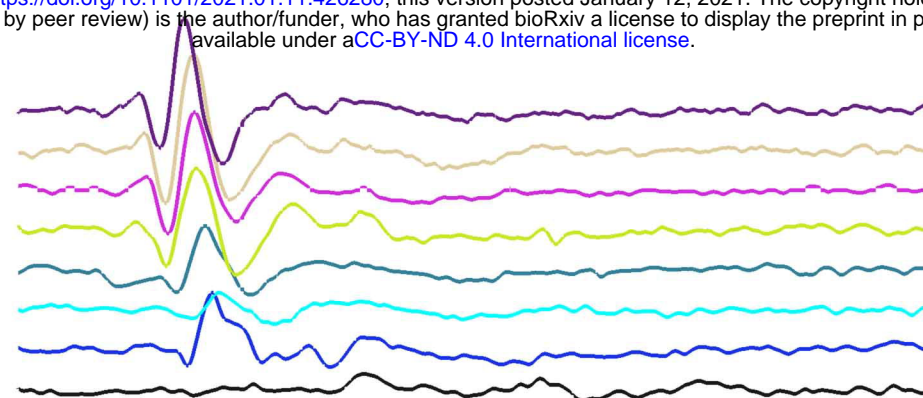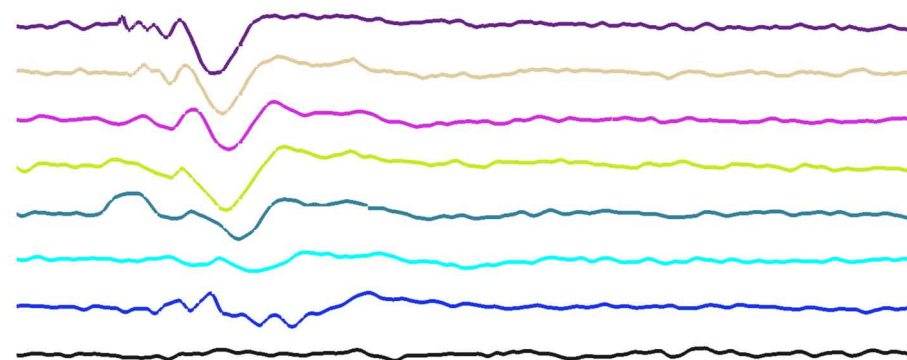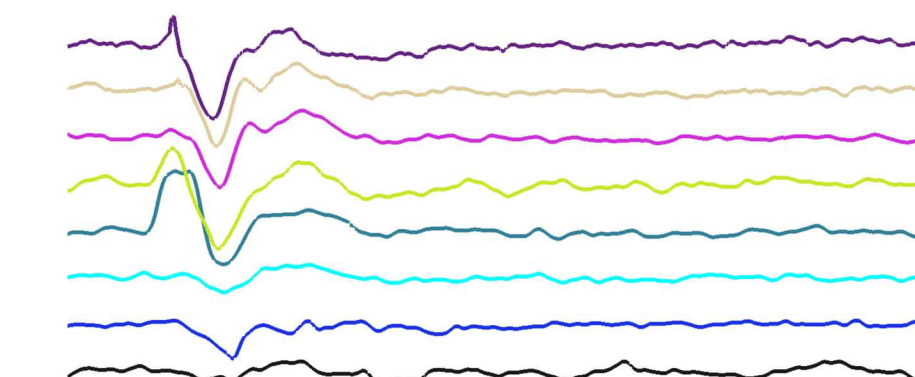

REM

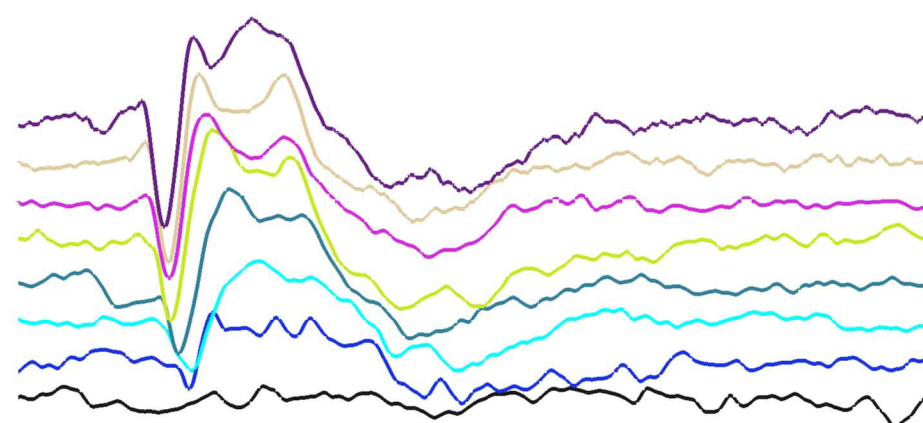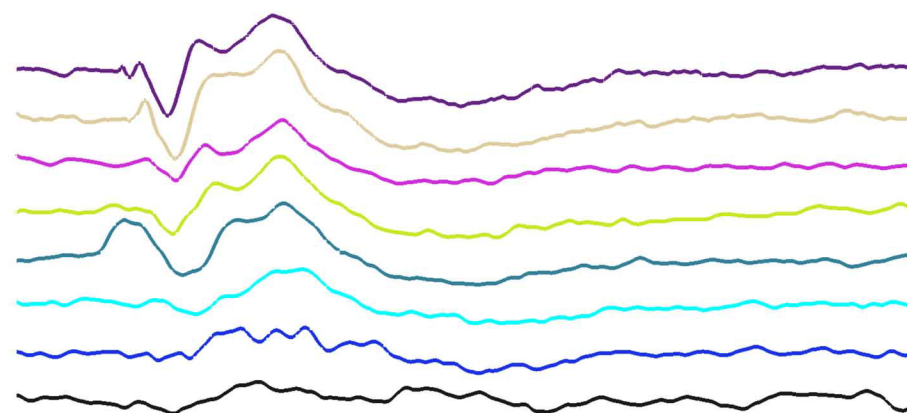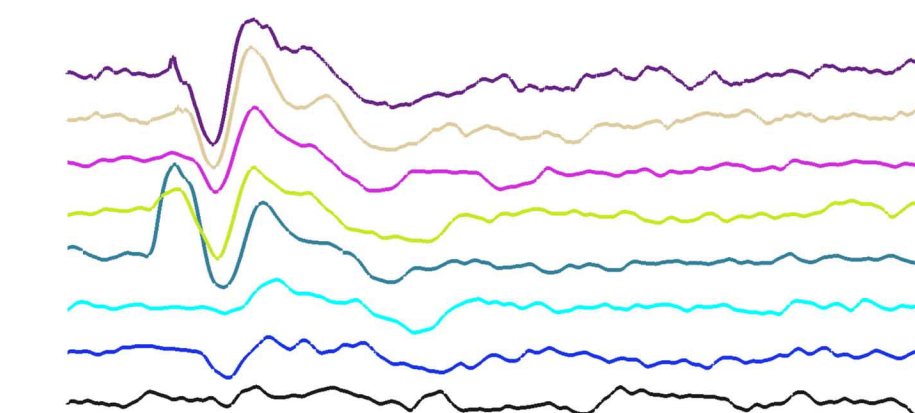

NREM

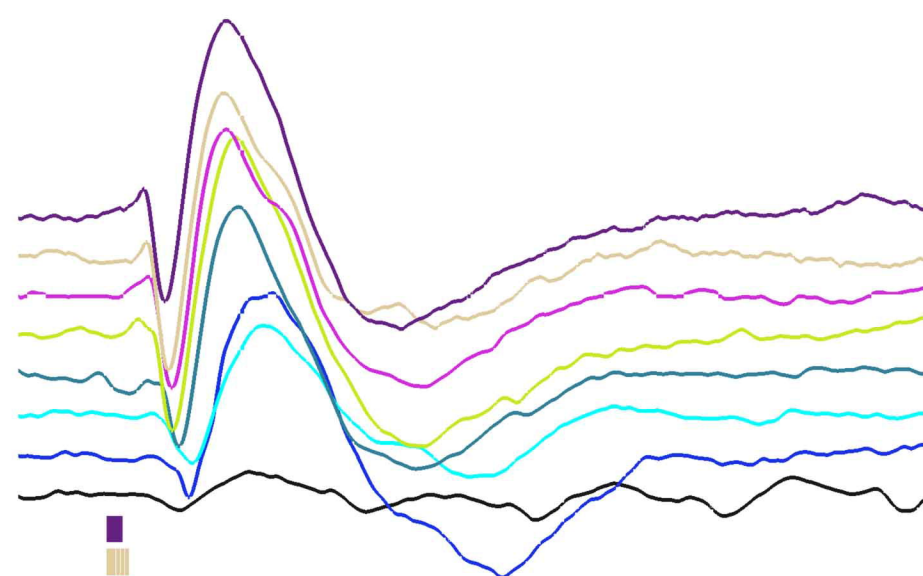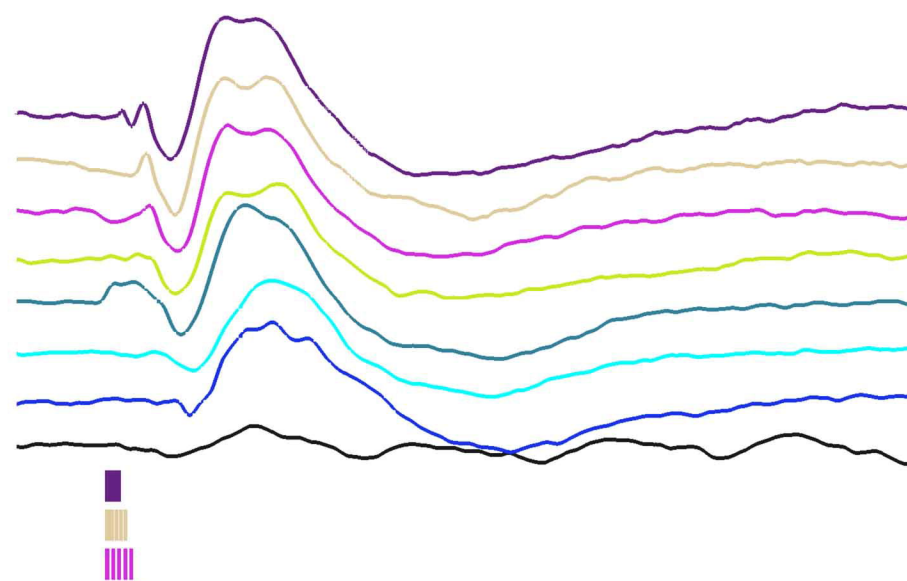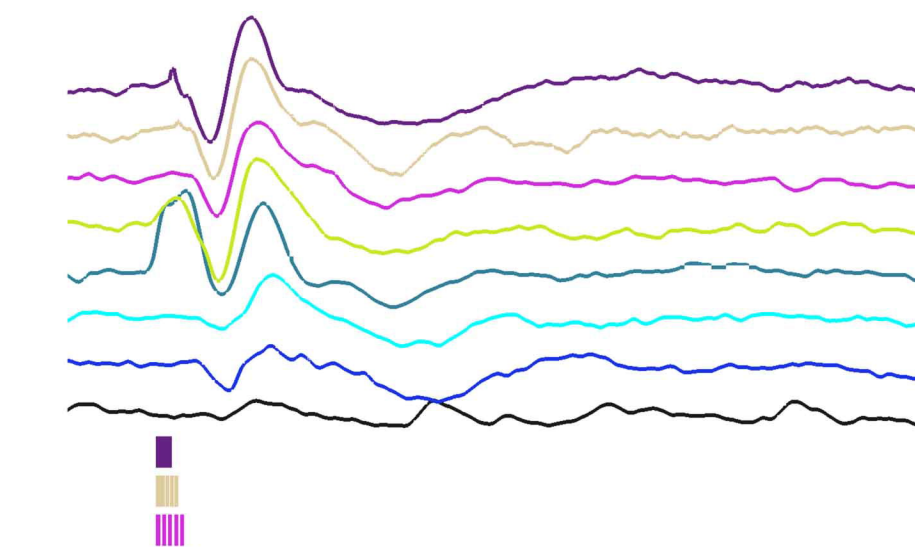

300 Hz  
200 Hz  
150 Hz  
100 Hz  
80 Hz  
50 Hz  
30 Hz  
5 Hz

0 200 400 600 800

Time (msec)

0 200 400 600 800

Time (msec)

0 200 400 600 800

Time (msec)

# M1

# M2

Early

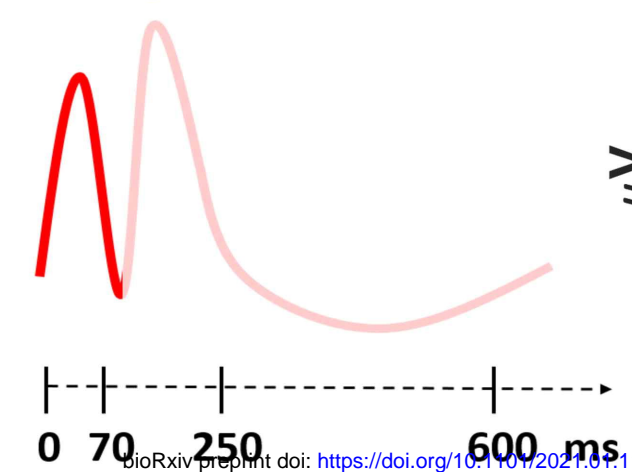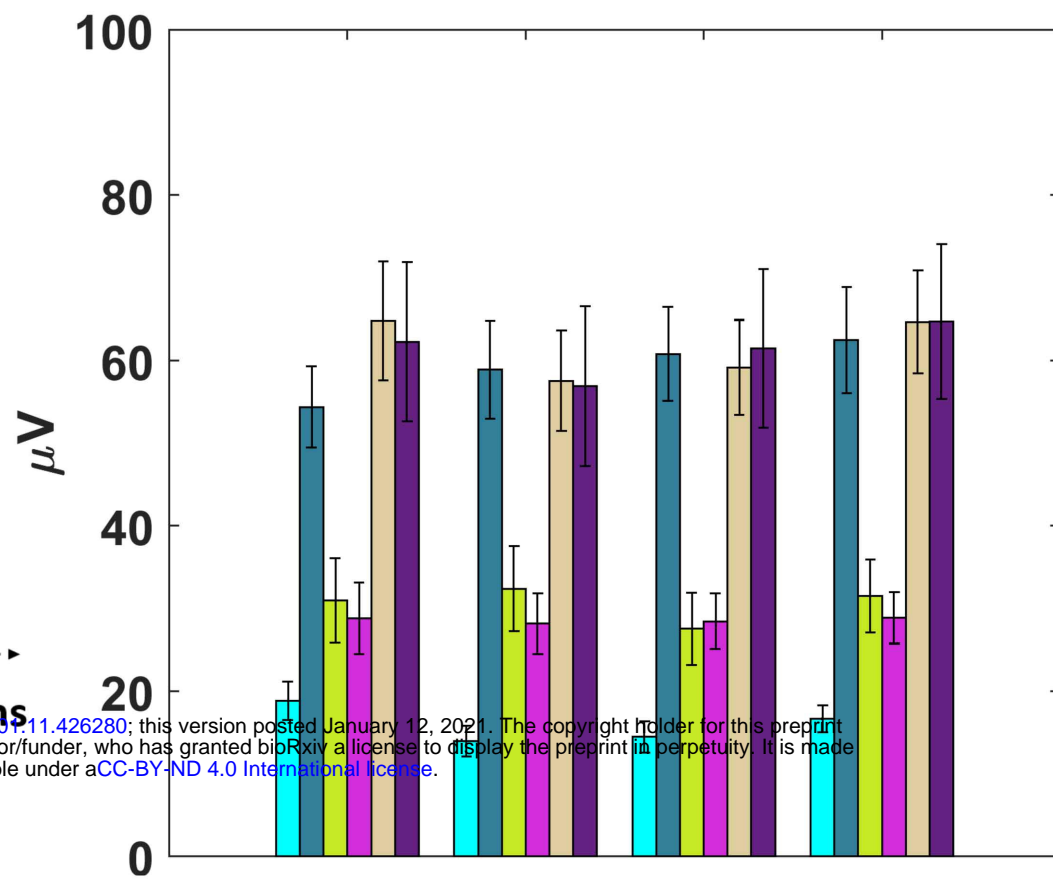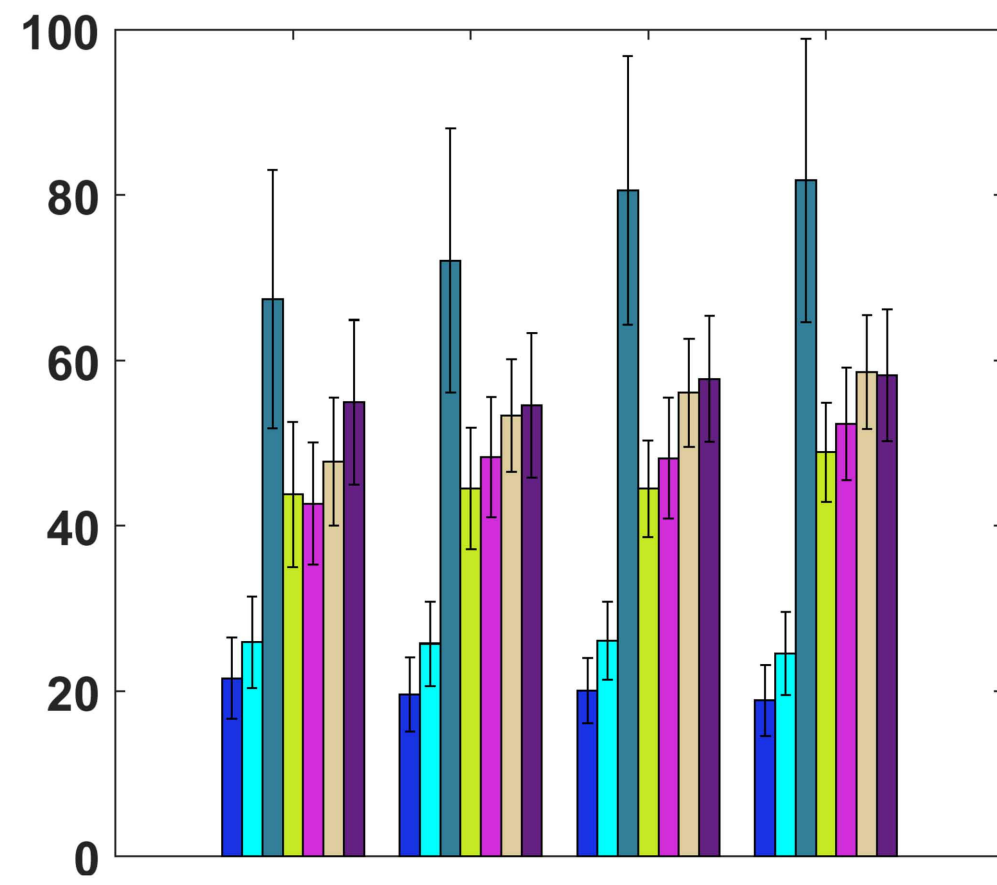

Intermediate

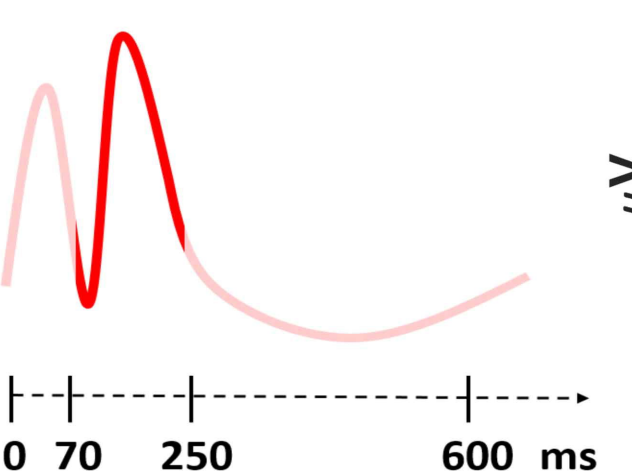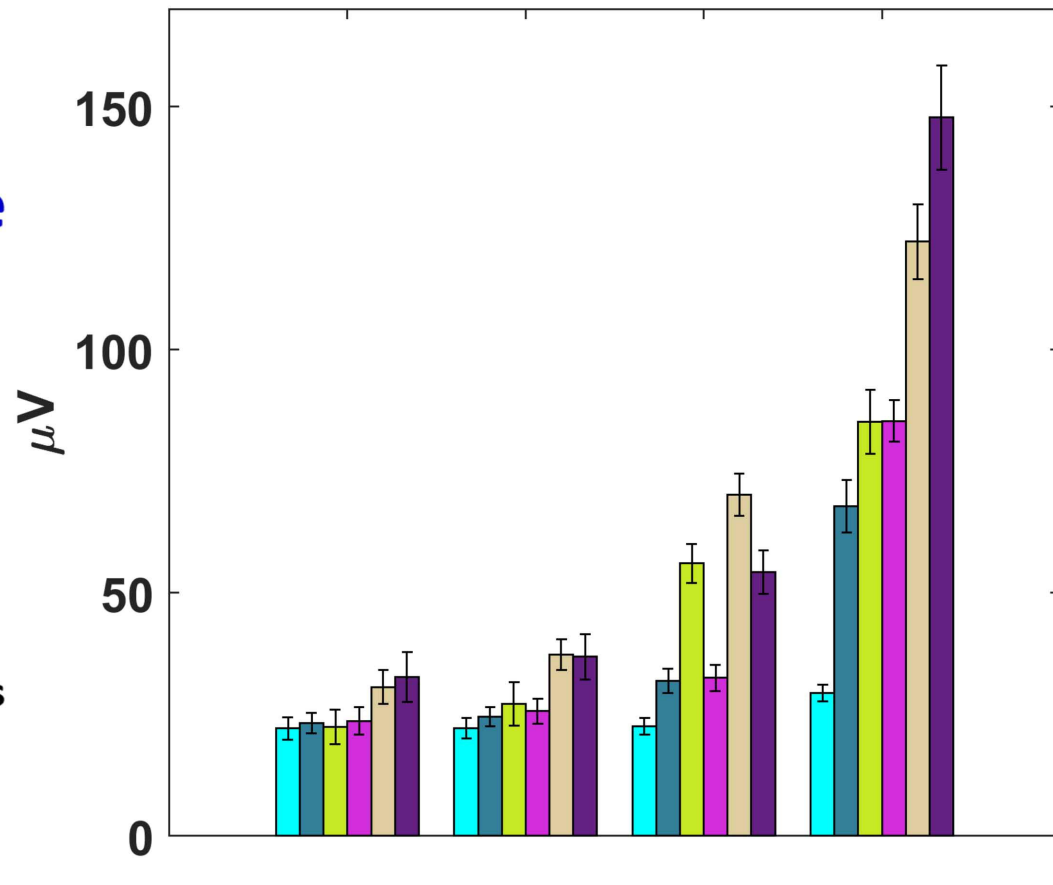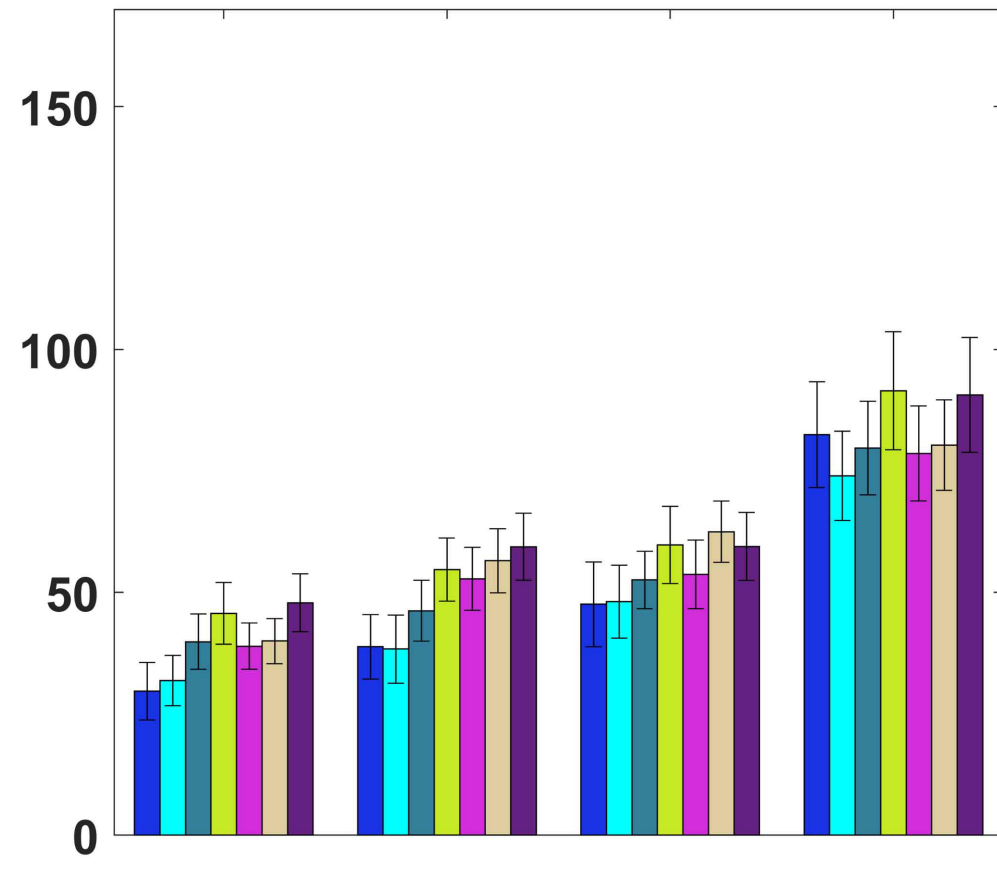

Late

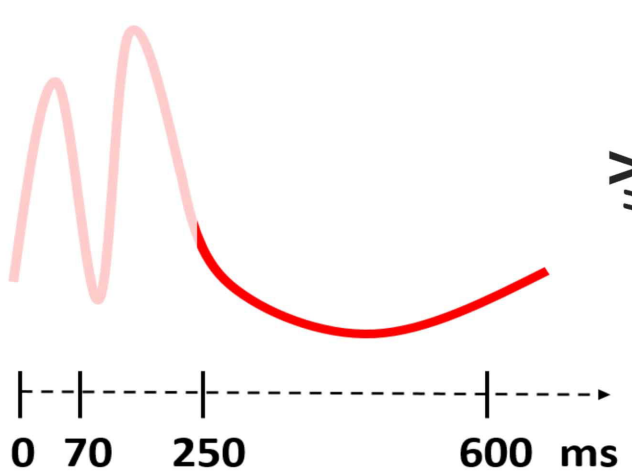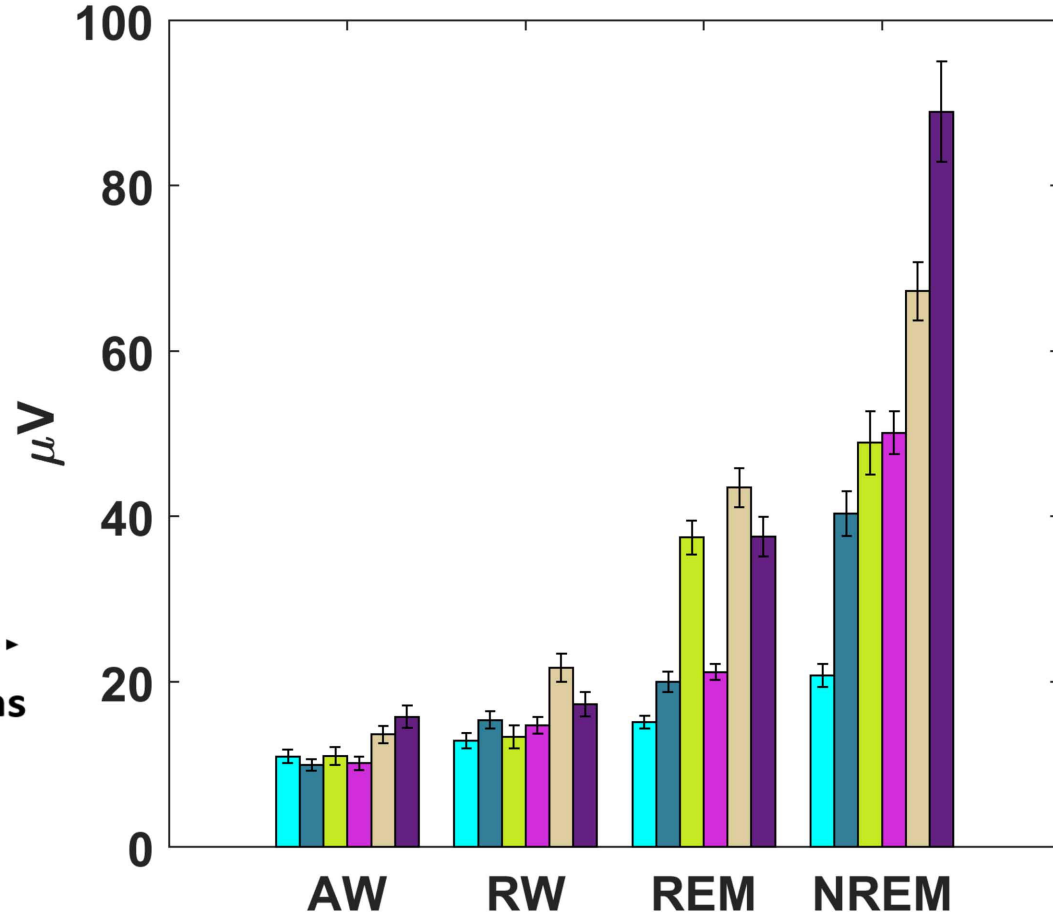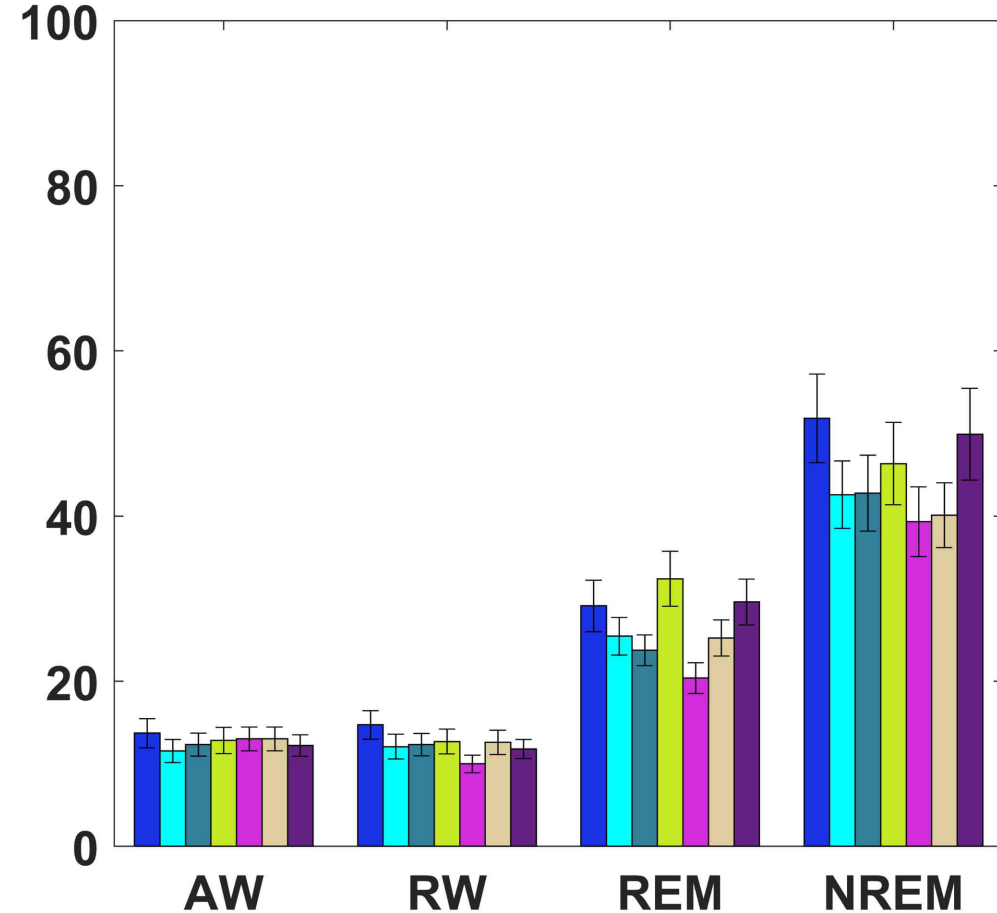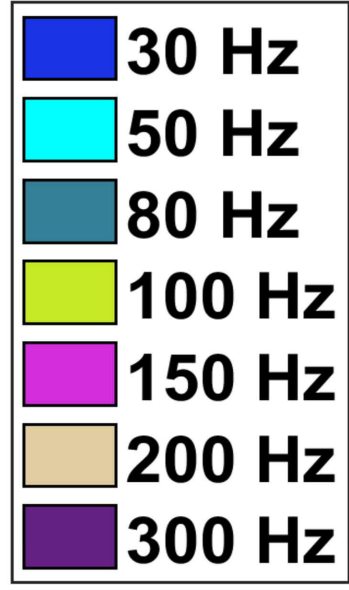







**A****M1****M2**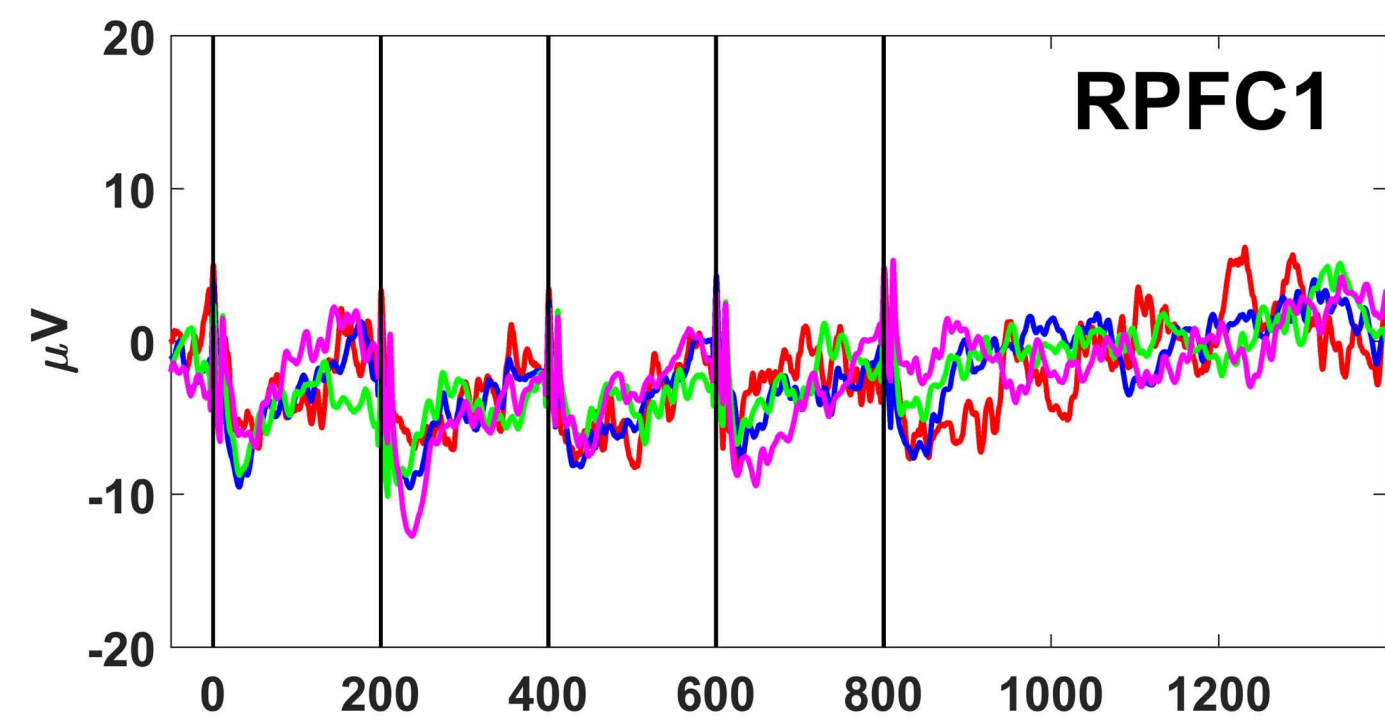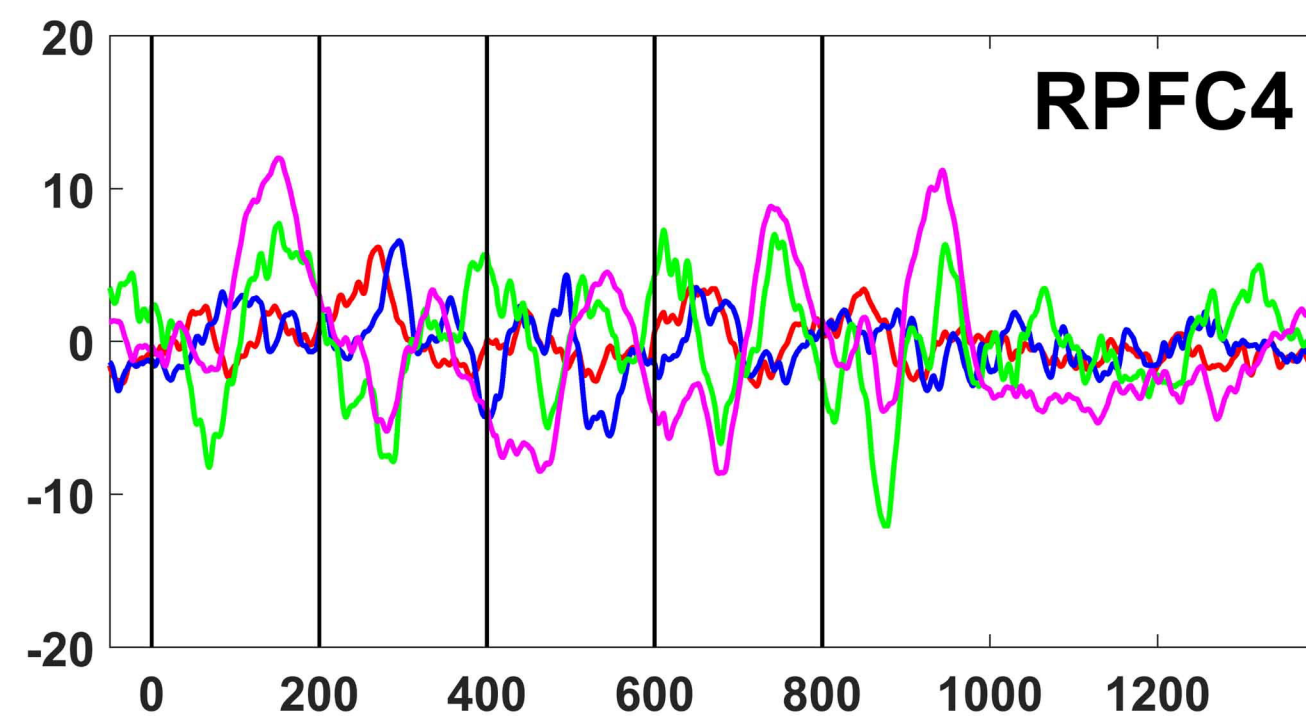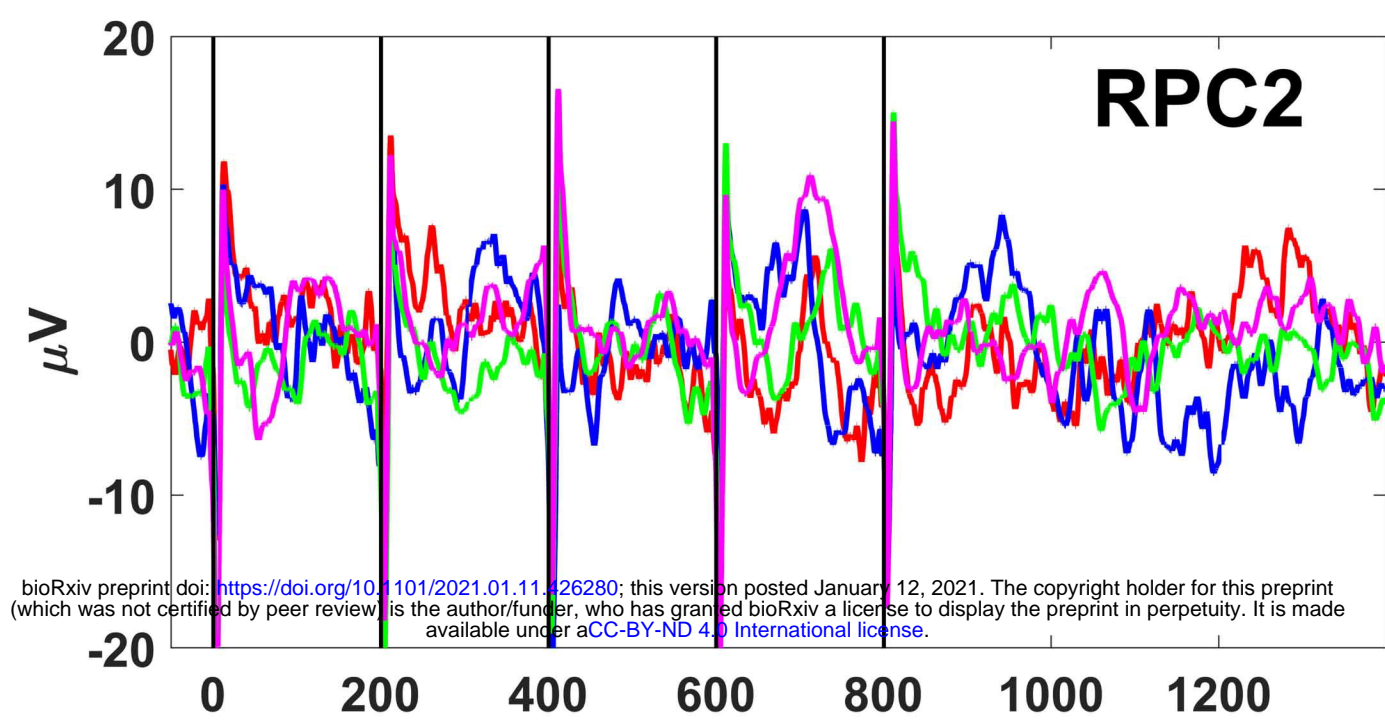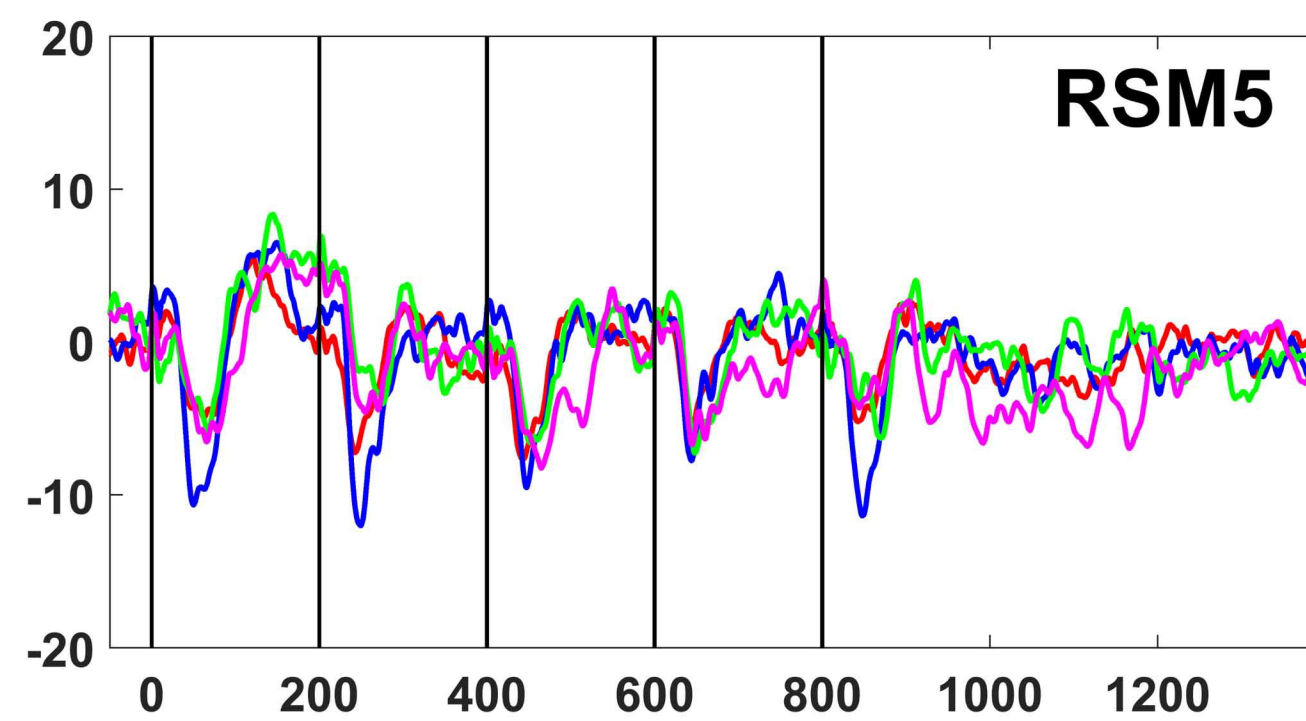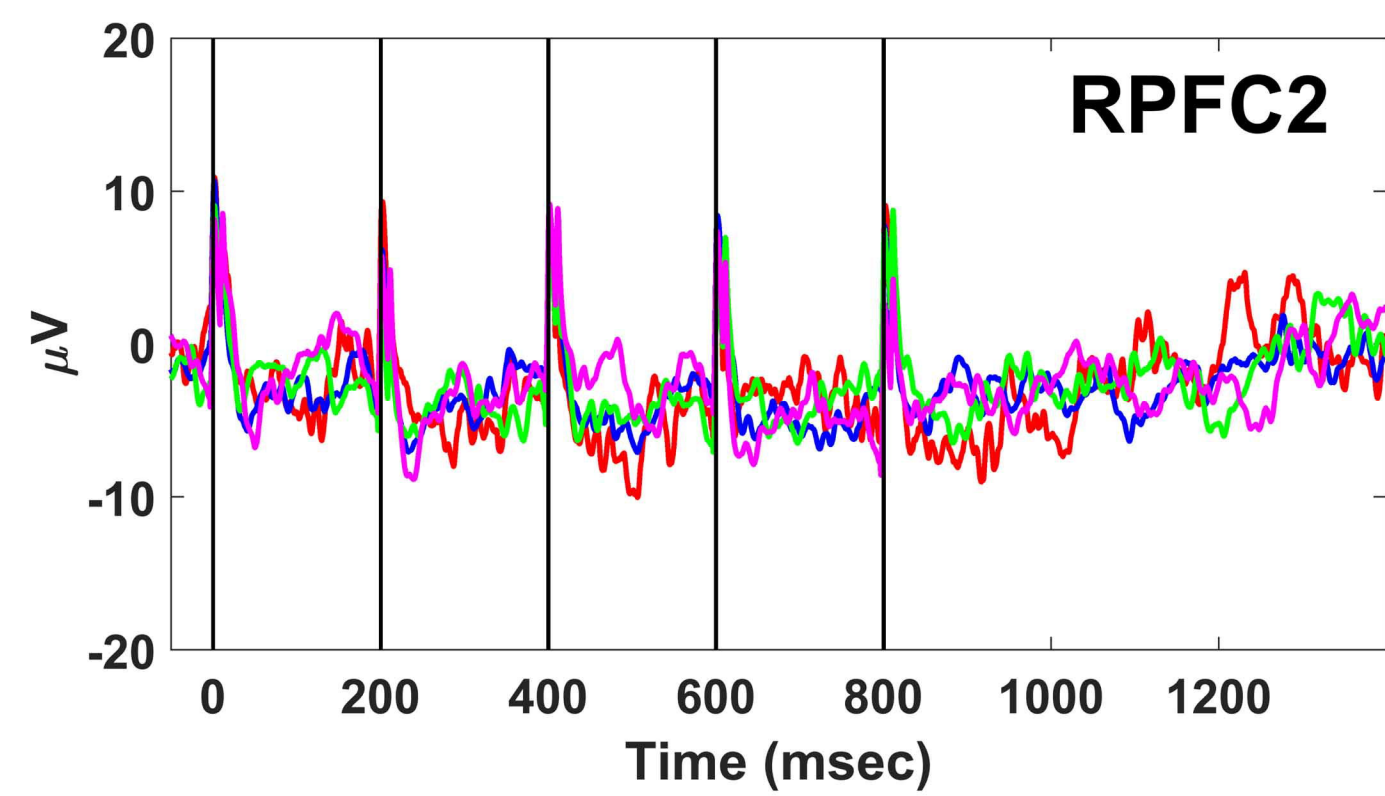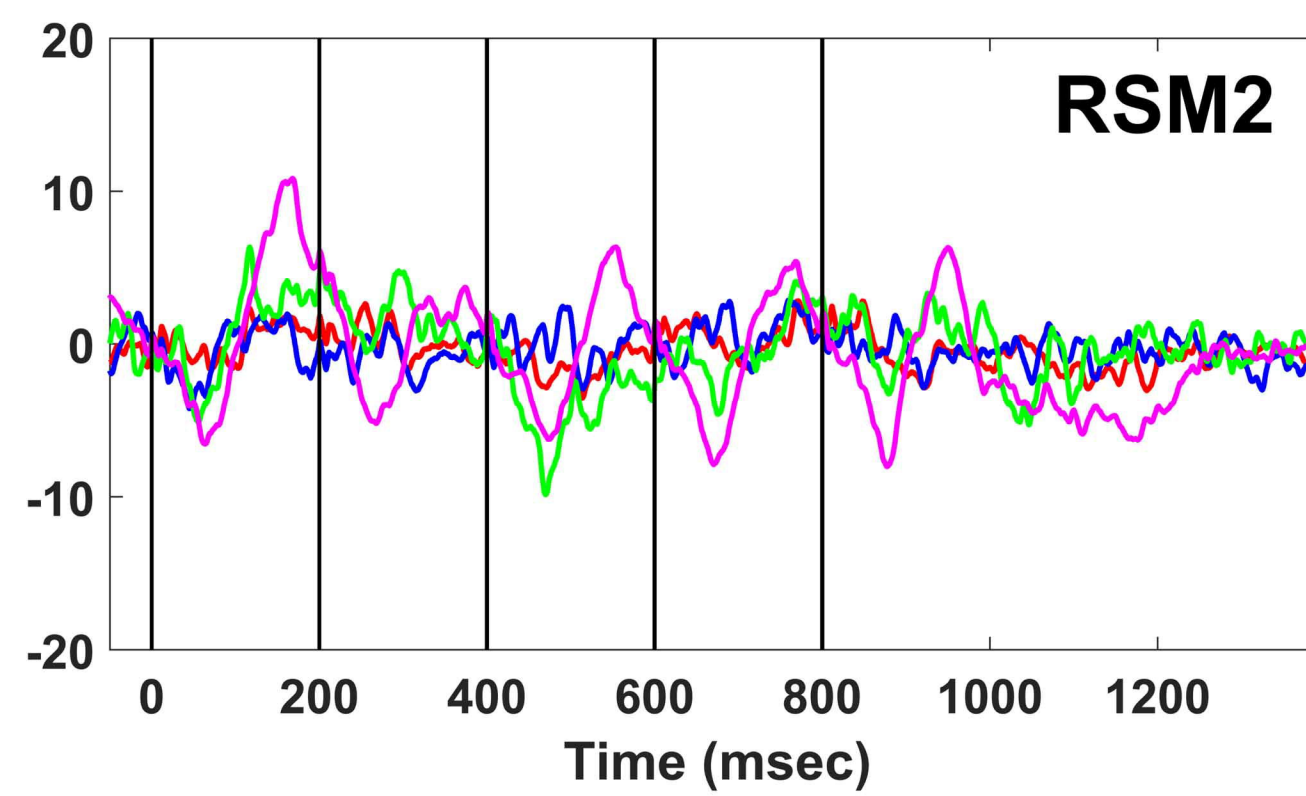

■ Active Wake  
■ Resting Wake  
■ REM sleep  
■ NREM sleep

bioRxiv preprint doi: <https://doi.org/10.1101/2021.01.11.426280>; this version posted January 12, 2021. The copyright holder for this preprint (which was not certified by peer review) is the author/funder, who has granted bioRxiv a license to display the preprint in perpetuity. It is made available under aCC-BY-ND 4.0 International license.

**B**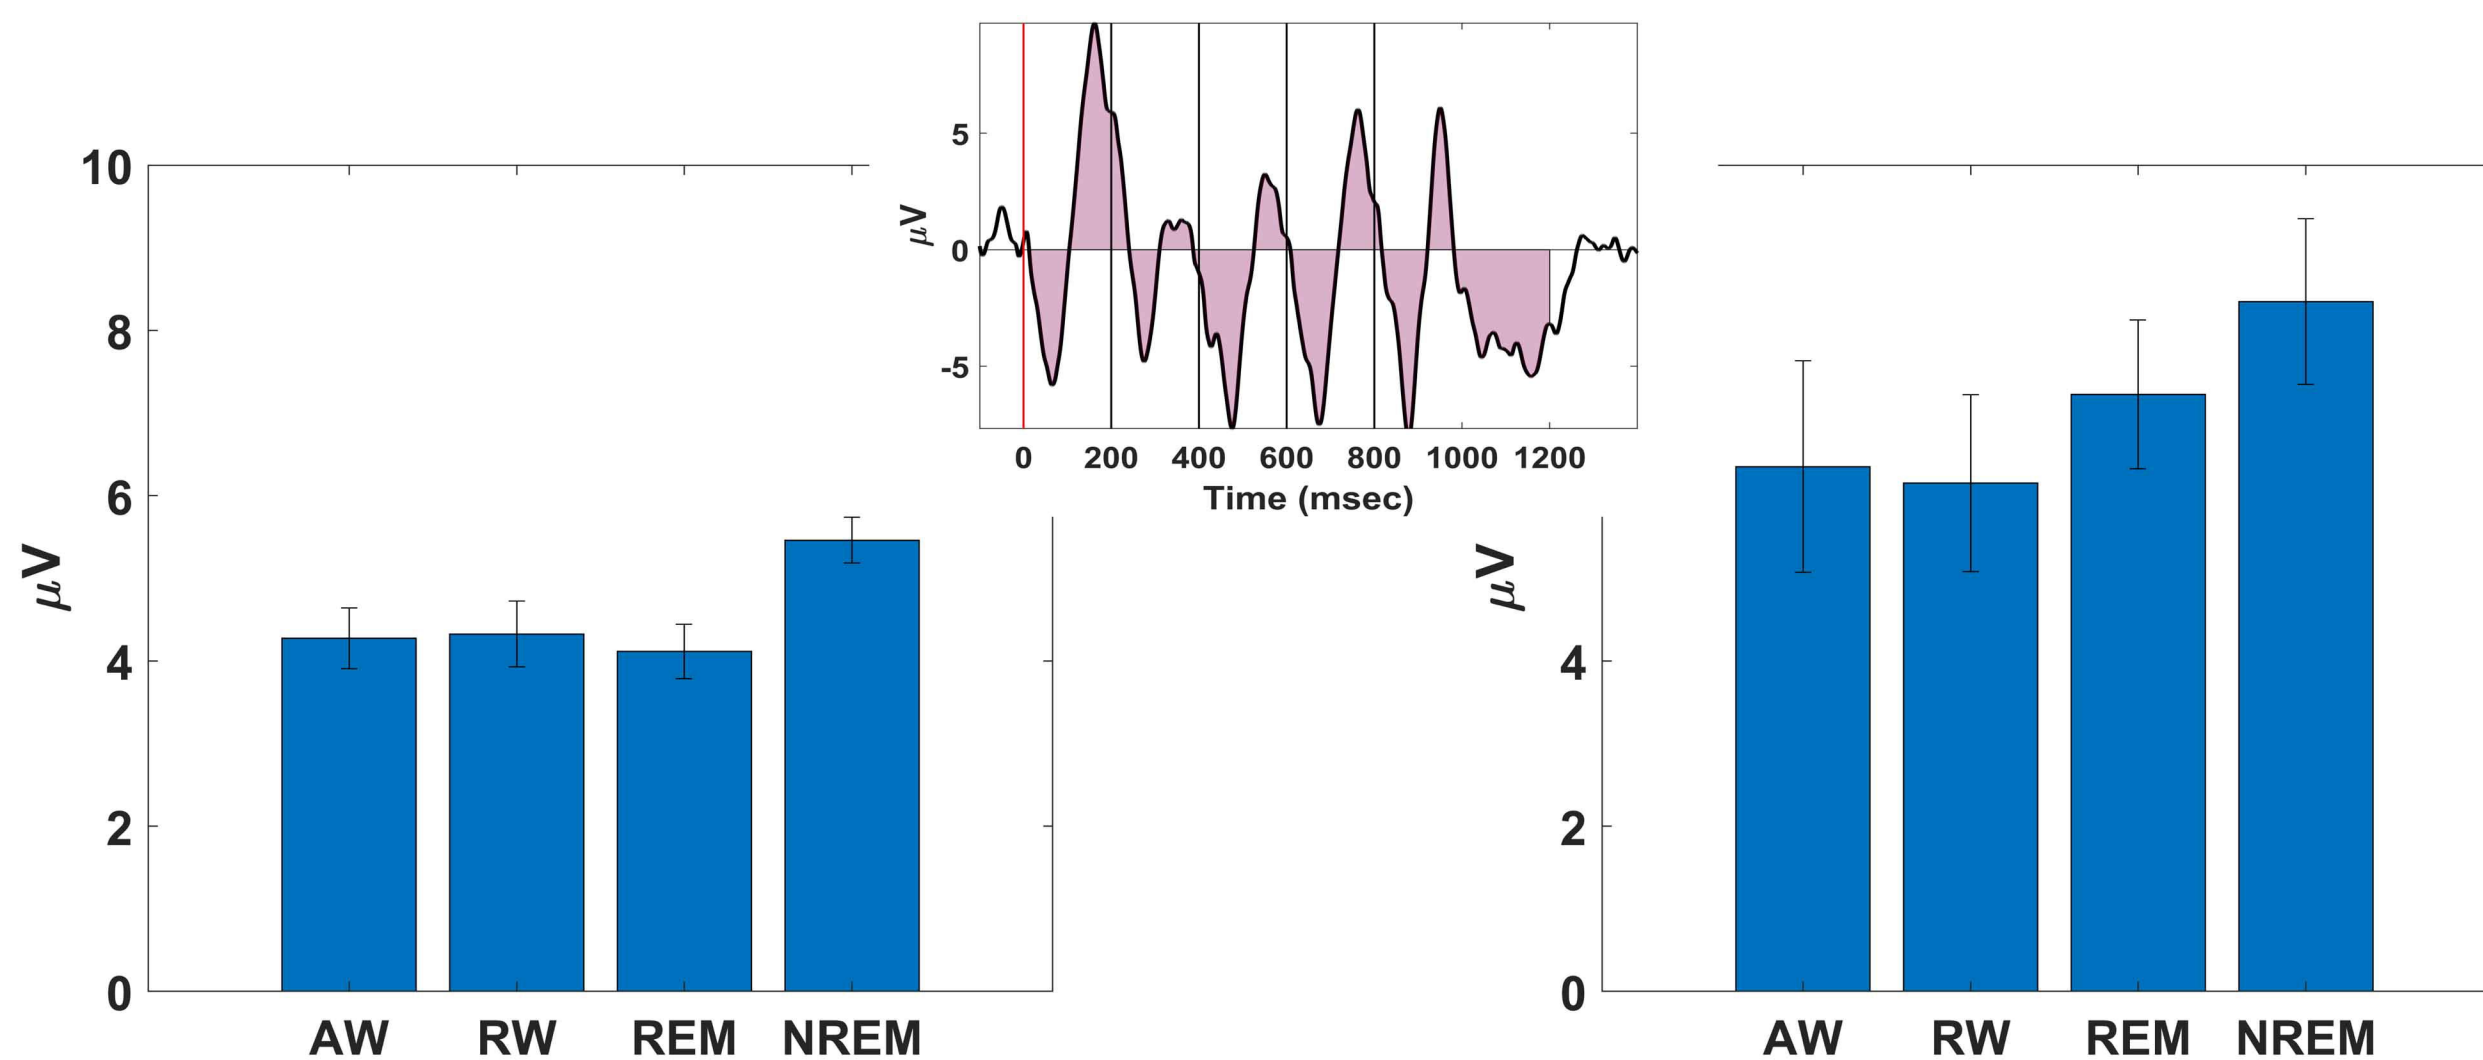

Source: https://www.biorxiv.org/content/10.1101/2021.01.11.426280v1.full.pdf
